# Supplementary material for: Organometallic chemistry of new carbon materials. Structure and dynamic behavior of group 6 metal tricabonyl complexes of graphene and perforated graphene: a DFT study
Source: Royal Society of Chemistry journal article supplement (doi:10.1039/c9nj02187f), 2019-01-01
Supplement: c9nj02187f1.pdf [file c9nj02187f1.pdf]

## SUPPLEMENTARY INFORMATION

### Organometallic Chemistry of New Carbon Material IV.

#### Structure and Dynamic Behavior of Group 6 metal Tricarbonyl Complexes of Graphene and Perforated Graphene: A DFT Study

*N. S. Zhulyaev, I. P. Gloriov, M. S. Nechaev, F. Gam, Yu. F. Oprunenko, J.-Y. Saillard*

**Cartesian coordinates of the computed stationary points**

### la-Cr

|    |             |             |             |
|----|-------------|-------------|-------------|
| 6  | 3.11879616  | 0.03028242  | 1.30743168  |
| 6  | 2.09273313  | 1.00516310  | 1.06205382  |
| 6  | 0.78552936  | 0.54708517  | 0.69017516  |
| 6  | 0.50229095  | -0.86635330 | 0.62474233  |
| 6  | 1.52588295  | -1.82304507 | 0.93115426  |
| 6  | 2.84348448  | -1.34374496 | 1.24352793  |
| 1  | 4.12567128  | 0.37291569  | 1.54291698  |
| 1  | 3.63678051  | -2.06672613 | 1.42962198  |
| 6  | 1.19962257  | -3.21656319 | 0.87396594  |
| 6  | 2.32883721  | 2.41607391  | 1.13470626  |
| 6  | 1.32962402  | 3.31322664  | 0.87463801  |
| 6  | 0.01658318  | 2.88631042  | 0.50524637  |
| 6  | -0.25415632 | 1.49718667  | 0.41239062  |
| 1  | 3.32650119  | 2.76062789  | 1.41085418  |
| 1  | 1.52813090  | 4.38454571  | 0.94150567  |
| 6  | -1.02950634 | 3.80711682  | 0.22571402  |
| 6  | -0.81787406 | -1.31454739 | 0.28247961  |
| 6  | -1.55713314 | 1.03942307  | 0.06821961  |
| 24 | 2.35174203  | -0.43858217 | -0.70920911 |
| 6  | 3.63081703  | 0.62613124  | -1.46357962 |
| 6  | 3.14300691  | -1.83849946 | -1.57680393 |
| 6  | 1.32867226  | -0.16762184 | -2.21892424 |
| 8  | 4.45276111  | 1.29948414  | -1.94540484 |
| 8  | 3.65553015  | -2.72833081 | -2.13061077 |
| 8  | 0.69260382  | 0.00154981  | -3.17892525 |
| 1  | 1.98280516  | -3.94151316 | 1.10067678  |
| 6  | -0.06306403 | -3.63337475 | 0.55319069  |
| 6  | -1.10409391 | -2.70323679 | 0.24677276  |
| 6  | -1.83812083 | -0.36215132 | 0.00344806  |

|   |             |             |             |
|---|-------------|-------------|-------------|
| 6 | -2.28643187 | 3.37021558  | -0.12147090 |
| 1 | -0.81689846 | 4.87596998  | 0.28885912  |
| 1 | -3.07815799 | 4.09035047  | -0.33669259 |
| 6 | -2.58690697 | 1.98317506  | -0.20537501 |
| 6 | -2.41870793 | -3.12201689 | -0.09490059 |
| 6 | -3.14663774 | -0.80883604 | -0.33452626 |
| 6 | -3.88407489 | 1.50464415  | -0.55048614 |
| 1 | -2.63474910 | -4.19143963 | -0.13087734 |
| 6 | -3.40440051 | -2.20623643 | -0.37953473 |
| 6 | -4.15354454 | 0.16044395  | -0.61267992 |
| 1 | -4.66868515 | 2.23294149  | -0.76462995 |
| 1 | -0.29306444 | -4.69998328 | 0.52090997  |
| 1 | -4.40822567 | -2.54417406 | -0.64388350 |
| 1 | -5.15397244 | -0.18788672 | -0.87668712 |

**Ib-Cr**

|   |             |             |             |
|---|-------------|-------------|-------------|
| 6 | -2.29599280 | 2.96447137  | -0.55015561 |
| 6 | -2.40927281 | 1.54918915  | -0.52745099 |
| 6 | -1.20232290 | 0.77416709  | -0.48865118 |
| 6 | 0.07700244  | 1.43326209  | -0.47250308 |
| 6 | 0.14712887  | 2.86628372  | -0.49544095 |
| 6 | -1.07044153 | 3.59587718  | -0.53482359 |
| 6 | 1.28225436  | 0.65814110  | -0.45420505 |
| 6 | 2.55735219  | 1.31616614  | -0.45862316 |
| 6 | 2.58540322  | 2.72977280  | -0.47801446 |
| 6 | 1.42195859  | 3.47801871  | -0.49579789 |
| 6 | 1.21326335  | -0.77941143 | -0.45168044 |
| 6 | 2.41958356  | -1.55645558 | -0.45369126 |
| 6 | 3.66067189  | -0.86652160 | -0.45916065 |
| 6 | 3.72673478  | 0.51061887  | -0.46152155 |
| 6 | -0.06059655 | -1.43576826 | -0.46765246 |
| 6 | -0.12790079 | -2.86895963 | -0.48546408 |

|    |             |             |             |
|----|-------------|-------------|-------------|
| 6  | 1.08255263  | -3.59988084 | -0.48351303 |
| 6  | 2.31224260  | -2.96630669 | -0.46818852 |
| 6  | -1.27093136 | -0.65728097 | -0.48608589 |
| 6  | -2.54654376 | -1.31340532 | -0.52241605 |
| 6  | -2.56920805 | -2.73309484 | -0.54013137 |
| 6  | -1.40971507 | -3.47884529 | -0.52241262 |
| 6  | -3.64710386 | 0.86639140  | -0.55921425 |
| 6  | -3.71335339 | -0.51541629 | -0.55677949 |
| 1  | -3.21194947 | 3.55752577  | -0.57823459 |
| 1  | -1.02122762 | 4.68619961  | -0.55083702 |
| 1  | 3.55469444  | 3.23167240  | -0.48089279 |
| 1  | 1.47679196  | 4.56804157  | -0.51266656 |
| 1  | 4.58053914  | -1.45416625 | -0.45918288 |
| 1  | 4.69861810  | 1.00752750  | -0.46341100 |
| 1  | 1.03284489  | -4.69020006 | -0.49654576 |
| 1  | 3.22907127  | -3.55864586 | -0.46918114 |
| 1  | -3.53772077 | -3.23587093 | -0.56624059 |
| 1  | -1.46506999 | -4.56892206 | -0.53456928 |
| 1  | -4.56606176 | 1.45470322  | -0.58824083 |
| 1  | -4.68438979 | -1.01320576 | -0.58388999 |
| 24 | -0.01845750 | 0.00315352  | 1.34499874  |
| 6  | -0.82016084 | -1.21203310 | 2.43963544  |
| 6  | -0.69517629 | 1.29654275  | 2.43441369  |
| 6  | 1.41471094  | -0.06664164 | 2.46693997  |
| 8  | 2.33049154  | -0.11137349 | 3.18981128  |
| 8  | -1.33248856 | -1.98843522 | 3.14527015  |
| 8  | -1.12782533 | 2.12311513  | 3.13640082  |

#### **TS(la-b)-Cr**

|   |             |            |             |
|---|-------------|------------|-------------|
| 6 | -2.57110399 | 2.72200664 | -0.64665567 |
| 6 | -2.62589737 | 1.29978803 | -0.66442316 |
| 6 | -1.40747610 | 0.56874623 | -0.60604058 |

|   |             |             |             |
|---|-------------|-------------|-------------|
| 6 | -0.16317841 | 1.27074214  | -0.54004567 |
| 6 | -0.13727399 | 2.69996754  | -0.52824811 |
| 6 | -1.37565794 | 3.39810537  | -0.57870328 |
| 6 | 1.07419250  | 0.53835651  | -0.50444565 |
| 6 | 2.32834005  | 1.23477886  | -0.43329590 |
| 6 | 2.30568534  | 2.66455535  | -0.43782578 |
| 6 | 1.12450185  | 3.36619925  | -0.50246697 |
| 6 | 1.05053996  | -0.89773937 | -0.48165603 |
| 6 | 2.27847552  | -1.62489478 | -0.46466240 |
| 6 | 3.50564329  | -0.90608475 | -0.44420126 |
| 6 | 3.52996434  | 0.46865297  | -0.41281392 |
| 6 | -0.19961725 | -1.58706486 | -0.55238139 |
| 6 | -0.21793451 | -3.00972463 | -0.56706697 |
| 6 | 1.01960374  | -3.71040774 | -0.51805181 |
| 6 | 2.22251689  | -3.04501130 | -0.47541273 |
| 6 | -1.42355915 | -0.85706433 | -0.62490944 |
| 6 | -2.66294271 | -1.54980192 | -0.69596521 |
| 6 | -2.65184535 | -2.97309949 | -0.70022991 |
| 6 | -1.47304532 | -3.67692093 | -0.63813068 |
| 6 | -3.85130757 | 0.57959395  | -0.73569602 |
| 6 | -3.86864911 | -0.79447753 | -0.75168958 |
| 1 | -3.50942460 | 3.27885952  | -0.68428590 |
| 1 | -1.36087044 | 4.48910820  | -0.56438917 |
| 1 | 3.25710751  | 3.19700692  | -0.39245434 |
| 1 | 1.13703135  | 4.45699765  | -0.50246789 |
| 1 | 4.44020291  | -1.46882212 | -0.42932064 |
| 1 | 4.48209388  | 1.00056480  | -0.37485921 |
| 1 | 1.00004918  | -4.80199249 | -0.52126752 |
| 1 | 3.15894926  | -3.60476472 | -0.44738089 |
| 1 | -3.60487150 | -3.50294836 | -0.75117251 |
| 1 | -1.48467174 | -4.76848089 | -0.64240408 |
| 1 | -4.78638850 | 1.14136399  | -0.77481982 |

|    |             |             |             |
|----|-------------|-------------|-------------|
| 1  | -4.81835679 | -1.33019959 | -0.80265129 |
| 24 | 0.89308948  | 0.83060504  | 1.69490215  |
| 6  | -0.43059283 | 0.24882584  | 2.77256925  |
| 6  | 1.06566771  | 2.26517736  | 2.77064986  |
| 6  | 2.04961055  | -0.04775018 | 2.75735876  |
| 8  | 2.79996186  | -0.62633920 | 3.44720554  |
| 8  | -1.28101811 | -0.13550391 | 3.48084643  |
| 8  | 1.18245614  | 3.19909092  | 3.46895938  |

**TS(la-a)-Cr**

|    |            |             |             |
|----|------------|-------------|-------------|
| 6  | 2.78404780 | -1.26753839 | 1.24407774  |
| 6  | 2.10035255 | -0.00994313 | 1.13979304  |
| 6  | 0.71741377 | -0.00507060 | 0.74079012  |
| 6  | 0.02520349 | -1.24148621 | 0.55325030  |
| 6  | 0.71908507 | -2.47987364 | 0.69574774  |
| 6  | 2.10547729 | -2.45126187 | 1.00896181  |
| 1  | 3.82933674 | -1.28052142 | 1.55132706  |
| 1  | 2.64110096 | -3.39935641 | 1.08769979  |
| 6  | 0.00741701 | -3.69204645 | 0.49829697  |
| 6  | 2.78943943 | 1.24365276  | 1.25605520  |
| 6  | 2.11596285 | 2.43246827  | 1.03225824  |
| 6  | 0.72971281 | 2.47001967  | 0.71935967  |
| 6  | 0.03052310 | 1.23603875  | 0.56506830  |
| 1  | 3.83476890 | 1.24921531  | 1.56339062  |
| 1  | 2.65565102 | 3.37745980  | 1.12002717  |
| 6  | 0.02326016 | 3.68706583  | 0.53349716  |
| 24 | 2.77878146 | -0.00165111 | -0.90579485 |
| 6  | 4.56367462 | -0.00444670 | -1.12805113 |
| 6  | 2.67888063 | -1.26821606 | -2.20058411 |
| 6  | 2.68436737 | 1.27762124  | -2.18844691 |
| 8  | 5.72717651 | -0.00626815 | -1.27469596 |
| 8  | 2.62934689 | -2.08285817 | -3.03891749 |

|   |             |             |             |
|---|-------------|-------------|-------------|
| 8 | 2.63835933  | 2.10042462  | -3.01897442 |
| 6 | -1.35333688 | 1.23787446  | 0.23113659  |
| 6 | -1.35864451 | -1.23419379 | 0.21934416  |
| 1 | 0.54487538  | -4.63686332 | 0.59707432  |
| 6 | -1.33268968 | -3.68642618 | 0.18414501  |
| 6 | -2.05045707 | -2.46794821 | 0.03612812  |
| 6 | -2.04860956 | 0.00409465  | 0.06440366  |
| 6 | -1.31685192 | 3.69019708  | 0.21933372  |
| 1 | 0.56476804  | 4.62858079  | 0.64127214  |
| 1 | -1.84469790 | 4.63544085  | 0.08075395  |
| 6 | -2.03984174 | 2.47627979  | 0.05971377  |
| 1 | -1.86458648 | -4.62802969 | 0.03656425  |
| 6 | -3.43333714 | -2.43078258 | -0.29385967 |
| 6 | -3.43288778 | 0.00866577  | -0.27080430 |
| 6 | -3.42286185 | 2.44820258  | -0.27058483 |
| 6 | -4.09390151 | 1.25811516  | -0.42894766 |
| 1 | -3.94851447 | 3.39590355  | -0.40151075 |
| 1 | -3.96305163 | -3.37492544 | -0.43381069 |
| 6 | -4.09925720 | -1.23636816 | -0.44084750 |
| 1 | -5.16039857 | -1.22953140 | -0.69775434 |
| 1 | -5.15505728 | 1.25828616  | -0.68588603 |

**la-Mo**

|   |             |            |             |
|---|-------------|------------|-------------|
| 6 | -2.54530583 | 2.59291012 | -0.58799763 |
| 6 | -2.63856072 | 1.16971747 | -0.57233769 |
| 6 | -1.44509074 | 0.40222459 | -0.52531228 |
| 6 | -0.17365427 | 1.06289079 | -0.49126855 |
| 6 | -0.11059857 | 2.49658768 | -0.51108163 |
| 6 | -1.33491834 | 3.23361004 | -0.55155143 |
| 6 | 1.04323518  | 0.28007167 | -0.48413951 |
| 6 | 2.32187214  | 0.93172262 | -0.49652100 |
| 6 | 2.36284133  | 2.37184751 | -0.45676858 |

|    |             |             |             |
|----|-------------|-------------|-------------|
| 6  | 1.18269178  | 3.13095022  | -0.46326981 |
| 6  | 0.96938554  | -1.15100049 | -0.51080208 |
| 6  | 2.16291939  | -1.91916532 | -0.54331976 |
| 6  | 3.41949015  | -1.24433049 | -0.55178672 |
| 6  | 3.50050315  | 0.12288690  | -0.52225579 |
| 6  | -0.30123119 | -1.79457875 | -0.52830253 |
| 6  | -0.37136956 | -3.21558372 | -0.54953061 |
| 6  | 0.83899198  | -3.96304904 | -0.56041415 |
| 6  | 2.06254739  | -3.33756664 | -0.56281383 |
| 6  | -1.50386536 | -1.02095365 | -0.53555093 |
| 6  | -2.76755260 | -1.67400954 | -0.56401540 |
| 6  | -2.80544625 | -3.09753393 | -0.57205080 |
| 6  | -1.65100233 | -3.84024199 | -0.56506123 |
| 6  | -3.88751988 | 0.49015117  | -0.59879600 |
| 6  | -3.94941802 | -0.88257188 | -0.58935593 |
| 1  | -3.46794145 | 3.17487293  | -0.62131805 |
| 1  | -1.28370998 | 4.32322859  | -0.55811018 |
| 1  | 3.33098999  | 2.87078897  | -0.44392006 |
| 1  | 1.23523097  | 4.21889931  | -0.45574168 |
| 1  | 4.33182468  | -1.84284355 | -0.57383785 |
| 1  | 4.47085667  | 0.62121813  | -0.52314709 |
| 1  | 0.77986137  | -5.05290994 | -0.57165916 |
| 1  | 2.98125336  | -3.92663209 | -0.57732051 |
| 1  | -3.77769387 | -3.59348178 | -0.58750190 |
| 1  | -1.69916799 | -4.93067817 | -0.57492153 |
| 1  | -4.80431314 | 1.08180470  | -0.62441351 |
| 1  | -4.91654542 | -1.38834911 | -0.60607325 |
| 42 | 1.14929348  | 1.80075322  | 1.48515889  |
| 6  | 0.34606228  | 0.57547490  | 2.80612039  |
| 6  | 0.51217129  | 3.26280645  | 2.60240668  |
| 6  | 2.73495828  | 1.82060100  | 2.61533633  |
| 8  | 3.69862093  | 1.84016111  | 3.27406769  |



8 -0.13307358 -0.15505963 3.57570130  
8 0.13237777 4.15435961 3.25347737

**lb-Mo**

6 -2.42988471 2.84900609 -0.63904916  
6 -2.49433503 1.44027619 -0.47692044  
6 -1.27162836 0.70007152 -0.48066713  
6 -0.01409974 1.38224483 -0.62664812  
6 0.00812924 2.80636408 -0.80521870  
6 -1.22592037 3.50337558 -0.79786523  
6 1.21463453 0.63676260 -0.67623416  
6 2.45877486 1.31414702 -0.86649837  
6 2.44115304 2.72494922 -1.02215511  
6 1.26181244 3.44002222 -0.99352490  
6 1.18647662 -0.79226958 -0.51776440  
6 2.40875638 -1.54171542 -0.58749239  
6 3.62098544 -0.83293543 -0.77955213  
6 3.64758368 0.53983883 -0.91272926  
6 -0.06696386 -1.48180385 -0.37142000  
6 -0.09442270 -2.90644381 -0.25927872  
6 1.13667351 -3.61081267 -0.31559683  
6 2.33861931 -2.95275715 -0.47459218  
6 -1.29138559 -0.72915469 -0.32284401  
6 -2.54588191 -1.41551431 -0.19776045  
6 -2.53042582 -2.82875414 -0.09158970  
6 -1.35326025 -3.54739256 -0.11973446  
6 -3.71339138 0.72731394 -0.33377413  
6 -3.73579600 -0.64557929 -0.20090498  
1 -3.36203171 3.41621621 -0.63700786  
1 -1.20979625 4.58754909 -0.92276230  
1 3.38966039 3.24426179 -1.16802316  
1 1.28123996 4.52411107 -1.11868463

|    |             |             |             |
|----|-------------|-------------|-------------|
| 1  | 4.55231447  | -1.40048827 | -0.82199431 |
| 1  | 4.59856915  | 1.05466604  | -1.05836227 |
| 1  | 1.11821936  | -4.69850803 | -0.23070068 |
| 1  | 3.26824281  | -3.52312762 | -0.51664894 |
| 1  | -3.48285097 | -3.35119551 | 0.01439540  |
| 1  | -1.37682152 | -4.63495769 | -0.03443172 |
| 1  | -4.64817323 | 1.29016825  | -0.33111703 |
| 1  | -4.68982438 | -1.16511870 | -0.09507507 |
| 42 | 0.12305429  | 0.14393268  | 1.51764966  |
| 6  | -1.11540275 | -0.47350035 | 2.87562212  |
| 6  | 0.24463487  | 1.77959211  | 2.55146952  |
| 6  | 1.52724190  | -0.53831273 | 2.66732758  |
| 8  | 2.38350889  | -0.95796131 | 3.34308982  |
| 8  | -1.87474959 | -0.85356641 | 3.67867969  |
| 8  | 0.31676099  | 2.77700016  | 3.15638915  |

**TS(la-b)-Mo**

|   |             |             |             |
|---|-------------|-------------|-------------|
| 6 | -2.57872938 | 2.71860689  | -0.70599991 |
| 6 | -2.63373843 | 1.29668026  | -0.71147774 |
| 6 | -1.41535630 | 0.56517969  | -0.64667441 |
| 6 | -0.17172696 | 1.26688995  | -0.58437712 |
| 6 | -0.14511804 | 2.69570271  | -0.58323091 |
| 6 | -1.38298865 | 3.39410229  | -0.64235646 |
| 6 | 1.06555869  | 0.53288076  | -0.53690297 |
| 6 | 2.32149048  | 1.22882464  | -0.48409925 |
| 6 | 2.29835700  | 2.65813943  | -0.48579613 |
| 6 | 1.11690643  | 3.36033796  | -0.55289062 |
| 6 | 1.04186056  | -0.90332769 | -0.52326156 |
| 6 | 2.26975891  | -1.63078975 | -0.51004860 |
| 6 | 3.49726876  | -0.91302623 | -0.49392830 |
| 6 | 3.52230621  | 0.46211251  | -0.46366728 |
| 6 | -0.20892648 | -1.59169647 | -0.58801229 |

|    |             |             |             |
|----|-------------|-------------|-------------|
| 6  | -0.22812588 | -3.01439291 | -0.60089822 |
| 6  | 1.00918333  | -3.71528752 | -0.55694795 |
| 6  | 2.21253090  | -3.05091678 | -0.52011477 |
| 6  | -1.43219540 | -0.86107239 | -0.65850066 |
| 6  | -2.67200525 | -1.55334143 | -0.72494328 |
| 6  | -2.66199668 | -2.97639006 | -0.72477639 |
| 6  | -1.48357819 | -3.68080250 | -0.66557820 |
| 6  | -3.85890182 | 0.57644939  | -0.77719021 |
| 6  | -3.87689667 | -0.79767549 | -0.78329678 |
| 1  | -3.51646516 | 3.27553823  | -0.74968245 |
| 1  | -1.36743239 | 4.48502243  | -0.63747964 |
| 1  | 3.24945882  | 3.19073958  | -0.44071456 |
| 1  | 1.13075790  | 4.45094609  | -0.55319484 |
| 1  | 4.43145689  | -1.47599725 | -0.48076512 |
| 1  | 4.47461692  | 0.99352812  | -0.42881364 |
| 1  | 0.98920072  | -4.80668485 | -0.55938928 |
| 1  | 3.14842157  | -3.61139369 | -0.49617468 |
| 1  | -3.61536085 | -3.50563097 | -0.77144281 |
| 1  | -1.49598253 | -4.77216686 | -0.66778084 |
| 1  | -4.79368498 | 1.13805656  | -0.82050866 |
| 1  | -4.82684217 | -1.33284854 | -0.83023412 |
| 42 | 0.91811331  | 0.84014718  | 1.84254723  |
| 6  | -0.44277592 | 0.22196053  | 3.03858169  |
| 6  | 1.09293173  | 2.36065483  | 2.98550489  |
| 6  | 2.16067205  | -0.04994007 | 2.98684140  |
| 8  | 2.92813201  | -0.60933506 | 3.67518662  |
| 8  | -1.27678733 | -0.16771304 | 3.76445771  |
| 8  | 1.20663229  | 3.30792950  | 3.66803109  |

**TS' (la-b)-Mo**

|   |             |            |             |
|---|-------------|------------|-------------|
| 6 | -2.53898902 | 2.76279994 | -0.81406723 |
| 6 | -2.59982609 | 1.34526082 | -0.73355234 |

|   |             |             |             |
|---|-------------|-------------|-------------|
| 6 | -1.38120704 | 0.61316096  | -0.64751646 |
| 6 | -0.13524031 | 1.31487463  | -0.64074926 |
| 6 | -0.10338357 | 2.73910682  | -0.72815853 |
| 6 | -1.33805772 | 3.43554636  | -0.81481999 |
| 6 | 1.09590028  | 0.57343850  | -0.56621331 |
| 6 | 2.34935422  | 1.27082997  | -0.52653519 |
| 6 | 2.33386397  | 2.69543315  | -0.61655275 |
| 6 | 1.15950968  | 3.39938119  | -0.73239594 |
| 6 | 1.07306491  | -0.86434750 | -0.50931518 |
| 6 | 2.29908330  | -1.59383756 | -0.46679113 |
| 6 | 3.52840100  | -0.87299654 | -0.47461435 |
| 6 | 3.55068560  | 0.50086144  | -0.48410161 |
| 6 | -0.18175279 | -1.55009931 | -0.51706319 |
| 6 | -0.20527002 | -2.97344615 | -0.47312419 |
| 6 | 1.03012417  | -3.67427792 | -0.42586201 |
| 6 | 2.23691034  | -3.01208776 | -0.42592535 |
| 6 | -1.40423865 | -0.81469874 | -0.59772658 |
| 6 | -2.64536415 | -1.50374772 | -0.61263111 |
| 6 | -2.64039741 | -2.92662353 | -0.55105984 |
| 6 | -1.46534552 | -3.63508468 | -0.48512776 |
| 6 | -3.82797471 | 0.62604323  | -0.74206753 |
| 6 | -3.84936103 | -0.74618459 | -0.68253504 |
| 1 | -3.47505915 | 3.32084785  | -0.87581119 |
| 1 | -1.31989673 | 4.52469921  | -0.87755426 |
| 1 | 3.28879648  | 3.22338376  | -0.60245241 |
| 1 | 1.17902446  | 4.48761953  | -0.80344918 |
| 1 | 4.46283834  | -1.43487411 | -0.44606922 |
| 1 | 4.50360514  | 1.03244169  | -0.47017910 |
| 1 | 1.00820382  | -4.76494643 | -0.38818759 |
| 1 | 3.17097396  | -3.57483212 | -0.38900666 |
| 1 | -3.59704895 | -3.45191901 | -0.55604460 |
| 1 | -1.48327789 | -4.72538497 | -0.44058247 |

|    |             |             |             |
|----|-------------|-------------|-------------|
| 1  | -4.76196471 | 1.18790610  | -0.79714152 |
| 1  | -4.80142036 | -1.27976211 | -0.68701460 |
| 42 | 0.79636801  | 0.54987701  | 1.79579594  |
| 6  | -0.54945025 | -0.12464006 | 2.98069974  |
| 6  | 0.81128834  | 2.13057328  | 2.87029298  |
| 6  | 2.08645580  | -0.16885055 | 3.00924472  |
| 8  | 2.89214810  | -0.60926905 | 3.73866747  |
| 8  | -1.38109707 | -0.54263363 | 3.69305714  |
| 8  | 0.82902321  | 3.11045861  | 3.51424069  |

### IM(la-b)-Mo

|   |             |             |             |
|---|-------------|-------------|-------------|
| 6 | -2.55408817 | 2.75600076  | -0.80355771 |
| 6 | -2.61518196 | 1.33799341  | -0.72478269 |
| 6 | -1.39691411 | 0.60566991  | -0.64124238 |
| 6 | -0.15115121 | 1.30696623  | -0.63472990 |
| 6 | -0.11839136 | 2.73102543  | -0.72505687 |
| 6 | -1.35333159 | 3.42834543  | -0.80752808 |
| 6 | 1.08077121  | 0.56587868  | -0.56433911 |
| 6 | 2.33623935  | 1.26287572  | -0.54026853 |
| 6 | 2.32008174  | 2.68726314  | -0.63227621 |
| 6 | 1.14442817  | 3.39107597  | -0.73994432 |
| 6 | 1.05618141  | -0.87215914 | -0.50673540 |
| 6 | 2.28228257  | -1.60188463 | -0.47023061 |
| 6 | 3.51238196  | -0.88270260 | -0.48873514 |
| 6 | 3.53673307  | 0.49142561  | -0.50336757 |
| 6 | -0.19860984 | -1.55717568 | -0.51428814 |
| 6 | -0.22269797 | -2.98018538 | -0.47113967 |
| 6 | 1.01277429  | -3.68174053 | -0.42511675 |
| 6 | 2.21968502  | -3.02051508 | -0.42822513 |
| 6 | -1.42055556 | -0.82164590 | -0.59197707 |
| 6 | -2.66222782 | -1.51041518 | -0.60574266 |
| 6 | -2.65788716 | -2.93319373 | -0.54565880 |

|    |             |             |             |
|----|-------------|-------------|-------------|
| 6  | -1.48269957 | -3.64179492 | -0.48200649 |
| 6  | -3.84376549 | 0.61969473  | -0.73229905 |
| 6  | -3.86600050 | -0.75264497 | -0.67370634 |
| 1  | -3.49020644 | 3.31432285  | -0.86250492 |
| 1  | -1.33487070 | 4.51745835  | -0.87082313 |
| 1  | 3.27509576  | 3.21522308  | -0.62699051 |
| 1  | 1.16355860  | 4.47916008  | -0.81304653 |
| 1  | 4.44625864  | -1.44567082 | -0.46475559 |
| 1  | 4.49049018  | 1.02165113  | -0.49833324 |
| 1  | 0.99030184  | -4.77241219 | -0.38707705 |
| 1  | 3.15360418  | -3.58367726 | -0.39422811 |
| 1  | -3.61465798 | -3.45827327 | -0.55007023 |
| 1  | -1.50059692 | -4.73215538 | -0.43849723 |
| 1  | -4.77746119 | 1.18222429  | -0.78589871 |
| 1  | -4.81831305 | -1.28577199 | -0.67762125 |
| 42 | 0.87026476  | 0.58704246  | 1.79931434  |
| 6  | -0.46577131 | -0.08695660 | 2.99549341  |
| 6  | 0.88874497  | 2.17068498  | 2.86983171  |
| 6  | 2.17012961  | -0.12898909 | 3.00416407  |
| 8  | 2.98076626  | -0.56981319 | 3.72778974  |
| 8  | -1.29111036 | -0.50460721 | 3.71530263  |
| 8  | 0.90571667  | 3.15240248  | 3.51090524  |

### TS(la-a)-Mo

|   |             |             |            |
|---|-------------|-------------|------------|
| 6 | 2.74390121  | -1.26882285 | 1.27752184 |
| 6 | 2.06448496  | -0.00992949 | 1.15109930 |
| 6 | 0.67776381  | -0.00511735 | 0.76629502 |
| 6 | -0.01389149 | -1.24116278 | 0.57954348 |
| 6 | 0.68127410  | -2.47906183 | 0.71851112 |
| 6 | 2.06739705  | -2.45160091 | 1.03696737 |
| 1 | 3.78680154  | -1.28015104 | 1.59345786 |
| 1 | 2.60107430  | -3.39996574 | 1.12193078 |

|    |             |             |             |
|----|-------------|-------------|-------------|
| 6  | -0.03034168 | -3.69087004 | 0.52025940  |
| 6  | 2.74930257  | 1.24477154  | 1.28941443  |
| 6  | 2.07788170  | 2.43268804  | 1.06017776  |
| 6  | 0.69190514  | 2.46913417  | 0.74203366  |
| 6  | -0.00856464 | 1.23560603  | 0.59130894  |
| 1  | 3.79224124  | 1.24861638  | 1.60540466  |
| 1  | 2.61563106  | 3.37789738  | 1.15415045  |
| 6  | -0.01449738 | 3.68582163  | 0.55533119  |
| 42 | 2.86324448  | -0.00118611 | -1.04320105 |
| 6  | 4.76416024  | -0.00479990 | -1.17190674 |
| 6  | 2.87912857  | -1.33346863 | -2.43643637 |
| 6  | 2.88525243  | 1.34457140  | -2.42332820 |
| 8  | 5.93584583  | -0.00706868 | -1.23827765 |
| 8  | 2.89503926  | -2.15613595 | -3.26913011 |
| 8  | 2.90499214  | 2.17529494  | -3.24790323 |
| 6  | -1.39335568 | 1.23743300  | 0.26017724  |
| 6  | -1.39866769 | -1.23389129 | 0.24843570  |
| 1  | 0.50716060  | -4.63567558 | 0.61710647  |
| 6  | -1.37106575 | -3.68531413 | 0.20954003  |
| 6  | -2.09018981 | -2.46720102 | 0.06568365  |
| 6  | -2.08919323 | 0.00401433  | 0.09569860  |
| 6  | -1.35522204 | 3.68897772  | 0.24459622  |
| 1  | 0.52705682  | 4.62734507  | 0.66115071  |
| 1  | -1.88283816 | 4.63423942  | 0.10650832  |
| 6  | -2.07956842 | 2.47538372  | 0.08917562  |
| 1  | -1.90273155 | -4.62694679 | 0.06248130  |
| 6  | -3.47410117 | -2.43035724 | -0.25974414 |
| 6  | -3.47415825 | 0.00856417  | -0.23550340 |
| 6  | -3.46361699 | 2.44758266  | -0.23655754 |
| 6  | -4.13548080 | 1.25785973  | -0.39180908 |
| 1  | -3.98930596 | 3.39523381  | -0.36626793 |
| 1  | -4.00385388 | -3.37446491 | -0.39844848 |

|   |             |             |             |
|---|-------------|-------------|-------------|
| 6 | -4.14084197 | -1.23633718 | -0.40366412 |
| 1 | -5.20270013 | -1.22976325 | -0.65680442 |
| 1 | -5.19735237 | 1.25825754  | -0.64497870 |

**la-W**

|   |             |             |             |
|---|-------------|-------------|-------------|
| 6 | -2.54291592 | 2.60038775  | -0.57861987 |
| 6 | -2.63572959 | 1.17571195  | -0.56175682 |
| 6 | -1.44331667 | 0.40769562  | -0.51373710 |
| 6 | -0.17017994 | 1.06939890  | -0.48075954 |
| 6 | -0.10726250 | 2.50522454  | -0.50414279 |
| 6 | -1.33425935 | 3.24167723  | -0.54295121 |
| 6 | 1.04768982  | 0.28472604  | -0.47441119 |
| 6 | 2.32929229  | 0.93534616  | -0.49149153 |
| 6 | 2.37153798  | 2.37693935  | -0.45073787 |
| 6 | 1.18764930  | 3.13972986  | -0.45692264 |
| 6 | 0.97156506  | -1.14821441 | -0.50117481 |
| 6 | 2.16405423  | -1.91678725 | -0.53680934 |
| 6 | 3.42309586  | -1.24351823 | -0.54762047 |
| 6 | 3.50725992  | 0.12228450  | -0.51779328 |
| 6 | -0.29913955 | -1.78962205 | -0.51875276 |
| 6 | -0.37032534 | -3.21042306 | -0.54237412 |
| 6 | 0.83899311  | -3.95894824 | -0.55532715 |
| 6 | 2.06350569  | -3.33450426 | -0.55815247 |
| 6 | -1.50208582 | -1.01456405 | -0.52500924 |
| 6 | -2.76624158 | -1.66673237 | -0.55483053 |
| 6 | -2.80466608 | -3.09076263 | -0.56437818 |
| 6 | -1.65106243 | -3.83402954 | -0.55838155 |
| 6 | -3.88495697 | 0.49809480  | -0.58907236 |
| 6 | -3.94752071 | -0.87499658 | -0.58021011 |
| 1 | -3.46591647 | 3.18169132  | -0.61276388 |
| 1 | -1.28312785 | 4.33122175  | -0.55130823 |
| 1 | 3.33939750  | 2.87570765  | -0.43455231 |



|    |             |             |             |
|----|-------------|-------------|-------------|
| 1  | 1.24170408  | 4.22726282  | -0.44547819 |
| 1  | 4.33412197  | -1.84387999 | -0.57222944 |
| 1  | 4.47830071  | 0.61913393  | -0.52137500 |
| 1  | 0.77871806  | -5.04871672 | -0.56805509 |
| 1  | 2.98170788  | -3.92430938 | -0.57448825 |
| 1  | -3.77723580 | -3.58602872 | -0.58041628 |
| 1  | -1.69998201 | -4.92440525 | -0.56961961 |
| 1  | -4.80136957 | 1.09033759  | -0.61494193 |
| 1  | -4.91483296 | -1.38036007 | -0.59765468 |
| 74 | 1.15040857  | 1.79721495  | 1.45927218  |
| 6  | 0.33301876  | 0.53846511  | 2.74397521  |
| 6  | 0.48856220  | 3.24859520  | 2.58754933  |
| 6  | 2.73705482  | 1.80098954  | 2.59949610  |
| 8  | 3.70803570  | 1.80747156  | 3.25065960  |
| 8  | -0.16112301 | -0.22278597 | 3.47596060  |
| 8  | 0.08757662  | 4.13828065  | 3.23138678  |

### **Ib-W**

|   |             |             |             |
|---|-------------|-------------|-------------|
| 6 | -2.43054183 | 2.85102005  | -0.63191813 |
| 6 | -2.49713011 | 1.44356774  | -0.46825151 |
| 6 | -1.27300295 | 0.70275812  | -0.46928309 |
| 6 | -0.01272721 | 1.38521250  | -0.61023291 |
| 6 | 0.00944488  | 2.81200282  | -0.79161503 |
| 6 | -1.22477906 | 3.50596361  | -0.78764044 |
| 6 | 1.21776198  | 0.63918321  | -0.66498020 |
| 6 | 2.46301657  | 1.31698752  | -0.85789224 |
| 6 | 2.44322089  | 2.72658682  | -1.01471719 |
| 6 | 1.26267587  | 3.44248353  | -0.98300963 |
| 6 | 1.18869938  | -0.79117083 | -0.50075667 |
| 6 | 2.41327406  | -1.54244768 | -0.57278469 |
| 6 | 3.62279221  | -0.83269336 | -0.76826287 |
| 6 | 3.64965110  | 0.54122473  | -0.90498251 |

|    |             |             |             |
|----|-------------|-------------|-------------|
| 6  | -0.06625089 | -1.48302627 | -0.35920427 |
| 6  | -0.09400385 | -2.90937470 | -0.24919851 |
| 6  | 1.13708323  | -3.61152790 | -0.30688880 |
| 6  | 2.34045597  | -2.95218136 | -0.46299742 |
| 6  | -1.29123991 | -0.72784277 | -0.30590598 |
| 6  | -2.54856075 | -1.41573578 | -0.18295029 |
| 6  | -2.53104119 | -2.82783032 | -0.08028070 |
| 6  | -1.35308534 | -3.54794118 | -0.11125947 |
| 6  | -3.71434684 | 0.72922606  | -0.32654624 |
| 6  | -3.73618709 | -0.64485604 | -0.19017792 |
| 1  | -3.36215374 | 3.41902057  | -0.63375653 |
| 1  | -1.20972873 | 4.58993004  | -0.91444223 |
| 1  | 3.39073476  | 3.24660633  | -1.16412985 |
| 1  | 1.28301405  | 4.52631510  | -1.11022008 |
| 1  | 4.55442577  | -1.39960224 | -0.81258700 |
| 1  | 4.60092584  | 1.05441164  | -1.05411864 |
| 1  | 1.11962241  | -4.69946252 | -0.22553219 |
| 1  | 3.26933784  | -3.52363068 | -0.50674040 |
| 1  | -3.48313377 | -3.35126927 | 0.02374774  |
| 1  | -1.37834266 | -4.63567602 | -0.02927168 |
| 1  | -4.64997566 | 1.29058424  | -0.32753737 |
| 1  | -4.69085743 | -1.16362865 | -0.08639601 |
| 74 | 0.11983989  | 0.14116409  | 1.48105596  |
| 6  | -1.12962667 | -0.48751222 | 2.83571443  |
| 6  | 0.23997157  | 1.79016700  | 2.50966687  |
| 6  | 1.53714594  | -0.54903558 | 2.62391661  |
| 8  | 2.40681781  | -0.97974114 | 3.27789180  |
| 8  | -1.90340782 | -0.88018766 | 3.62097752  |
| 8  | 0.31021147  | 2.80195846  | 3.09349774  |

**TS(la-b)-W**

|   |             |            |             |
|---|-------------|------------|-------------|
| 6 | -2.58052343 | 2.71055939 | -0.66565361 |
|---|-------------|------------|-------------|

|   |             |             |             |
|---|-------------|-------------|-------------|
| 6 | -2.63369904 | 1.28794471  | -0.68780529 |
| 6 | -1.41561440 | 0.55807920  | -0.62685641 |
| 6 | -0.17226336 | 1.26261648  | -0.55466456 |
| 6 | -0.14643177 | 2.69315495  | -0.53904062 |
| 6 | -1.38716715 | 3.38847269  | -0.59065646 |
| 6 | 1.07069202  | 0.53168180  | -0.51820913 |
| 6 | 2.32865970  | 1.23014147  | -0.45959737 |
| 6 | 2.30014633  | 2.66111326  | -0.46203310 |
| 6 | 1.11622138  | 3.36033797  | -0.52422573 |
| 6 | 1.04775206  | -0.90753796 | -0.50063828 |
| 6 | 2.27736598  | -1.63268057 | -0.49544510 |
| 6 | 3.50398582  | -0.91357574 | -0.48231773 |
| 6 | 3.52847989  | 0.46183089  | -0.44503975 |
| 6 | -0.20327704 | -1.59591300 | -0.57375693 |
| 6 | -0.22005470 | -3.01825598 | -0.59351305 |
| 6 | 1.01823358  | -3.71764368 | -0.54909639 |
| 6 | 2.22120536  | -3.05248663 | -0.51028516 |
| 6 | -1.42861987 | -0.86754501 | -0.65009529 |
| 6 | -2.66616243 | -1.56131448 | -0.72564962 |
| 6 | -2.65352760 | -2.98461030 | -0.73155833 |
| 6 | -1.47417113 | -3.68672488 | -0.66805298 |
| 6 | -3.85757019 | 0.56617623  | -0.76460155 |
| 6 | -3.87288301 | -0.80769117 | -0.78326932 |
| 1 | -3.51917125 | 3.26622656  | -0.70510097 |
| 1 | -1.37445078 | 4.47921439  | -0.57431414 |
| 1 | 3.24987982  | 3.19616349  | -0.42027119 |
| 1 | 1.12764858  | 4.45077820  | -0.52383196 |
| 1 | 4.43873210  | -1.47542866 | -0.47400155 |
| 1 | 4.48077752  | 0.99312555  | -0.40934761 |
| 1 | 0.99944862  | -4.80903081 | -0.55518462 |
| 1 | 3.15749177  | -3.61227659 | -0.48896759 |
| 1 | -3.60555765 | -3.51549754 | -0.78533207 |

|    |             |             |             |
|----|-------------|-------------|-------------|
| 1  | -1.48428420 | -4.77807610 | -0.67475958 |
| 1  | -4.79320557 | 1.12650128  | -0.80516631 |
| 1  | -4.82146995 | -1.34457602 | -0.83755980 |
| 74 | 0.90016942  | 0.86006757  | 1.78611917  |
| 6  | -0.50616153 | 0.29473061  | 2.96854576  |
| 6  | 1.14143660  | 2.40082468  | 2.90258498  |
| 6  | 2.11543935  | -0.09500505 | 2.91994449  |
| 8  | 2.87491974  | -0.70772678 | 3.57519237  |
| 8  | -1.38033395 | -0.07141731 | 3.66243226  |
| 8  | 1.29791435  | 3.37527288  | 3.54108013  |

**TS'(la-b)-W**

|   |             |             |             |
|---|-------------|-------------|-------------|
| 6 | -2.53066000 | 2.76896766  | -0.79773638 |
| 6 | -2.59251118 | 1.35295821  | -0.70815252 |
| 6 | -1.37349997 | 0.62040862  | -0.62366310 |
| 6 | -0.12715286 | 1.32427373  | -0.62848895 |
| 6 | -0.09454090 | 2.74901483  | -0.72163460 |
| 6 | -1.32911106 | 3.44297292  | -0.80763843 |
| 6 | 1.10499508  | 0.57895691  | -0.56050686 |
| 6 | 2.35946032  | 1.27830474  | -0.49943726 |
| 6 | 2.34196872  | 2.70346929  | -0.59561455 |
| 6 | 1.16965384  | 3.40784866  | -0.72708296 |
| 6 | 1.08479896  | -0.86112843 | -0.49669695 |
| 6 | 2.31205578  | -1.59064678 | -0.46018417 |
| 6 | 3.54078184  | -0.86788587 | -0.46950647 |
| 6 | 3.56061025  | 0.50592612  | -0.46316332 |
| 6 | -0.17254766 | -1.54516748 | -0.49293503 |
| 6 | -0.19574199 | -2.96895891 | -0.44733583 |
| 6 | 1.03944571  | -3.66880511 | -0.40949509 |
| 6 | 2.24800852  | -3.00743024 | -0.41889024 |
| 6 | -1.39599679 | -0.80887037 | -0.57514931 |
| 6 | -2.63583035 | -1.49693120 | -0.58346574 |

|    |             |             |             |
|----|-------------|-------------|-------------|
| 6  | -2.63106866 | -2.92039969 | -0.51670365 |
| 6  | -1.45695125 | -3.62969169 | -0.45222400 |
| 6  | -3.82075618 | 0.63277978  | -0.70952719 |
| 6  | -3.84081832 | -0.73895723 | -0.64842102 |
| 1  | -3.46670536 | 3.32710150  | -0.85865732 |
| 1  | -1.31242037 | 4.53175081  | -0.87556336 |
| 1  | 3.29678530  | 3.23140924  | -0.57551661 |
| 1  | 1.19093210  | 4.49547810  | -0.80399225 |
| 1  | 4.47603823  | -1.42833281 | -0.44713309 |
| 1  | 4.51308146  | 1.03809556  | -0.44327399 |
| 1  | 1.01772087  | -4.75942246 | -0.37096197 |
| 1  | 3.18132696  | -3.57156675 | -0.38729489 |
| 1  | -3.58817063 | -3.44481375 | -0.51564794 |
| 1  | -1.47562048 | -4.71975984 | -0.40394073 |
| 1  | -4.75521375 | 1.19409700  | -0.76090501 |
| 1  | -4.79259331 | -1.27297601 | -0.64680853 |
| 74 | 0.75348425  | 0.52188397  | 1.72785717  |
| 6  | -0.62207642 | -0.16835821 | 2.88342301  |
| 6  | 0.76792409  | 2.12104455  | 2.78832151  |
| 6  | 2.05717994  | -0.21188181 | 2.92959884  |
| 8  | 2.88695404  | -0.66677952 | 3.62634336  |
| 8  | -1.48412202 | -0.60419089 | 3.55118753  |
| 8  | 0.79090324  | 3.12621285  | 3.39661788  |

**IM(la-b)-W**

|   |             |            |             |
|---|-------------|------------|-------------|
| 6 | -2.56190989 | 2.74485275 | -0.80543049 |
| 6 | -2.62118892 | 1.32739435 | -0.71917056 |
| 6 | -1.40208677 | 0.59812558 | -0.62507457 |
| 6 | -0.15860056 | 1.30471517 | -0.61518758 |
| 6 | -0.12658214 | 2.72863925 | -0.71643581 |
| 6 | -1.36282368 | 3.42125280 | -0.80888699 |
| 6 | 1.07727367  | 0.56432878 | -0.53998282 |

|    |             |             |             |
|----|-------------|-------------|-------------|
| 6  | 2.33442125  | 1.26662467  | -0.50394229 |
| 6  | 2.31217296  | 2.69105755  | -0.60832743 |
| 6  | 1.13575879  | 3.39110059  | -0.73434219 |
| 6  | 1.05602563  | -0.87672077 | -0.47544229 |
| 6  | 2.28505166  | -1.60278889 | -0.44016714 |
| 6  | 3.51400603  | -0.88053958 | -0.46112626 |
| 6  | 3.53528529  | 0.49407338  | -0.46716163 |
| 6  | -0.19889870 | -1.56265257 | -0.48670496 |
| 6  | -0.21980971 | -2.98565126 | -0.44373197 |
| 6  | 1.01734775  | -3.68363826 | -0.39587365 |
| 6  | 2.22404875  | -3.02085393 | -0.39863631 |
| 6  | -1.42235635 | -0.82974402 | -0.57517124 |
| 6  | -2.66143261 | -1.52083331 | -0.59498836 |
| 6  | -2.65454655 | -2.94397215 | -0.53184747 |
| 6  | -1.47863518 | -3.65008449 | -0.46015371 |
| 6  | -3.84835512 | 0.60602007  | -0.73159916 |
| 6  | -3.86721080 | -0.76599928 | -0.67073893 |
| 1  | -3.49895904 | 3.30082134  | -0.87167436 |
| 1  | -1.34765112 | 4.50988284  | -0.87932784 |
| 1  | 3.26553489  | 3.22192170  | -0.59994225 |
| 1  | 1.15329922  | 4.47823548  | -0.81784669 |
| 1  | 4.44910198  | -1.44114302 | -0.43935414 |
| 1  | 4.48823674  | 1.02567756  | -0.45834393 |
| 1  | 0.99722551  | -4.77436962 | -0.35773707 |
| 1  | 3.15843537  | -3.58305505 | -0.36451766 |
| 1  | -3.61023148 | -3.47087437 | -0.54046531 |
| 1  | -1.49447026 | -4.74038917 | -0.41522273 |
| 1  | -4.78306533 | 1.16614580  | -0.79158348 |
| 1  | -4.81801491 | -1.30166916 | -0.67857781 |
| 74 | 0.88362160  | 0.60529200  | 1.74971697  |
| 6  | -0.48260166 | -0.06711764 | 2.92677110  |
| 6  | 0.90877252  | 2.21987177  | 2.78687803  |

|   |             |             |            |
|---|-------------|-------------|------------|
| 6 | 2.19861423  | -0.12441018 | 2.94235240 |
| 8 | 3.03274669  | -0.58342030 | 3.63105465 |
| 8 | -1.33868611 | -0.49113005 | 3.60965204 |
| 8 | 0.93113635  | 3.23502366  | 3.37829188 |

**TS(la-a)-W**

|    |             |             |             |
|----|-------------|-------------|-------------|
| 6  | 2.76871924  | -1.27108071 | 1.31191270  |
| 6  | 2.08513097  | -0.01015463 | 1.19384333  |
| 6  | 0.70558753  | -0.00517117 | 0.77051083  |
| 6  | 0.01505944  | -1.24292509 | 0.57594068  |
| 6  | 0.70792850  | -2.48100040 | 0.72351951  |
| 6  | 2.09371952  | -2.45147034 | 1.04763084  |
| 1  | 3.80630790  | -1.28505736 | 1.64378029  |
| 1  | 2.62996525  | -3.39928765 | 1.12291112  |
| 6  | -0.00000271 | -3.69193974 | 0.51717320  |
| 6  | 2.77412551  | 1.24664055  | 1.32392270  |
| 6  | 2.10420557  | 2.43238174  | 1.07092347  |
| 6  | 0.71855346  | 2.47095594  | 0.74715084  |
| 6  | 0.02036599  | 1.23733766  | 0.58778048  |
| 1  | 3.81175869  | 1.25299412  | 1.65588554  |
| 1  | 2.64451550  | 3.37712632  | 1.15522602  |
| 6  | 0.01583065  | 3.68683619  | 0.55240653  |
| 74 | 2.80478028  | -0.00143117 | -0.96213312 |
| 6  | 4.70244506  | -0.00427607 | -1.22643853 |
| 6  | 2.68852516  | -1.35723802 | -2.33720104 |
| 6  | 2.69437034  | 1.36777966  | -2.32434859 |
| 8  | 5.87179611  | -0.00623121 | -1.34815098 |
| 8  | 2.60235509  | -2.20462514 | -3.14361873 |
| 8  | 2.61184827  | 2.22308874  | -3.12274389 |
| 6  | -1.36000994 | 1.23807994  | 0.24292804  |
| 6  | -1.36532234 | -1.23447524 | 0.23110605  |
| 1  | 0.53695720  | -4.63664746 | 0.61742039  |

|   |             |             |             |
|---|-------------|-------------|-------------|
| 6 | -1.33837606 | -3.68645527 | 0.19258189  |
| 6 | -2.05510092 | -2.46861759 | 0.04129527  |
| 6 | -2.05388277 | 0.00406120  | 0.07174365  |
| 6 | -1.32255404 | 3.69018545  | 0.22782648  |
| 1 | 0.55683671  | 4.62823138  | 0.66165527  |
| 1 | -1.84824856 | 4.63541904  | 0.08319098  |
| 6 | -2.04448819 | 2.47693204  | 0.06493518  |
| 1 | -1.86811101 | -4.62800228 | 0.03892462  |
| 6 | -3.43548141 | -2.43075588 | -0.29893970 |
| 6 | -3.43486839 | 0.00868850  | -0.27417806 |
| 6 | -3.42501439 | 2.44824333  | -0.27560938 |
| 6 | -4.09441030 | 1.25812462  | -0.43786646 |
| 1 | -3.94970279 | 3.39552568  | -0.41151960 |
| 1 | -3.96422501 | -3.37443564 | -0.44389271 |
| 6 | -4.09976440 | -1.23627921 | -0.44979805 |
| 1 | -5.15873142 | -1.22927314 | -0.71479491 |
| 1 | -5.15339328 | 1.25819830  | -0.70289215 |

#### Ila-Cr

|   |             |            |            |
|---|-------------|------------|------------|
| 6 | -4.16025915 | 5.10640055 | 0.42872727 |
| 6 | -4.16957239 | 3.66871507 | 0.35809635 |
| 6 | -2.91398324 | 2.98162055 | 0.31484876 |
| 6 | -1.67006963 | 3.74034916 | 0.34744964 |
| 6 | -1.70978370 | 5.16957321 | 0.43124450 |
| 6 | -2.99462293 | 5.81776842 | 0.46497559 |
| 6 | -0.42519075 | 3.11228821 | 0.30926688 |
| 6 | 0.78547154  | 3.80274750 | 0.36286358 |
| 6 | 0.75101952  | 5.23132580 | 0.45765707 |
| 6 | -0.49675850 | 5.87746922 | 0.48288468 |
| 6 | 2.06670800  | 3.10915906 | 0.34065526 |
| 6 | 3.28360769  | 3.85787880 | 0.43840019 |



|   |             |             |             |
|---|-------------|-------------|-------------|
| 6 | 3.20058229  | 5.29217812  | 0.52680432  |
| 6 | 1.99976914  | 5.94291228  | 0.53144546  |
| 6 | 2.14934329  | 1.71929267  | 0.23757065  |
| 6 | 3.35818459  | 1.02599204  | 0.24207552  |
| 6 | 4.57685496  | 1.76491843  | 0.37391356  |
| 6 | 4.50697338  | 3.16523878  | 0.45551517  |
| 6 | 3.39964312  | -0.42783830 | 0.17180762  |
| 6 | 4.65388848  | -1.11158301 | 0.27396171  |
| 6 | 5.85776776  | -0.32481814 | 0.38451991  |
| 6 | 5.81696782  | 1.03826772  | 0.43368263  |
| 6 | 2.21692890  | -1.20511670 | -0.00279846 |
| 6 | 2.19960763  | -2.61489643 | 0.08400870  |
| 6 | 3.46082033  | -3.31220497 | 0.18542080  |
| 6 | 4.66055038  | -2.54695721 | 0.21587792  |
| 6 | 0.94875083  | -3.37432751 | 0.07853992  |
| 6 | 0.98858537  | -4.80233091 | 0.11942661  |
| 6 | 2.27524073  | -5.45680455 | 0.17476495  |
| 6 | 3.44337651  | -4.75866178 | 0.20677816  |
| 6 | -0.28557868 | -2.73607624 | 0.08701412  |
| 6 | -1.50257049 | -3.42555821 | 0.10531949  |
| 6 | -1.47246862 | -4.85470819 | 0.11215434  |
| 6 | -0.22361238 | -5.50662536 | 0.12443262  |
| 6 | -2.77886565 | -2.72662118 | 0.12955413  |
| 6 | -4.00044371 | -3.47463544 | 0.14213476  |
| 6 | -3.92210444 | -4.91077567 | 0.13119654  |
| 6 | -2.72289800 | -5.56614880 | 0.12025445  |
| 6 | -2.85320676 | -1.33356447 | 0.15219994  |
| 6 | -4.05573596 | -0.62955843 | 0.19256083  |
| 6 | -5.28073451 | -1.37245149 | 0.19726624  |
| 6 | -5.22025666 | -2.77600547 | 0.17037213  |
| 6 | -4.09048814 | 0.82690235  | 0.23864325  |
| 6 | -5.34887141 | 1.50878242  | 0.28142955  |

|    |             |             |             |
|----|-------------|-------------|-------------|
| 6  | -6.55401942 | 0.72124872  | 0.27247586  |
| 6  | -6.52185606 | -0.64384533 | 0.23393110  |
| 6  | -2.92241614 | 1.58839874  | 0.25405389  |
| 6  | -5.35473901 | 2.91319567  | 0.33707663  |
| 1  | -3.02201085 | 6.90792003  | 0.52294772  |
| 1  | -5.11904288 | 5.62847477  | 0.45740539  |
| 1  | -6.31419408 | 3.43595241  | 0.37059235  |
| 1  | -7.51264635 | 1.24359982  | 0.30118275  |
| 1  | -7.45458969 | -1.21180298 | 0.23204548  |
| 1  | -6.15372893 | -3.34475845 | 0.17627376  |
| 1  | -4.85429559 | -5.47958059 | 0.13664330  |
| 1  | -2.69704587 | -6.65776399 | 0.11791938  |
| 1  | -0.19961930 | -6.59907224 | 0.14592303  |
| 1  | 2.29597802  | -6.54809886 | 0.19676764  |
| 1  | 4.39963344  | -5.28200683 | 0.25356403  |
| 1  | 5.61735381  | -3.06889839 | 0.24736376  |
| 1  | 6.81257678  | -0.85028575 | 0.43751316  |
| 1  | 6.74536732  | 1.60537441  | 0.52541478  |
| 1  | 5.43517450  | 3.73547683  | 0.54394834  |
| 1  | 4.13060287  | 5.86062147  | 0.59177421  |
| 1  | 1.97015757  | 7.03248861  | 0.59893908  |
| 1  | -0.52467650 | 6.96809352  | 0.55095104  |
| 1  | -0.39770304 | 2.02950220  | 0.24187872  |
| 1  | -1.96983758 | 1.06948799  | 0.22477420  |
| 1  | -1.92682248 | -0.76853704 | 0.14373329  |
| 1  | -0.30685678 | -1.65091423 | 0.08868188  |
| 1  | 1.27961940  | -0.68725321 | -0.16520360 |
| 1  | 1.22763340  | 1.15173279  | 0.16003973  |
| 24 | 3.56206689  | -1.92131060 | -1.58664985 |
| 6  | 5.11452035  | -1.96307527 | -2.57405977 |
| 6  | 2.91545426  | -3.19495221 | -2.73169317 |
| 6  | 2.90563488  | -0.66238451 | -2.75956204 |

|   |            |             |             |
|---|------------|-------------|-------------|
| 8 | 2.48772806 | 0.13173905  | -3.50107707 |
| 8 | 6.09747012 | -1.99435823 | -3.19828791 |
| 8 | 2.50656231 | -4.00592019 | -3.46219841 |

**IIb-Cr**

|   |             |             |             |
|---|-------------|-------------|-------------|
| 6 | -3.99174895 | 5.14674933  | 0.18372421  |
| 6 | -4.07971163 | 3.71137803  | 0.23619613  |
| 6 | -2.86422926 | 2.95446195  | 0.20670480  |
| 6 | -1.58295544 | 3.64272111  | 0.12709293  |
| 6 | -1.54364641 | 5.07271755  | 0.08799855  |
| 6 | -2.78939873 | 5.79253957  | 0.11523541  |
| 6 | -0.37445390 | 2.94438581  | 0.09447802  |
| 6 | 0.87038052  | 3.56712950  | 0.03777712  |
| 6 | 0.91572483  | 4.99721402  | 0.00669258  |
| 6 | -0.29216634 | 5.71270481  | 0.02808177  |
| 6 | 2.11364514  | 2.80096195  | 0.01988770  |
| 6 | 3.37734183  | 3.49108581  | -0.01472175 |
| 6 | 3.36846086  | 4.93159392  | -0.05012553 |
| 6 | 2.20378066  | 5.64230865  | -0.04232774 |
| 6 | 2.11710958  | 1.41488338  | 0.04009991  |
| 6 | 3.29211465  | 0.64151330  | 0.05872529  |
| 6 | 4.55972169  | 1.32836021  | 0.03344696  |
| 6 | 4.55750853  | 2.74499447  | -0.01707195 |
| 6 | 3.24959308  | -0.82146004 | 0.13463599  |
| 6 | 4.47521094  | -1.57956842 | 0.18459366  |
| 6 | 5.72335910  | -0.86570811 | 0.05870825  |
| 6 | 5.76406570  | 0.53429698  | -0.01353355 |
| 6 | 2.03165244  | -1.52325078 | 0.19300536  |
| 6 | 1.94788772  | -2.90140319 | 0.31644470  |
| 6 | 3.16934746  | -3.66345732 | 0.35738740  |
| 6 | 4.39072770  | -2.99123372 | 0.28113616  |
| 6 | 0.66239817  | -3.58838010 | 0.40980935  |

|   |             |             |            |
|---|-------------|-------------|------------|
| 6 | 0.62477786  | -5.01420311 | 0.52707793 |
| 6 | 1.87315124  | -5.73442269 | 0.54925315 |
| 6 | 3.07699416  | -5.09694235 | 0.47151100 |
| 6 | -0.54404960 | -2.89203769 | 0.39816995 |
| 6 | -1.79089309 | -3.51205638 | 0.49907652 |
| 6 | -1.83460012 | -4.93829156 | 0.60814257 |
| 6 | -0.62247230 | -5.65245188 | 0.61871203 |
| 6 | -3.02990342 | -2.74620530 | 0.50301701 |
| 6 | -4.28710936 | -3.42433661 | 0.60675724 |
| 6 | -4.28260241 | -4.86011971 | 0.70313052 |
| 6 | -3.11988914 | -5.57808177 | 0.70560752 |
| 6 | -3.03235855 | -1.35420930 | 0.41734044 |
| 6 | -4.19541939 | -0.58560246 | 0.43164292 |
| 6 | -5.45579669 | -1.25828778 | 0.53189597 |
| 6 | -5.46794736 | -2.66129830 | 0.61507189 |
| 6 | -4.15313934 | 0.86924194  | 0.35606153 |
| 6 | -5.37212511 | 1.62056407  | 0.38245045 |
| 6 | -6.61572893 | 0.90139351  | 0.47668347 |
| 6 | -6.65536314 | -0.46240780 | 0.54743406 |
| 6 | -2.94755590 | 1.56357733  | 0.26581951 |
| 6 | -5.30272379 | 3.02299232  | 0.32013159 |
| 1 | -2.75709354 | 6.88349742  | 0.08035297 |
| 1 | -4.91949918 | 5.72250137  | 0.20326257 |
| 1 | -6.23163798 | 3.59881345  | 0.34176767 |
| 1 | -7.54455615 | 1.47549850  | 0.49306291 |
| 1 | -7.61583254 | -0.97698248 | 0.62019039 |
| 1 | -6.42861720 | -3.17703638 | 0.69283428 |
| 1 | -5.24210589 | -5.37607968 | 0.77884019 |
| 1 | -3.15095067 | -6.66684348 | 0.78359168 |
| 1 | -0.65276577 | -6.74172576 | 0.70445345 |
| 1 | 1.83823023  | -6.82265199 | 0.63335963 |
| 1 | 4.00401143  | -5.67320390 | 0.49240385 |

|    |             |             |             |
|----|-------------|-------------|-------------|
| 1  | 5.31850750  | -3.56715115 | 0.30803833  |
| 1  | 6.65238466  | -1.43421871 | 0.03353269  |
| 1  | 6.72436199  | 1.04241923  | -0.09455556 |
| 1  | 5.51723708  | 3.26565286  | -0.04752358 |
| 1  | 4.32731831  | 5.45229396  | -0.08663153 |
| 1  | 2.23218799  | 6.73358062  | -0.07167043 |
| 1  | -0.25905044 | 6.80492001  | 0.00056709  |
| 1  | -0.40810474 | 1.85987629  | 0.11850212  |
| 1  | -2.02551293 | 0.99192562  | 0.24580777  |
| 1  | -2.07884648 | -0.84209815 | 0.34051819  |
| 1  | -0.51468309 | -1.81072599 | 0.31001206  |
| 1  | 1.11263240  | -0.94829352 | 0.15817334  |
| 1  | 1.16624602  | 0.89359973  | 0.06207238  |
| 24 | 4.58929954  | -0.22309392 | -1.72059033 |
| 6  | 5.38258463  | -1.54281523 | -2.69759159 |
| 6  | 3.17692621  | -0.25095682 | -2.91362305 |
| 6  | 5.44445444  | 0.94741137  | -2.82730702 |
| 8  | 6.00244674  | 1.68277575  | -3.54131873 |
| 8  | 5.90183231  | -2.37510842 | -3.32980440 |
| 8  | 2.30162957  | -0.27013378 | -3.67979635 |

**TS(IIa-b)-Cr**

|   |             |            |            |
|---|-------------|------------|------------|
| 6 | -4.12972837 | 5.14588066 | 0.39974319 |
| 6 | -4.17002479 | 3.70782502 | 0.35138965 |
| 6 | -2.92847023 | 2.99540674 | 0.31598963 |
| 6 | -1.66878616 | 3.72652645 | 0.33711679 |
| 6 | -1.67762212 | 5.15833956 | 0.39045272 |
| 6 | -2.94880651 | 5.83307552 | 0.41817245 |
| 6 | -0.44041519 | 3.06907342 | 0.30921832 |
| 6 | 0.78658590  | 3.73286996 | 0.33537838 |
| 6 | 0.78382178  | 5.16597863 | 0.38594134 |
| 6 | -0.44979358 | 5.84009237 | 0.41215079 |

|   |             |             |             |
|---|-------------|-------------|-------------|
| 6 | 2.04721339  | 3.01008277  | 0.30411358  |
| 6 | 3.27795444  | 3.73648269  | 0.32102099  |
| 6 | 3.23147830  | 5.17179531  | 0.37254236  |
| 6 | 2.04597726  | 5.85178625  | 0.40387180  |
| 6 | 2.09922139  | 1.60775280  | 0.26003694  |
| 6 | 3.29249965  | 0.90080078  | 0.20237013  |
| 6 | 4.52773447  | 1.62196111  | 0.24157097  |
| 6 | 4.49198038  | 3.01903916  | 0.29667362  |
| 6 | 3.32345847  | -0.56012923 | 0.11837944  |
| 6 | 4.56471867  | -1.27799308 | 0.31230879  |
| 6 | 5.78451143  | -0.50210574 | 0.27461281  |
| 6 | 5.75650539  | 0.86807647  | 0.21995335  |
| 6 | 2.17733042  | -1.33413321 | -0.15476192 |
| 6 | 2.09740660  | -2.72336138 | 0.11627786  |
| 6 | 3.32295377  | -3.43144339 | 0.30192852  |
| 6 | 4.54377547  | -2.69584709 | 0.26620653  |
| 6 | 0.83990241  | -3.43215036 | 0.16154406  |
| 6 | 0.83916255  | -4.86058513 | 0.31608976  |
| 6 | 2.09549455  | -5.53573254 | 0.44318650  |
| 6 | 3.28390053  | -4.85221637 | 0.45119281  |
| 6 | -0.39156597 | -2.76810627 | 0.11275636  |
| 6 | -1.61781403 | -3.42767877 | 0.19198883  |
| 6 | -1.61961746 | -4.85984278 | 0.29089844  |
| 6 | -0.39183795 | -5.53608102 | 0.35571650  |
| 6 | -2.88639468 | -2.70725070 | 0.20400608  |
| 6 | -4.12029166 | -3.43375173 | 0.26114107  |
| 6 | -4.06922397 | -4.87057350 | 0.31497354  |
| 6 | -2.88269003 | -5.54616656 | 0.33899961  |
| 6 | -2.93983044 | -1.31486817 | 0.19102741  |
| 6 | -4.13238342 | -0.59116172 | 0.23531877  |
| 6 | -5.36845027 | -1.31243194 | 0.26928903  |
| 6 | -5.32867273 | -2.71727472 | 0.27996203  |

|    |             |             |             |
|----|-------------|-------------|-------------|
| 6  | -4.14431509 | 0.86426528  | 0.26410359  |
| 6  | -5.38992004 | 1.56952840  | 0.30542437  |
| 6  | -6.60756162 | 0.80267799  | 0.31597846  |
| 6  | -6.59716847 | -0.56371774 | 0.30230227  |
| 6  | -2.96280778 | 1.60351386  | 0.26974435  |
| 6  | -5.36944039 | 2.97487958  | 0.34336201  |
| 1  | -2.95346652 | 6.92443295  | 0.45583861  |
| 1  | -5.07683303 | 5.68906445  | 0.42330440  |
| 1  | -6.31885519 | 3.51582442  | 0.37343097  |
| 1  | -7.55755053 | 1.34063758  | 0.34242555  |
| 1  | -7.53871221 | -1.11663836 | 0.31903695  |
| 1  | -6.26977241 | -3.27214660 | 0.31577301  |
| 1  | -5.01199200 | -5.42038850 | 0.35123426  |
| 1  | -2.87509350 | -6.63650287 | 0.39729979  |
| 1  | -0.39260609 | -6.62444126 | 0.45588148  |
| 1  | 2.09206978  | -6.62235220 | 0.54993211  |
| 1  | 4.22642607  | -5.39107302 | 0.56190161  |
| 1  | 5.48988507  | -3.23487691 | 0.33470160  |
| 1  | 6.73633111  | -1.03394890 | 0.29576366  |
| 1  | 6.69808723  | 1.42000179  | 0.18775518  |
| 1  | 5.43329701  | 3.57364298  | 0.32258293  |
| 1  | 4.17611643  | 5.71926174  | 0.38519303  |
| 1  | 2.04273595  | 6.94306524  | 0.44142134  |
| 1  | -0.45242971 | 6.93251767  | 0.44942664  |
| 1  | -0.43608915 | 1.98504515  | 0.26204952  |
| 1  | -2.02064170 | 1.06631190  | 0.24556679  |
| 1  | -2.00423729 | -0.76565650 | 0.16017354  |
| 1  | -0.38679342 | -1.68440786 | 0.03699206  |
| 1  | 1.27606217  | -0.80952229 | -0.46329987 |
| 1  | 1.17009912  | 1.04477434  | 0.28455076  |
| 24 | 4.24275826  | -1.37922146 | -1.81989289 |
| 6  | 5.70325626  | -1.80798309 | -2.81693896 |

|   |            |             |             |
|---|------------|-------------|-------------|
| 6 | 3.30688216 | -2.59224159 | -2.78926390 |
| 6 | 3.82026508 | -0.11598724 | -3.05676088 |
| 8 | 3.55007658 | 0.69878713  | -3.85034726 |
| 8 | 6.63137155 | -2.08517571 | -3.47208376 |
| 8 | 2.71939865 | -3.38391058 | -3.41531314 |

**TS'(IIa-b)-Cr**

|   |             |             |             |
|---|-------------|-------------|-------------|
| 6 | 1.00851196  | -3.44958535 | -0.35929304 |
| 6 | 2.23027456  | -2.81996106 | 0.13041048  |
| 6 | 3.49211170  | -3.48843199 | -0.05581793 |
| 6 | 3.47752429  | -4.84389829 | -0.53817469 |
| 6 | 2.31528147  | -5.47614346 | -0.88615902 |
| 6 | 1.04911560  | -4.80210080 | -0.84798379 |
| 6 | -0.21336019 | -2.76027274 | -0.37185368 |
| 6 | -0.14704304 | -5.38722508 | -1.28659688 |
| 1 | -0.12822149 | -6.42005281 | -1.64315765 |
| 6 | -1.36722671 | -4.68610856 | -1.30418251 |
| 6 | -1.39412828 | -3.32394140 | -0.85982891 |
| 1 | -0.24027820 | -1.74671074 | 0.01356851  |
| 6 | -2.63535139 | -2.56560731 | -0.92507430 |
| 6 | -2.59527757 | -5.28408949 | -1.75230484 |
| 6 | -3.77010505 | -4.58566656 | -1.76717655 |
| 1 | -2.57342034 | -6.32439129 | -2.08290600 |
| 6 | -3.83884036 | -3.20729071 | -1.36332215 |
| 6 | -2.68802498 | -1.21342567 | -0.58941838 |
| 6 | -5.02951145 | -2.46181928 | -1.39730975 |
| 1 | -5.94986297 | -2.95200577 | -1.72514490 |
| 6 | -5.07566124 | -1.10634679 | -1.02899713 |
| 6 | -3.86251313 | -0.46098840 | -0.62444890 |
| 1 | -1.76669303 | -0.71769449 | -0.30117843 |
| 6 | -6.28956782 | -0.33321136 | -1.04502140 |
| 6 | -3.88122185 | 0.94693958  | -0.25169109 |



|   |             |             |             |
|---|-------------|-------------|-------------|
| 6 | -6.30896975 | 0.98287844  | -0.67852193 |
| 1 | -7.21246956 | -0.82669503 | -1.35687565 |
| 6 | -5.11560258 | 1.67294878  | -0.26502909 |
| 6 | -2.72119916 | 1.61624338  | 0.13502042  |
| 6 | -5.10971551 | 3.02359434  | 0.12426969  |
| 1 | -6.05057094 | 3.58005113  | 0.11386128  |
| 6 | -3.93621448 | 3.68118118  | 0.53256301  |
| 6 | -2.70453264 | 2.95087182  | 0.53717021  |
| 1 | -1.78311596 | 1.07181283  | 0.11984156  |
| 6 | -3.91440408 | 5.05846569  | 0.94983196  |
| 6 | -1.47625498 | 3.60101983  | 0.97340670  |
| 6 | -2.76162458 | 5.66982228  | 1.35581918  |
| 1 | -4.85288091 | 5.61686373  | 0.93877065  |
| 6 | -1.50399841 | 4.97076548  | 1.39082955  |
| 6 | -0.26158846 | 2.91769074  | 1.01257110  |
| 1 | -2.78018104 | 6.71611153  | 1.66819426  |
| 6 | -0.30628270 | 5.57191445  | 1.81491981  |
| 1 | -0.32191393 | 6.62018248  | 2.12444783  |
| 6 | 0.91083691  | 4.87010275  | 1.85600015  |
| 6 | 0.92841808  | 3.49602224  | 1.45171076  |
| 1 | -0.23882749 | 1.88676487  | 0.67585867  |
| 6 | 2.14657521  | 5.47257700  | 2.27973538  |
| 6 | 2.17142040  | 2.73997981  | 1.50594863  |
| 6 | 3.31972944  | 4.77191713  | 2.30201935  |
| 1 | 2.13295570  | 6.52195212  | 2.58199646  |
| 6 | 3.38087139  | 3.38666160  | 1.91857163  |
| 6 | 2.22649265  | 1.38835418  | 1.15990897  |
| 6 | 4.57877883  | 2.64938342  | 1.91804301  |
| 1 | 4.24270283  | 5.26207489  | 2.61856485  |
| 6 | 3.40380660  | 0.64283417  | 1.18344546  |
| 1 | 1.31808145  | 0.90102068  | 0.82008697  |
| 1 | 5.50677775  | 3.15013600  | 2.20552737  |

|    |             |             |             |
|----|-------------|-------------|-------------|
| 6  | 4.62557217  | 1.29661595  | 1.54553091  |
| 6  | 3.41780297  | -0.76367086 | 0.80980732  |
| 6  | 5.84987973  | 0.54393932  | 1.48779042  |
| 6  | 4.67430595  | -1.46542328 | 0.72845108  |
| 6  | 2.21810355  | -1.48164559 | 0.60721824  |
| 6  | 5.87418107  | -0.76127141 | 1.08215667  |
| 1  | 6.78018154  | 1.04799849  | 1.75695518  |
| 6  | 4.67773352  | -2.80095098 | 0.29916841  |
| 1  | 1.27874381  | -1.03221575 | 0.91259081  |
| 1  | 4.43183999  | -5.36676434 | -0.62444076 |
| 1  | 2.34310162  | -6.50604751 | -1.24653136 |
| 1  | 5.63103540  | -3.32887867 | 0.22097176  |
| 1  | 6.82252485  | -1.29850074 | 1.02198126  |
| 1  | -4.68771734 | -5.07085589 | -2.10662311 |
| 1  | -7.24821388 | 1.53984045  | -0.69616345 |
| 24 | 2.40437704  | -1.61169462 | -1.67623195 |
| 6  | 1.90999896  | -2.23946964 | -3.30898390 |
| 6  | 3.76595837  | -0.69319988 | -2.45340798 |
| 6  | 1.34273538  | -0.18972050 | -1.98318259 |
| 8  | 4.63539134  | -0.09663290 | -2.95632419 |
| 8  | 0.65316563  | 0.74036808  | -2.16979463 |
| 8  | 1.56568773  | -2.62729386 | -4.35638338 |

**TS''(IIa-b)-Cr**

|   |             |             |             |
|---|-------------|-------------|-------------|
| 6 | 1.01419556  | -3.36558579 | -0.30516499 |
| 6 | 2.25468723  | -2.71147563 | 0.11514136  |
| 6 | 3.51494381  | -3.39516127 | -0.02763735 |
| 6 | 3.49885102  | -4.72499610 | -0.59226906 |
| 6 | 2.33932167  | -5.33712932 | -0.98297857 |
| 6 | 1.05081327  | -4.69515278 | -0.85956773 |
| 6 | -0.20047511 | -2.66386637 | -0.36603922 |
| 6 | -0.15167024 | -5.29194296 | -1.27332972 |

|   |             |             |             |
|---|-------------|-------------|-------------|
| 1 | -0.12408806 | -6.31153654 | -1.66410941 |
| 6 | -1.37986064 | -4.60445243 | -1.24252215 |
| 6 | -1.39663284 | -3.23922999 | -0.81697484 |
| 1 | -0.22913583 | -1.65277719 | 0.02446079  |
| 6 | -2.63415647 | -2.47978817 | -0.85694055 |
| 6 | -2.61815366 | -5.20616063 | -1.65624151 |
| 6 | -3.79168529 | -4.50488875 | -1.65289371 |
| 1 | -2.60500889 | -6.24908865 | -1.97853820 |
| 6 | -3.84921904 | -3.12274367 | -1.26161244 |
| 6 | -2.67789347 | -1.12484592 | -0.52471790 |
| 6 | -5.03799684 | -2.37348349 | -1.27597210 |
| 1 | -5.96631987 | -2.86271069 | -1.58195633 |
| 6 | -5.07292034 | -1.01548961 | -0.91591770 |
| 6 | -3.85073649 | -0.37122517 | -0.53507906 |
| 1 | -1.75015315 | -0.62829232 | -0.25949752 |
| 6 | -6.28382856 | -0.23783496 | -0.91928066 |
| 6 | -3.85971237 | 1.03832486  | -0.16390622 |
| 6 | -6.29227921 | 1.08168615  | -0.56504412 |
| 1 | -7.21312206 | -0.72991900 | -1.21378322 |
| 6 | -5.09091778 | 1.76968558  | -0.17130104 |
| 6 | -2.69494844 | 1.70382922  | 0.21541395  |
| 6 | -5.07547690 | 3.12309421  | 0.20758238  |
| 1 | -6.01405715 | 3.68342254  | 0.20167804  |
| 6 | -3.89574607 | 3.77923545  | 0.59977730  |
| 6 | -2.66749180 | 3.04307242  | 0.60372920  |
| 1 | -1.76138116 | 1.15101754  | 0.21028832  |
| 6 | -3.86560370 | 5.16055488  | 1.00344097  |
| 6 | -1.43295109 | 3.69381790  | 1.02201462  |
| 6 | -2.70772693 | 5.77098383  | 1.39523191  |
| 1 | -4.80207579 | 5.72228795  | 0.99384113  |
| 6 | -1.45246919 | 5.06726607  | 1.42679931  |
| 6 | -0.21839797 | 3.00911336  | 1.05533842  |

|   |             |             |             |
|---|-------------|-------------|-------------|
| 1 | -2.71979234 | 6.82006579  | 1.69837848  |
| 6 | -0.25024730 | 5.66687124  | 1.84060818  |
| 1 | -0.26201157 | 6.71592861  | 2.14765145  |
| 6 | 0.96535381  | 4.96234053  | 1.87891908  |
| 6 | 0.97805011  | 3.58836620  | 1.47538127  |
| 1 | -0.20475028 | 1.97120884  | 0.73953163  |
| 6 | 2.20211001  | 5.55981123  | 2.30914047  |
| 6 | 2.22165193  | 2.82957421  | 1.52289286  |
| 6 | 3.36977694  | 4.85140862  | 2.34699587  |
| 1 | 2.19131501  | 6.60936349  | 2.61079007  |
| 6 | 3.42829572  | 3.46602443  | 1.96184983  |
| 6 | 2.27505173  | 1.48548059  | 1.15648376  |
| 6 | 4.61651111  | 2.71610434  | 1.99105470  |
| 1 | 4.29127899  | 5.33521520  | 2.67749691  |
| 6 | 3.44360129  | 0.72377457  | 1.20367350  |
| 1 | 1.36492837  | 1.01284420  | 0.80166650  |
| 1 | 5.54117054  | 3.20398487  | 2.31001188  |
| 6 | 4.65789218  | 1.36189920  | 1.61801570  |
| 6 | 3.45921103  | -0.67986598 | 0.82983902  |
| 6 | 5.87002995  | 0.58884551  | 1.61443490  |
| 6 | 4.69330512  | -1.40263296 | 0.81150010  |
| 6 | 2.28239091  | -1.35595904 | 0.48019467  |
| 6 | 5.89073009  | -0.71988203 | 1.21985552  |
| 1 | 6.79589101  | 1.07835267  | 1.92383935  |
| 6 | 4.69300076  | -2.73698403 | 0.36317649  |
| 1 | 1.33907872  | -0.82806190 | 0.56510944  |
| 1 | 4.45403378  | -5.23426123 | -0.73130753 |
| 1 | 2.37562049  | -6.33138368 | -1.43153233 |
| 1 | 5.64305983  | -3.26985701 | 0.28270991  |
| 1 | 6.83179163  | -1.27308205 | 1.20869844  |
| 1 | -4.71705547 | -4.99166713 | -1.96800596 |
| 1 | -7.22907293 | 1.64291155  | -0.57567864 |

|    |            |             |             |
|----|------------|-------------|-------------|
| 24 | 2.03419914 | -2.50127041 | -2.12625993 |
| 6  | 1.35413610 | -3.07649101 | -3.70866482 |
| 6  | 3.53560512 | -1.94783738 | -2.98527902 |
| 6  | 1.31615406 | -0.88708820 | -2.48109071 |
| 8  | 4.49804366 | -1.57748603 | -3.53602606 |
| 8  | 0.85560152 | 0.16132405  | -2.73068219 |
| 8  | 0.90553904 | -3.43550438 | -4.72683518 |

**IM(IIa-b)-Cr**

|   |             |             |             |
|---|-------------|-------------|-------------|
| 6 | 1.12062274  | -3.37259258 | -0.45689972 |
| 6 | 2.34123320  | -2.71253198 | -0.03340359 |
| 6 | 3.58972481  | -3.43282274 | -0.02614239 |
| 6 | 3.56349525  | -4.81747166 | -0.41820946 |
| 6 | 2.41318701  | -5.43952079 | -0.81754219 |
| 6 | 1.14970286  | -4.75237783 | -0.87300213 |
| 6 | -0.09873339 | -2.65950302 | -0.54998070 |
| 6 | -0.04429561 | -5.34815235 | -1.28191503 |
| 1 | -0.03189104 | -6.40009592 | -1.57805720 |
| 6 | -1.27879784 | -4.64833434 | -1.32512087 |
| 6 | -1.31124332 | -3.27721180 | -0.95405097 |
| 1 | -0.18989541 | -1.70118343 | -0.03313835 |
| 6 | -2.55777323 | -2.54696476 | -0.96924267 |
| 6 | -2.50984333 | -5.27829561 | -1.71503664 |
| 6 | -3.69719013 | -4.59725719 | -1.71695160 |
| 1 | -2.48321631 | -6.32979499 | -2.00777178 |
| 6 | -3.77145281 | -3.21392974 | -1.34225630 |
| 6 | -2.61878630 | -1.19041471 | -0.63528273 |
| 6 | -4.97212214 | -2.48110741 | -1.33518605 |
| 1 | -5.89851828 | -2.98447327 | -1.62352226 |
| 6 | -5.02197378 | -1.12533855 | -0.97140318 |
| 6 | -3.80359761 | -0.46131885 | -0.60682503 |
| 1 | -1.69373503 | -0.67441209 | -0.39921232 |

|   |             |             |             |
|---|-------------|-------------|-------------|
| 6 | -6.24374855 | -0.36488907 | -0.95533092 |
| 6 | -3.83088486 | 0.94323539  | -0.21401614 |
| 6 | -6.26673937 | 0.95327812  | -0.59643902 |
| 1 | -7.16957963 | -0.86864934 | -1.24079414 |
| 6 | -5.07225866 | 1.65655413  | -0.20743169 |
| 6 | -2.67603822 | 1.61807983  | 0.17824678  |
| 6 | -5.07402354 | 3.00594266  | 0.18550231  |
| 1 | -6.02037839 | 3.55304509  | 0.18936695  |
| 6 | -3.90234078 | 3.67453285  | 0.58165782  |
| 6 | -2.66476086 | 2.95425876  | 0.58014294  |
| 1 | -1.73712391 | 1.07393350  | 0.17930883  |
| 6 | -3.89074725 | 5.05217175  | 0.99849721  |
| 6 | -1.43906118 | 3.61725737  | 1.00508349  |
| 6 | -2.74128932 | 5.67390738  | 1.39713232  |
| 1 | -4.83458915 | 5.60148148  | 0.99378314  |
| 6 | -1.47698482 | 4.98640306  | 1.42270244  |
| 6 | -0.21390948 | 2.94992963  | 1.03158573  |
| 1 | -2.76731949 | 6.71965511  | 1.71071470  |
| 6 | -0.28360642 | 5.59706869  | 1.84664932  |
| 1 | -0.31112597 | 6.64114480  | 2.16925004  |
| 6 | 0.94179875  | 4.90956829  | 1.87790594  |
| 6 | 0.97533513  | 3.54298485  | 1.45223124  |
| 1 | -0.18796099 | 1.91204536  | 0.71570270  |
| 6 | 2.16768014  | 5.51543879  | 2.32828755  |
| 6 | 2.23230310  | 2.80357203  | 1.48577822  |
| 6 | 3.34360494  | 4.82087390  | 2.36928467  |
| 1 | 2.14034806  | 6.55949374  | 2.64744133  |
| 6 | 3.42600253  | 3.44416137  | 1.95800790  |
| 6 | 2.31213625  | 1.47681474  | 1.07404943  |
| 6 | 4.62185526  | 2.70815167  | 1.99213721  |
| 1 | 4.25420523  | 5.31039022  | 2.72086137  |
| 6 | 3.48933280  | 0.72393091  | 1.12747748  |

|    |             |             |             |
|----|-------------|-------------|-------------|
| 1  | 1.41662234  | 1.00818124  | 0.67890028  |
| 1  | 5.53374547  | 3.19899379  | 2.34178557  |
| 6  | 4.68739754  | 1.36133786  | 1.59152501  |
| 6  | 3.52298463  | -0.66245689 | 0.72228612  |
| 6  | 5.89946712  | 0.59324043  | 1.61249427  |
| 6  | 4.74125515  | -1.39245947 | 0.76378649  |
| 6  | 2.34816007  | -1.33610506 | 0.29708984  |
| 6  | 5.92650208  | -0.71552343 | 1.21249247  |
| 1  | 6.81605460  | 1.07794107  | 1.95478417  |
| 6  | 4.74281716  | -2.75913747 | 0.37941167  |
| 1  | 1.39827306  | -0.84111636 | 0.51331494  |
| 1  | 4.50341050  | -5.37258196 | -0.40506572 |
| 1  | 2.44114584  | -6.48779894 | -1.12101087 |
| 1  | 5.68844528  | -3.30636396 | 0.40725779  |
| 1  | 6.86412735  | -1.27438928 | 1.23651800  |
| 1  | -4.61717859 | -5.10587952 | -2.01216863 |
| 1  | -7.21147370 | 1.50112194  | -0.59545903 |
| 24 | 1.48319389  | -1.58634751 | -1.80197233 |
| 6  | 0.24384507  | -1.26391222 | -3.11339496 |
| 6  | 2.40633453  | -2.50969936 | -3.04443778 |
| 6  | 2.40133252  | -0.10571131 | -2.37177470 |
| 8  | 3.00225752  | -3.09500892 | -3.86293187 |
| 8  | 2.99502986  | 0.82184302  | -2.75389103 |
| 8  | -0.52878096 | -1.06882914 | -3.96416367 |

### Ila-Mo

|   |             |            |            |
|---|-------------|------------|------------|
| 6 | -4.16634827 | 5.10323148 | 0.48605601 |
| 6 | -4.17452407 | 3.66655330 | 0.40224331 |
| 6 | -2.91868144 | 2.98103922 | 0.34754670 |
| 6 | -1.67554034 | 3.74040317 | 0.38292795 |
| 6 | -1.71639182 | 5.16812886 | 0.48406154 |
| 6 | -3.00133230 | 5.81497573 | 0.52699764 |

|   |             |             |             |
|---|-------------|-------------|-------------|
| 6 | -0.43018143 | 3.11396863  | 0.33429545  |
| 6 | 0.77938503  | 3.80483662  | 0.39642851  |
| 6 | 0.74358855  | 5.23138016  | 0.51406669  |
| 6 | -0.50417802 | 5.87629114  | 0.54599065  |
| 6 | 2.06162259  | 3.11275523  | 0.36717432  |
| 6 | 3.27719970  | 3.86072599  | 0.49259656  |
| 6 | 3.19219471  | 5.29322676  | 0.60375313  |
| 6 | 1.99117199  | 5.94271441  | 0.60716635  |
| 6 | 2.14669675  | 1.72676891  | 0.23315537  |
| 6 | 3.35625823  | 1.03293267  | 0.24488057  |
| 6 | 4.57268508  | 1.77043200  | 0.40952705  |
| 6 | 4.50005118  | 3.16967181  | 0.51276523  |
| 6 | 3.40053715  | -0.41788863 | 0.15010385  |
| 6 | 4.65523672  | -1.10123440 | 0.26087215  |
| 6 | 5.85480966  | -0.31710136 | 0.40381576  |
| 6 | 5.81149076  | 1.04605853  | 0.47626183  |
| 6 | 2.21531638  | -1.19733004 | -0.03083063 |
| 6 | 2.19811770  | -2.60830682 | 0.05270019  |
| 6 | 3.46305548  | -3.30743546 | 0.16216498  |
| 6 | 4.66308309  | -2.54056182 | 0.19781510  |
| 6 | 0.94764710  | -3.36919923 | 0.06560250  |
| 6 | 0.98933473  | -4.79639080 | 0.13164650  |
| 6 | 2.27535309  | -5.45021793 | 0.19136929  |
| 6 | 3.44447966  | -4.75250588 | 0.20521100  |
| 6 | -0.28742679 | -2.73264361 | 0.06694206  |
| 6 | -1.50301136 | -3.42271169 | 0.10861959  |
| 6 | -1.47132936 | -4.85149298 | 0.13599958  |
| 6 | -0.22206802 | -5.50160154 | 0.15167249  |
| 6 | -2.77958141 | -2.72497468 | 0.13929990  |
| 6 | -3.99999024 | -3.47411562 | 0.16717614  |
| 6 | -3.92021637 | -4.90998494 | 0.16858881  |
| 6 | -2.72050680 | -5.56410517 | 0.15941165  |



|   |             |             |            |
|---|-------------|-------------|------------|
| 6 | -2.85494786 | -1.33223435 | 0.16033827 |
| 6 | -4.05766880 | -0.62969086 | 0.21153197 |
| 6 | -5.28167269 | -1.37364665 | 0.22566603 |
| 6 | -5.22015133 | -2.77696146 | 0.20179844 |
| 6 | -4.09339581 | 0.82634076  | 0.26308995 |
| 6 | -5.35197449 | 1.50667313  | 0.31720488 |
| 6 | -6.55628769 | 0.71824641  | 0.31277608 |
| 6 | -6.52309913 | -0.64651739 | 0.27137530 |
| 6 | -2.92602771 | 1.58850344  | 0.27642641 |
| 6 | -5.35903647 | 2.91040994  | 0.38138113 |
| 1 | -3.02923835 | 6.90423222  | 0.59660890 |
| 1 | -5.12534245 | 5.62401100  | 0.52238917 |
| 1 | -6.31863315 | 3.43193692  | 0.42375270 |
| 1 | -7.51495671 | 1.23964301  | 0.34884830 |
| 1 | -7.45503087 | -1.21539972 | 0.27475633 |
| 1 | -6.15279116 | -3.34658574 | 0.21785049 |
| 1 | -4.85161370 | -5.47951936 | 0.18501839 |
| 1 | -2.69330666 | -6.65543461 | 0.16983109 |
| 1 | -0.19662513 | -6.59341760 | 0.18911681 |
| 1 | 2.29590396  | -6.54085862 | 0.22892832 |
| 1 | 4.40071055  | -5.27533088 | 0.25385700 |
| 1 | 5.61898225  | -3.06167795 | 0.25860818 |
| 1 | 6.80900319  | -0.84264751 | 0.46287159 |
| 1 | 6.73749267  | 1.61232760  | 0.59119638 |
| 1 | 5.42643170  | 3.73881458  | 0.62260606 |
| 1 | 4.12099670  | 5.86090030  | 0.68689244 |
| 1 | 1.95986336  | 7.03087334  | 0.69145910 |
| 1 | -0.53300583 | 6.96560737  | 0.63020325 |
| 1 | -0.40170334 | 2.03209606  | 0.25522605 |
| 1 | -1.97327687 | 1.07069641  | 0.23973391 |
| 1 | -1.92933534 | -0.76635495 | 0.14566516 |
| 1 | -0.31076494 | -1.64793315 | 0.04227774 |

|    |            |             |             |
|----|------------|-------------|-------------|
| 1  | 1.27505044 | -0.67796253 | -0.16873368 |
| 1  | 1.22683889 | 1.16176630  | 0.12338528  |
| 42 | 3.58377035 | -1.93211677 | -1.80321770 |
| 6  | 2.90542159 | -0.59854786 | -3.08338309 |
| 8  | 2.49466448 | 0.20613094  | -3.81795373 |
| 6  | 2.89000018 | -3.27788221 | -3.03521321 |
| 8  | 2.47216833 | -4.09627985 | -3.75371950 |
| 6  | 5.22843068 | -2.01331381 | -2.88023509 |
| 8  | 6.21614985 | -2.06518792 | -3.49629087 |

### **Ilb-Mo**

|   |             |             |            |
|---|-------------|-------------|------------|
| 6 | -4.21330273 | 4.96861569  | 0.34163952 |
| 6 | -4.24368218 | 3.53016487  | 0.31667526 |
| 6 | -2.99819604 | 2.82443171  | 0.28378287 |
| 6 | -1.74432398 | 3.56590086  | 0.27762380 |
| 6 | -1.76285663 | 4.99655021  | 0.31614884 |
| 6 | -3.03739102 | 5.66399040  | 0.34363439 |
| 6 | -0.50841226 | 2.91877147  | 0.24383734 |
| 6 | 0.71106993  | 3.59287168  | 0.25808466 |
| 6 | 0.69817406  | 5.02325964  | 0.30849877 |
| 6 | -0.53859760 | 5.68799138  | 0.33050343 |
| 6 | 1.98381137  | 2.88006572  | 0.23813932 |
| 6 | 3.21590512  | 3.61816841  | 0.29027036 |
| 6 | 3.15080832  | 5.05589636  | 0.33484946 |
| 6 | 1.95832349  | 5.71978358  | 0.33997549 |
| 6 | 2.04422796  | 1.49374630  | 0.17294910 |
| 6 | 3.24623514  | 0.76891262  | 0.19461078 |
| 6 | 4.48551904  | 1.50560552  | 0.25754701 |
| 6 | 4.42748170  | 2.91850937  | 0.28711390 |
| 6 | 3.26139595  | -0.70127643 | 0.19631440 |
| 6 | 4.51558879  | -1.41214007 | 0.26075312 |
| 6 | 5.74146149  | -0.64158534 | 0.22496200 |

|   |             |             |            |
|---|-------------|-------------|------------|
| 6 | 5.72701073  | 0.76040765  | 0.22351838 |
| 6 | 2.07456825  | -1.45076914 | 0.17650203 |
| 6 | 2.04273063  | -2.83788612 | 0.24477105 |
| 6 | 3.28978485  | -3.55032484 | 0.29838723 |
| 6 | 4.48668270  | -2.82586883 | 0.29353864 |
| 6 | 0.78494226  | -3.57673644 | 0.26647193 |
| 6 | 0.80152520  | -5.00696977 | 0.32006982 |
| 6 | 2.07578089  | -5.67727865 | 0.35293947 |
| 6 | 3.25433008  | -4.98898298 | 0.34618308 |
| 6 | -0.44817064 | -2.92794451 | 0.25081395 |
| 6 | -1.67048316 | -3.60032750 | 0.28615386 |
| 6 | -1.65952705 | -5.03096184 | 0.32799680 |
| 6 | -0.42127670 | -5.69699435 | 0.34380897 |
| 6 | -2.93936784 | -2.88484923 | 0.29061991 |
| 6 | -4.17004727 | -3.61601904 | 0.32524100 |
| 6 | -4.11003062 | -5.05347518 | 0.35359877 |
| 6 | -2.92003770 | -5.72446248 | 0.35714227 |
| 6 | -2.99594003 | -1.49182422 | 0.27293611 |
| 6 | -4.18927364 | -0.77139745 | 0.29135778 |
| 6 | -5.42318441 | -1.49714657 | 0.32189107 |
| 6 | -5.38056445 | -2.90179331 | 0.33621544 |
| 6 | -4.20428745 | 0.68568388  | 0.28960332 |
| 6 | -5.45289131 | 1.38591991  | 0.31841061 |
| 6 | -6.66808011 | 0.61478909  | 0.34033353 |
| 6 | -6.65400654 | -0.75117021 | 0.34198695 |
| 6 | -3.02604747 | 1.43049807  | 0.26944369 |
| 6 | -5.43922632 | 2.79117640  | 0.32936313 |
| 1 | -3.04881624 | 6.75547778  | 0.36731975 |
| 1 | -5.16399328 | 5.50518180  | 0.36331093 |
| 1 | -6.39096197 | 3.32804273  | 0.35317028 |
| 1 | -7.61943588 | 1.15030435  | 0.35825738 |
| 1 | -7.59412745 | -1.30612734 | 0.36123068 |

|    |             |             |             |
|----|-------------|-------------|-------------|
| 1  | -6.32103712 | -3.45809649 | 0.36134150  |
| 1  | -5.04946367 | -5.60946323 | 0.37659073  |
| 1  | -2.90895188 | -6.81589505 | 0.38337333  |
| 1  | -0.41004299 | -6.78923973 | 0.38030393  |
| 1  | 2.08336435  | -6.76853008 | 0.38799017  |
| 1  | 4.20309123  | -5.52793255 | 0.37480652  |
| 1  | 5.43572250  | -3.36540761 | 0.32587272  |
| 1  | 6.69324454  | -1.17144149 | 0.23603677  |
| 1  | 6.66766308  | 1.30980415  | 0.23333926  |
| 1  | 5.36519890  | 3.47756296  | 0.31825853  |
| 1  | 4.08826166  | 5.61434095  | 0.36233814  |
| 1  | 1.94340885  | 6.81103501  | 0.37258617  |
| 1  | -0.54987885 | 6.78031717  | 0.36450240  |
| 1  | -0.49797195 | 1.83415097  | 0.21140883  |
| 1  | -2.08138958 | 0.89741484  | 0.24754835  |
| 1  | -2.06246218 | -0.93945020 | 0.24968842  |
| 1  | -0.46009772 | -1.84341514 | 0.21592390  |
| 1  | 1.13465901  | -0.91216442 | 0.12486484  |
| 1  | 1.11563174  | 0.93576775  | 0.12231996  |
| 42 | 4.68262043  | 0.04632184  | -1.76430247 |
| 6  | 5.66528734  | -1.25910588 | -2.81259804 |
| 6  | 3.29769003  | 0.02937658  | -3.17681999 |
| 6  | 5.63822850  | 1.36863632  | -2.81651535 |
| 8  | 6.23142008  | 2.16174523  | -3.43535402 |
| 8  | 6.27463313  | -2.04181587 | -3.42897995 |
| 8  | 2.48035260  | 0.01907834  | -4.00502629 |

**TS(IIa-b)-Mo**

|   |             |            |            |
|---|-------------|------------|------------|
| 6 | -4.12428539 | 5.14133863 | 0.36278175 |
| 6 | -4.16241246 | 3.70350546 | 0.31400170 |
| 6 | -2.92000386 | 2.99257570 | 0.28791699 |
| 6 | -1.66184443 | 3.72575574 | 0.31773741 |

|   |             |             |             |
|---|-------------|-------------|-------------|
| 6 | -1.67282918 | 5.15696379  | 0.37546310  |
| 6 | -2.94475120 | 5.83011216  | 0.39269673  |
| 6 | -0.43222657 | 3.07037016  | 0.29722437  |
| 6 | 0.79290451  | 3.73562537  | 0.34029324  |
| 6 | 0.78799093  | 5.16768676  | 0.40007235  |
| 6 | -0.44618481 | 5.84024612  | 0.41354791  |
| 6 | 2.05547031  | 3.01448290  | 0.32470638  |
| 6 | 3.28570594  | 3.74173155  | 0.37518960  |
| 6 | 3.23606493  | 5.17683724  | 0.43279041  |
| 6 | 2.04941480  | 5.85458090  | 0.44344871  |
| 6 | 2.10845134  | 1.61502119  | 0.26963983  |
| 6 | 3.30299137  | 0.90626220  | 0.24330804  |
| 6 | 4.53673208  | 1.62718439  | 0.32203184  |
| 6 | 4.49882131  | 3.02501673  | 0.37940820  |
| 6 | 3.33143586  | -0.55428962 | 0.16631314  |
| 6 | 4.57400965  | -1.27188331 | 0.36867549  |
| 6 | 5.79420034  | -0.49375722 | 0.38040110  |
| 6 | 5.76615971  | 0.87555830  | 0.33989294  |
| 6 | 2.18149261  | -1.32914408 | -0.09270461 |
| 6 | 2.10852251  | -2.71837815 | 0.17290114  |
| 6 | 3.33492605  | -3.42462552 | 0.37177978  |
| 6 | 4.55339350  | -2.68904216 | 0.36952841  |
| 6 | 0.85228215  | -3.43144197 | 0.20571743  |
| 6 | 0.85252858  | -4.85896063 | 0.36172017  |
| 6 | 2.10960572  | -5.53192341 | 0.50281295  |
| 6 | 3.29541362  | -4.84706579 | 0.52271070  |
| 6 | -0.37897155 | -2.76979886 | 0.14199625  |
| 6 | -1.60482323 | -3.43051083 | 0.20934270  |
| 6 | -1.60565053 | -4.86177137 | 0.31148715  |
| 6 | -0.37725197 | -5.53614272 | 0.38989584  |
| 6 | -2.87335726 | -2.71065124 | 0.20471860  |
| 6 | -4.10694916 | -3.43767439 | 0.25166822  |

|   |             |             |            |
|---|-------------|-------------|------------|
| 6 | -4.05500296 | -4.87405980 | 0.31051464 |
| 6 | -2.86837549 | -5.54885404 | 0.34831915 |
| 6 | -2.92718911 | -1.31850775 | 0.18482301 |
| 6 | -4.12016250 | -0.59537754 | 0.21335374 |
| 6 | -5.35583927 | -1.31735237 | 0.23904929 |
| 6 | -5.31576354 | -2.72187108 | 0.25572809 |
| 6 | -4.13310085 | 0.86022464  | 0.23477651 |
| 6 | -5.37946467 | 1.56438922  | 0.26407005 |
| 6 | -6.59651630 | 0.79675240  | 0.26727548 |
| 6 | -6.58515550 | -0.56938457 | 0.25828463 |
| 6 | -2.95242628 | 1.60054132  | 0.24546298 |
| 6 | -5.36087597 | 2.96954383  | 0.29847961 |
| 1 | -2.95118112 | 6.92119995  | 0.43207661 |
| 1 | -5.07215275 | 5.68310997  | 0.37858461 |
| 1 | -6.31090024 | 3.50949344  | 0.32052241 |
| 1 | -7.54683946 | 1.33413214  | 0.28391366 |
| 1 | -7.52628401 | -1.12280148 | 0.26873874 |
| 1 | -6.25684580 | -3.27688954 | 0.28442749 |
| 1 | -4.99745156 | -5.42456879 | 0.33861479 |
| 1 | -2.86083125 | -6.63885382 | 0.40926721 |
| 1 | -0.37760199 | -6.62422752 | 0.49131460 |
| 1 | 2.10688925  | -6.61814543 | 0.61155661 |
| 1 | 4.23743549  | -5.38380662 | 0.64593539 |
| 1 | 5.49836130  | -3.22580781 | 0.46756556 |
| 1 | 6.74513435  | -1.02531854 | 0.43105517 |
| 1 | 6.70705714  | 1.42927963  | 0.34841591 |
| 1 | 5.43912629  | 3.57906960  | 0.43311962 |
| 1 | 4.17919517  | 5.72551529  | 0.46784427 |
| 1 | 2.04400658  | 6.94547925  | 0.48639168 |
| 1 | -0.45076769 | 6.93230328  | 0.45626121 |
| 1 | -0.42663113 | 1.98671882  | 0.24565413 |
| 1 | -2.00970064 | 1.06423367  | 0.22983017 |

|    |             |             |             |
|----|-------------|-------------|-------------|
| 1  | -1.99188010 | -0.76879640 | 0.16130437  |
| 1  | -0.37634136 | -1.68674460 | 0.06245258  |
| 1  | 1.27446612  | -0.80584346 | -0.38262908 |
| 1  | 1.17838176  | 1.05415330  | 0.26158317  |
| 42 | 4.21072244  | -1.40095505 | -1.95221585 |
| 6  | 5.67663509  | -1.88276364 | -3.12292980 |
| 6  | 3.11155460  | -2.61085313 | -2.95874993 |
| 6  | 3.77640958  | -0.05761914 | -3.26271587 |
| 8  | 3.51838918  | 0.77304989  | -4.04617417 |
| 8  | 6.56298644  | -2.16900209 | -3.83077187 |
| 8  | 2.44155458  | -3.36457948 | -3.55149655 |

**TS'(IIa-b)-Mo**

|   |             |             |             |
|---|-------------|-------------|-------------|
| 6 | 1.00491218  | -3.47158155 | -0.32895554 |
| 6 | 2.23013129  | -2.83769426 | 0.14875915  |
| 6 | 3.48830536  | -3.52216210 | 0.00045384  |
| 6 | 3.46756690  | -4.88385346 | -0.46131404 |
| 6 | 2.30390413  | -5.51213887 | -0.81353561 |
| 6 | 1.04139641  | -4.83073221 | -0.79650076 |
| 6 | -0.21226572 | -2.77610322 | -0.35777573 |
| 6 | -0.15592671 | -5.41566940 | -1.23386646 |
| 1 | -0.14090051 | -6.45323707 | -1.57616585 |
| 6 | -1.37231580 | -4.70948680 | -1.26520257 |
| 6 | -1.39520791 | -3.34196976 | -0.83790201 |
| 1 | -0.23498170 | -1.75529002 | 0.00859395  |
| 6 | -2.63332837 | -2.58010015 | -0.91210716 |
| 6 | -2.60141391 | -5.30717016 | -1.71131295 |
| 6 | -3.77263746 | -4.60378453 | -1.73809618 |
| 1 | -2.58299466 | -6.35092602 | -2.03039447 |
| 6 | -3.83757258 | -3.22142601 | -1.34758301 |
| 6 | -2.68305788 | -1.22571184 | -0.58512818 |
| 6 | -5.02578540 | -2.47309304 | -1.38992088 |

|   |             |             |             |
|---|-------------|-------------|-------------|
| 1 | -5.94675101 | -2.96303585 | -1.71589071 |
| 6 | -5.06896630 | -1.11532484 | -1.03053866 |
| 6 | -3.85534686 | -0.47063472 | -0.62710349 |
| 1 | -1.76202119 | -0.73055898 | -0.29553924 |
| 6 | -6.28104481 | -0.33991329 | -1.05288219 |
| 6 | -3.87190749 | 0.93877655  | -0.26012680 |
| 6 | -6.29857966 | 0.97733773  | -0.69132037 |
| 1 | -7.20401423 | -0.83276788 | -1.36482692 |
| 6 | -5.10504779 | 1.66638861  | -0.27741702 |
| 6 | -2.71160325 | 1.60743052  | 0.12608699  |
| 6 | -5.09828804 | 3.01766492  | 0.10873337  |
| 1 | -6.03816340 | 3.57539889  | 0.09492276  |
| 6 | -3.92499819 | 3.67388843  | 0.51885942  |
| 6 | -2.69440415 | 2.94222762  | 0.52718952  |
| 1 | -1.77377113 | 1.06289772  | 0.111109461 |
| 6 | -3.90260821 | 5.05148450  | 0.93447863  |
| 6 | -1.46697082 | 3.59106421  | 0.96719429  |
| 6 | -2.75052635 | 5.66166034  | 1.34340455  |
| 1 | -4.84016476 | 5.61098962  | 0.91976562  |
| 6 | -1.49420520 | 4.96088073  | 1.38359441  |
| 6 | -0.25384690 | 2.90594165  | 1.01204871  |
| 1 | -2.76860239 | 6.70816153  | 1.65446434  |
| 6 | -0.29760524 | 5.56076079  | 1.81188501  |
| 1 | -0.31290332 | 6.60926938  | 2.12007495  |
| 6 | 0.91794647  | 4.85705941  | 1.85862872  |
| 6 | 0.93476401  | 3.48279099  | 1.45618745  |
| 1 | -0.23137542 | 1.87529662  | 0.67518165  |
| 6 | 2.15300111  | 5.45802088  | 2.28592456  |
| 6 | 2.17607427  | 2.72481660  | 1.51668685  |
| 6 | 3.32490324  | 4.75596452  | 2.31266268  |
| 1 | 2.13990964  | 6.50761996  | 2.58676238  |
| 6 | 3.38535611  | 3.37015901  | 1.93131248  |



|    |             |             |             |
|----|-------------|-------------|-------------|
| 6  | 2.22926440  | 1.37260955  | 1.17381906  |
| 6  | 4.58183522  | 2.63114233  | 1.93440325  |
| 1  | 4.24746511  | 5.24525061  | 2.63119675  |
| 6  | 3.40486574  | 0.62592225  | 1.20132267  |
| 1  | 1.32090125  | 0.88640047  | 0.83238917  |
| 1  | 5.51013143  | 3.13059537  | 2.22259977  |
| 6  | 4.62642966  | 1.27768055  | 1.56423628  |
| 6  | 3.41786479  | -0.78222327 | 0.82941473  |
| 6  | 5.84888005  | 0.52187467  | 1.50863647  |
| 6  | 4.67200356  | -1.48997762 | 0.75693092  |
| 6  | 2.21758044  | -1.49864172 | 0.62764633  |
| 6  | 5.87214392  | -0.78494137 | 1.10836357  |
| 1  | 6.77982270  | 1.02461534  | 1.77753710  |
| 6  | 4.67371351  | -2.83381090 | 0.35103402  |
| 1  | 1.27701445  | -1.04864560 | 0.92866430  |
| 1  | 4.41805410  | -5.41609183 | -0.52861572 |
| 1  | 2.32857320  | -6.54748227 | -1.15777300 |
| 1  | 5.62549469  | -3.36632727 | 0.29050116  |
| 1  | 6.81972668  | -1.32376630 | 1.05396026  |
| 1  | -4.69093654 | -5.08848866 | -2.07581882 |
| 1  | -7.23648966 | 1.53604831  | -0.71302413 |
| 42 | 2.42756349  | -1.51628353 | -1.79863814 |
| 6  | 1.87284358  | -2.09603713 | -3.55819017 |
| 6  | 3.81334639  | -0.46993609 | -2.63777814 |
| 6  | 1.26750442  | -0.02632496 | -2.07534840 |
| 8  | 4.66206239  | 0.16668215  | -3.12984501 |
| 8  | 0.54744822  | 0.88893548  | -2.22235436 |
| 8  | 1.49882643  | -2.44836427 | -4.60881400 |

**TS''(IIa-b)-Mo**

|   |            |             |             |
|---|------------|-------------|-------------|
| 6 | 1.00985677 | -3.36773321 | -0.29541657 |
| 6 | 2.25344904 | -2.71223823 | 0.12510300  |

|   |             |             |             |
|---|-------------|-------------|-------------|
| 6 | 3.51120087  | -3.40651187 | 0.01019733  |
| 6 | 3.49141793  | -4.74003413 | -0.54734121 |
| 6 | 2.33106333  | -5.35210386 | -0.93838747 |
| 6 | 1.04180069  | -4.70869775 | -0.82277416 |
| 6 | -0.20218807 | -2.66456929 | -0.36249999 |
| 6 | -0.16229200 | -5.30863550 | -1.22423229 |
| 1 | -0.13835907 | -6.33446257 | -1.59837873 |
| 6 | -1.39017097 | -4.61837619 | -1.19952970 |
| 6 | -1.40282157 | -3.24768422 | -0.79523045 |
| 1 | -0.22703599 | -1.64718793 | 0.01098829  |
| 6 | -2.63964770 | -2.48864847 | -0.83577297 |
| 6 | -2.63039920 | -5.22387063 | -1.60037356 |
| 6 | -3.80279740 | -4.52071002 | -1.60377924 |
| 1 | -2.62002801 | -6.27111725 | -1.90786843 |
| 6 | -3.85682010 | -3.13425300 | -1.22902130 |
| 6 | -2.68075471 | -1.13139788 | -0.51288700 |
| 6 | -5.04438812 | -2.38329632 | -1.24659799 |
| 1 | -5.97436457 | -2.87369030 | -1.54505235 |
| 6 | -5.07606560 | -1.02251884 | -0.89793922 |
| 6 | -3.85243878 | -0.37700876 | -0.52422437 |
| 1 | -1.75235517 | -0.63409920 | -0.25237935 |
| 6 | -6.28563947 | -0.24314525 | -0.90491201 |
| 6 | -3.85893870 | 1.03430085  | -0.15995897 |
| 6 | -6.29138203 | 1.07850802  | -0.55952698 |
| 1 | -7.21595691 | -0.73559213 | -1.19487655 |
| 6 | -5.08897857 | 1.76701076  | -0.17061525 |
| 6 | -2.69354237 | 1.69963089  | 0.21702297  |
| 6 | -5.07202988 | 3.12196267  | 0.20160346  |
| 1 | -6.00975474 | 3.68338655  | 0.19294341  |
| 6 | -3.89177383 | 3.77793139  | 0.59155736  |
| 6 | -2.66464752 | 3.04030475  | 0.59984068  |
| 1 | -1.76086344 | 1.14554550  | 0.21566519  |

|   |             |             |            |
|---|-------------|-------------|------------|
| 6 | -3.86065112 | 5.16058037  | 0.98978195 |
| 6 | -1.43008828 | 3.69098500  | 1.01787434 |
| 6 | -2.70299752 | 5.77074457  | 1.38170896 |
| 1 | -4.79626298 | 5.72329593  | 0.97622040 |
| 6 | -1.44902784 | 5.06542533  | 1.41857929 |
| 6 | -0.21638283 | 3.00522391  | 1.05587020 |
| 1 | -2.71416068 | 6.82071365  | 1.68111180 |
| 6 | -0.24777523 | 5.66470446  | 1.83476786 |
| 1 | -0.25939449 | 6.71428177  | 2.13948429 |
| 6 | 0.96641750  | 4.95866418  | 1.87927474 |
| 6 | 0.97916505  | 3.58429671  | 1.47810490 |
| 1 | -0.20320812 | 1.96649608  | 0.74318280 |
| 6 | 2.20155151  | 5.55502108  | 2.31499218 |
| 6 | 2.22195087  | 2.82464803  | 1.53217702 |
| 6 | 3.36770502  | 4.84509494  | 2.36180267 |
| 1 | 2.19043339  | 6.60498653  | 2.61450976 |
| 6 | 3.42653303  | 3.45917121  | 1.97931592 |
| 6 | 2.27619342  | 1.48116324  | 1.16579172 |
| 6 | 4.61271830  | 2.70708635  | 2.02022355 |
| 1 | 4.28759063  | 5.32796319  | 2.69754407 |
| 6 | 3.44304027  | 0.71748667  | 1.22284482 |
| 1 | 1.36771561  | 1.01009042  | 0.80543165 |
| 1 | 5.53513792  | 3.19325581  | 2.34763714 |
| 6 | 4.65450268  | 1.35224305  | 1.64982149 |
| 6 | 3.45832532  | -0.68545333 | 0.84970321 |
| 6 | 5.86323358  | 0.57472918  | 1.66354611 |
| 6 | 4.68768873  | -1.41436699 | 0.85393339 |
| 6 | 2.28233279  | -1.35547796 | 0.48045213 |
| 6 | 5.88251321  | -0.73602559 | 1.27560635 |
| 1 | 6.78716178  | 1.06116987  | 1.98263386 |
| 6 | 4.68644372  | -2.75210484 | 0.41237887 |
| 1 | 1.34101455  | -0.82185168 | 0.54667289 |

|    |             |             |             |
|----|-------------|-------------|-------------|
| 1  | 4.44449345  | -5.25587073 | -0.67496740 |
| 1  | 2.36733248  | -6.35154912 | -1.37486673 |
| 1  | 5.63464814  | -3.29042283 | 0.34926357  |
| 1  | 6.82072893  | -1.29380396 | 1.28005865  |
| 1  | -4.72962619 | -5.00997012 | -1.90987126 |
| 1  | -7.22708483 | 1.64112899  | -0.57291424 |
| 42 | 2.06307419  | -2.46292254 | -2.26951967 |
| 6  | 1.35303428  | -3.04724564 | -3.96788860 |
| 6  | 3.64127959  | -1.85405729 | -3.20182726 |
| 6  | 1.29948580  | -0.75353715 | -2.65264084 |
| 8  | 4.60933628  | -1.47974843 | -3.74143429 |
| 8  | 0.83135168  | 0.29520635  | -2.88894597 |
| 8  | 0.90017225  | -3.41244729 | -4.98277185 |

**IM(IIa-b)-Mo**

|   |             |             |             |
|---|-------------|-------------|-------------|
| 6 | 1.10794838  | -3.37136263 | -0.43247994 |
| 6 | 2.33298512  | -2.70883530 | -0.00768679 |
| 6 | 3.57976242  | -3.42878533 | -0.00151408 |
| 6 | 3.55323808  | -4.81295757 | -0.39811549 |
| 6 | 2.40335659  | -5.43483886 | -0.79684787 |
| 6 | 1.13785759  | -4.74942115 | -0.84826713 |
| 6 | -0.11477094 | -2.66232834 | -0.50460617 |
| 6 | -0.05693089 | -5.34583252 | -1.25752523 |
| 1 | -0.04327833 | -6.39665431 | -1.55692411 |
| 6 | -1.28949181 | -4.64592916 | -1.30278979 |
| 6 | -1.32288806 | -3.27629163 | -0.92267054 |
| 1 | -0.20434622 | -1.71480655 | 0.02984333  |
| 6 | -2.57002549 | -2.54542416 | -0.93965320 |
| 6 | -2.51980998 | -5.27254689 | -1.70097168 |
| 6 | -3.70643513 | -4.59124027 | -1.70349687 |
| 1 | -2.49259514 | -6.32209450 | -1.99988110 |
| 6 | -3.78162707 | -3.20952739 | -1.32164564 |

|   |             |             |             |
|---|-------------|-------------|-------------|
| 6 | -2.63092579 | -1.19050757 | -0.60191512 |
| 6 | -4.98135397 | -2.47563366 | -1.31784883 |
| 1 | -5.90656393 | -2.97654112 | -1.61360321 |
| 6 | -5.03148198 | -1.12099732 | -0.95008918 |
| 6 | -3.81474566 | -0.45964867 | -0.57712258 |
| 1 | -1.70625027 | -0.67651625 | -0.36035079 |
| 6 | -6.25189687 | -0.35855543 | -0.94056028 |
| 6 | -3.84167885 | 0.94441183  | -0.18375725 |
| 6 | -6.27445498 | 0.95954064  | -0.58221652 |
| 1 | -7.17677521 | -0.86047594 | -1.23164238 |
| 6 | -5.08111664 | 1.66065521  | -0.18665292 |
| 6 | -2.68809384 | 1.61691075  | 0.21546537  |
| 6 | -5.08213405 | 3.01084242  | 0.20278957  |
| 1 | -6.02700230 | 3.56021234  | 0.19937896  |
| 6 | -3.91110277 | 3.67786210  | 0.60264950  |
| 6 | -2.67557330 | 2.95454211  | 0.61133310  |
| 1 | -1.75109654 | 1.06981165  | 0.22642582  |
| 6 | -3.89804338 | 5.05745880  | 1.01226796  |
| 6 | -1.44999185 | 3.61736348  | 1.03631239  |
| 6 | -2.74871225 | 5.67904254  | 1.41080577  |
| 1 | -4.84048499 | 5.60867060  | 1.00102499  |
| 6 | -1.48592337 | 4.98945279  | 1.44359635  |
| 6 | -0.22630827 | 2.94829809  | 1.06910949  |
| 1 | -2.77345076 | 6.72656856  | 1.71778180  |
| 6 | -0.29213498 | 5.60138002  | 1.86375318  |
| 1 | -0.31829954 | 6.64760544  | 2.17890832  |
| 6 | 0.93238018  | 4.91288716  | 1.89856822  |
| 6 | 0.96410986  | 3.54348807  | 1.48268577  |
| 1 | -0.20231688 | 1.90742457  | 0.76348197  |
| 6 | 2.15943720  | 5.52077606  | 2.34229213  |
| 6 | 2.22102497  | 2.80462857  | 1.51582755  |
| 6 | 3.33516093  | 4.82633695  | 2.38381890  |

|    |             |             |             |
|----|-------------|-------------|-------------|
| 1  | 2.13338662  | 6.56655066  | 2.65519846  |
| 6  | 3.41626890  | 3.44773204  | 1.97923140  |
| 6  | 2.30065748  | 1.47660045  | 1.10815259  |
| 6  | 4.61313064  | 2.71327394  | 2.00911255  |
| 1  | 4.24681731  | 5.31765533  | 2.72956711  |
| 6  | 3.47851809  | 0.72576015  | 1.15773087  |
| 1  | 1.40415209  | 1.00565752  | 0.71820897  |
| 1  | 5.52644306  | 3.20667963  | 2.35087804  |
| 6  | 4.67816706  | 1.36571417  | 1.61185716  |
| 6  | 3.51132877  | -0.66184211 | 0.75363780  |
| 6  | 5.89225847  | 0.59994283  | 1.62493058  |
| 6  | 4.73269920  | -1.38899725 | 0.78545960  |
| 6  | 2.33380969  | -1.33808311 | 0.34446432  |
| 6  | 5.91937545  | -0.70845158 | 1.22538965  |
| 1  | 6.81010022  | 1.08690588  | 1.95991475  |
| 6  | 4.73397858  | -2.75480444 | 0.40376705  |
| 1  | 1.38322145  | -0.85621446 | 0.58035008  |
| 1  | 4.49350899  | -5.36706978 | -0.38873944 |
| 1  | 2.43213572  | -6.48190581 | -1.10354013 |
| 1  | 5.67983177  | -3.30147212 | 0.42761750  |
| 1  | 6.85837492  | -1.26488645 | 1.24264999  |
| 1  | -4.62526563 | -5.09759030 | -2.00539276 |
| 1  | -7.21792167 | 1.50915588  | -0.58742774 |
| 42 | 1.51330054  | -1.54039118 | -1.96166820 |
| 6  | 0.26070359  | -1.28861549 | -3.44110201 |
| 6  | 2.51552233  | -2.60505137 | -3.19136602 |
| 6  | 2.56747491  | -0.04103279 | -2.64119469 |
| 8  | 3.12818872  | -3.25034217 | -3.95173736 |
| 8  | 3.21310779  | 0.84485339  | -3.03948959 |
| 8  | -0.49042405 | -1.15814969 | -4.32374633 |

Ila-W

|   |             |             |             |
|---|-------------|-------------|-------------|
| 6 | -4.16633113 | 5.10263830  | 0.48624167  |
| 6 | -4.17465879 | 3.66590925  | 0.40318450  |
| 6 | -2.91904128 | 2.98019156  | 0.34678585  |
| 6 | -1.67572327 | 3.73950674  | 0.37960956  |
| 6 | -1.71646307 | 5.16733670  | 0.48056048  |
| 6 | -3.00128748 | 5.81434280  | 0.52519507  |
| 6 | -0.43046020 | 3.11313863  | 0.32880674  |
| 6 | 0.77922179  | 3.80418188  | 0.38953253  |
| 6 | 0.74346340  | 5.23077696  | 0.50733398  |
| 6 | -0.50433542 | 5.87559748  | 0.54070931  |
| 6 | 2.06131558  | 3.11235852  | 0.35923697  |
| 6 | 3.27651646  | 3.86028910  | 0.48414842  |
| 6 | 3.19188634  | 5.29272034  | 0.59511964  |
| 6 | 1.99087797  | 5.94228293  | 0.59926523  |
| 6 | 2.14662232  | 1.72581800  | 0.22508609  |
| 6 | 3.35626591  | 1.03326831  | 0.23595143  |
| 6 | 4.57253978  | 1.77034395  | 0.40137039  |
| 6 | 4.49975080  | 3.16913212  | 0.50452192  |
| 6 | 3.40014658  | -0.41825486 | 0.14310945  |
| 6 | 4.65544650  | -1.10211882 | 0.25742464  |
| 6 | 5.85555756  | -0.31692395 | 0.39913563  |
| 6 | 5.81171359  | 1.04572003  | 0.47007238  |
| 6 | 2.21285938  | -1.19893703 | -0.04485395 |
| 6 | 2.19501039  | -2.61328140 | 0.04671045  |
| 6 | 3.46018284  | -3.31336351 | 0.15862189  |
| 6 | 4.66386780  | -2.54451122 | 0.18933989  |
| 6 | 0.94384271  | -3.37380715 | 0.06059937  |
| 6 | 0.98514865  | -4.80099676 | 0.12397054  |
| 6 | 2.27135946  | -5.45580311 | 0.18268003  |
| 6 | 3.44059500  | -4.75910705 | 0.19917184  |
| 6 | -0.28980366 | -2.73569874 | 0.06775582  |
| 6 | -1.50637174 | -3.42514976 | 0.10878694  |

|   |             |             |            |
|---|-------------|-------------|------------|
| 6 | -1.47563395 | -4.85370562 | 0.13236893 |
| 6 | -0.22642555 | -5.50497409 | 0.14490584 |
| 6 | -2.78217312 | -2.72656869 | 0.14175106 |
| 6 | -4.00307430 | -3.47502196 | 0.17020360 |
| 6 | -3.92441329 | -4.91075262 | 0.16904166 |
| 6 | -2.72509621 | -5.56559415 | 0.15624844 |
| 6 | -2.85676739 | -1.33365714 | 0.16299870 |
| 6 | -4.05907097 | -0.63056695 | 0.21546136 |
| 6 | -5.28347820 | -1.37397569 | 0.23139180 |
| 6 | -5.22280164 | -2.77719388 | 0.20688545 |
| 6 | -4.09428315 | 0.82557783  | 0.26601416 |
| 6 | -5.35257821 | 1.50623600  | 0.32163925 |
| 6 | -6.55723390 | 0.71828614  | 0.31974188 |
| 6 | -6.52460619 | -0.64643624 | 0.27883055 |
| 6 | -2.92673970 | 1.58758196  | 0.27685072 |
| 6 | -5.35931526 | 2.90999141  | 0.38483301 |
| 1 | -3.02899307 | 6.90363133  | 0.59453858 |
| 1 | -5.12527842 | 5.62341630  | 0.52386286 |
| 1 | -6.31875069 | 3.43169841  | 0.42856426 |
| 1 | -7.51561621 | 1.24010899  | 0.35718636 |
| 1 | -7.45668801 | -1.21505507 | 0.28395222 |
| 1 | -6.15572770 | -3.34632769 | 0.22356408 |
| 1 | -4.85615947 | -5.47969042 | 0.18581539 |
| 1 | -2.69853261 | -6.65695883 | 0.16419350 |
| 1 | -0.20193761 | -6.59686168 | 0.18060821 |
| 1 | 2.29148784  | -6.54645412 | 0.21826426 |
| 1 | 4.39667260  | -5.28204448 | 0.24786508 |
| 1 | 5.61966462  | -3.06531516 | 0.24723378 |
| 1 | 6.80947278  | -0.84265187 | 0.45937332 |
| 1 | 6.73757622  | 1.61207921  | 0.58539871 |
| 1 | 5.42598419  | 3.73844371  | 0.61464169 |
| 1 | 4.12081791  | 5.86027438  | 0.67753809 |



|    |             |             |             |
|----|-------------|-------------|-------------|
| 1  | 1.95958671  | 7.03046305  | 0.68335324  |
| 1  | -0.53313495 | 6.96491578  | 0.62486741  |
| 1  | -0.40202127 | 2.03128194  | 0.24935191  |
| 1  | -1.97413249 | 1.06955150  | 0.23908841  |
| 1  | -1.93089661 | -0.76820880 | 0.14658805  |
| 1  | -0.31184104 | -1.65081858 | 0.04857621  |
| 1  | 1.27378155  | -0.68033242 | -0.19110700 |
| 1  | 1.22687552  | 1.16032615  | 0.11662231  |
| 74 | 3.58574247  | -1.93265262 | -1.78354023 |
| 6  | 2.92291435  | -0.57506272 | -3.05304838 |
| 8  | 2.51865083  | 0.25228875  | -3.76823614 |
| 6  | 2.89350480  | -3.27853552 | -3.02497250 |
| 8  | 2.47081495  | -4.10236566 | -3.73726340 |
| 6  | 5.24714900  | -1.99860268 | -2.84346609 |
| 8  | 6.25299008  | -2.03736774 | -3.43376531 |

### **IIb-W**

|   |             |            |            |
|---|-------------|------------|------------|
| 6 | -4.20920486 | 4.96852216 | 0.33814107 |
| 6 | -4.23947025 | 3.53017217 | 0.31214462 |
| 6 | -2.99394182 | 2.82447702 | 0.27843122 |
| 6 | -1.74022664 | 3.56591340 | 0.27278428 |
| 6 | -1.75888548 | 4.99626052 | 0.31290333 |
| 6 | -3.03323416 | 5.66384951 | 0.34077042 |
| 6 | -0.50395494 | 2.91879801 | 0.23811384 |
| 6 | 0.71517236  | 3.59280416 | 0.25389210 |
| 6 | 0.70208735  | 5.02298013 | 0.30616379 |
| 6 | -0.53435950 | 5.68765594 | 0.32842991 |
| 6 | 1.98874834  | 2.87995808 | 0.23327068 |
| 6 | 3.22170497  | 3.61975052 | 0.28793190 |
| 6 | 3.15509879  | 5.05754287 | 0.33423951 |
| 6 | 1.96226992  | 5.72022767 | 0.33919806 |
| 6 | 2.04976432  | 1.49567570 | 0.16542771 |

|   |             |             |            |
|---|-------------|-------------|------------|
| 6 | 3.25401980  | 0.76932301  | 0.18883203 |
| 6 | 4.49414129  | 1.50807215  | 0.25676655 |
| 6 | 4.43291069  | 2.92290527  | 0.28580036 |
| 6 | 3.26919132  | -0.70160476 | 0.19057091 |
| 6 | 4.52426667  | -1.41449535 | 0.26028607 |
| 6 | 5.75097229  | -0.64444467 | 0.22155147 |
| 6 | 5.73645286  | 0.76338281  | 0.21989896 |
| 6 | 2.08016410  | -1.45266947 | 0.16886932 |
| 6 | 2.04770244  | -2.83774026 | 0.24008468 |
| 6 | 3.29560624  | -3.55186789 | 0.29661548 |
| 6 | 4.49220084  | -2.83021858 | 0.29280223 |
| 6 | 0.78911773  | -3.57665896 | 0.26216825 |
| 6 | 0.80536407  | -5.00667478 | 0.31787535 |
| 6 | 2.07964244  | -5.67772141 | 0.35274939 |
| 6 | 3.25858026  | -4.99062053 | 0.34637191 |
| 6 | -0.44363367 | -2.92792567 | 0.24476222 |
| 6 | -1.66635413 | -3.60026484 | 0.28096201 |
| 6 | -1.65558845 | -5.03059900 | 0.32443496 |
| 6 | -0.41711901 | -5.69661505 | 0.34163888 |
| 6 | -2.93508677 | -2.88480211 | 0.28491566 |
| 6 | -4.16581770 | -3.61593461 | 0.32027326 |
| 6 | -4.10594404 | -5.05328875 | 0.34959164 |
| 6 | -2.91590469 | -5.72423447 | 0.35384162 |
| 6 | -2.99165466 | -1.49172792 | 0.26646615 |
| 6 | -4.18495995 | -0.77137529 | 0.28510664 |
| 6 | -5.41889539 | -1.49709284 | 0.31630101 |
| 6 | -5.37633954 | -2.90166020 | 0.33109905 |
| 6 | -4.19998302 | 0.68574304  | 0.28345966 |
| 6 | -5.44861391 | 1.38594651  | 0.31304215 |
| 6 | -6.66383505 | 0.61479766  | 0.33512090 |
| 6 | -6.64975479 | -0.75111087 | 0.33666177 |
| 6 | -3.02178340 | 1.43049302  | 0.26314486 |

|    |             |             |             |
|----|-------------|-------------|-------------|
| 6  | -5.43501647 | 2.79112501  | 0.32464059  |
| 1  | -3.04451185 | 6.75531340  | 0.36537895  |
| 1  | -5.15991155 | 5.50503794  | 0.36013975  |
| 1  | -6.38675336 | 3.32796084  | 0.34896771  |
| 1  | -7.61516007 | 1.15035246  | 0.35339499  |
| 1  | -7.58983766 | -1.30612052 | 0.35616730  |
| 1  | -6.31680898 | -3.45794314 | 0.35667359  |
| 1  | -5.04539746 | -5.60922365 | 0.37283137  |
| 1  | -2.90469667 | -6.81563890 | 0.38099445  |
| 1  | -0.40585201 | -6.78881329 | 0.37940059  |
| 1  | 2.08632837  | -6.76893594 | 0.38897598  |
| 1  | 4.20689189  | -5.53025922 | 0.37631030  |
| 1  | 5.44060146  | -3.37050479 | 0.32808817  |
| 1  | 6.70280080  | -1.17364193 | 0.22895217  |
| 1  | 6.67716650  | 1.31211126  | 0.22611151  |
| 1  | 5.36997684  | 3.48270288  | 0.31971694  |
| 1  | 4.09210091  | 5.61666444  | 0.36272145  |
| 1  | 1.94648523  | 6.81143166  | 0.37281200  |
| 1  | -0.54557149 | 6.77994193  | 0.36359564  |
| 1  | -0.49373803 | 1.83421416  | 0.20340851  |
| 1  | -2.07714158 | 0.89742301  | 0.24044899  |
| 1  | -2.05819582 | -0.93935578 | 0.24257445  |
| 1  | -0.45573915 | -1.84343712 | 0.20750319  |
| 1  | 1.14106373  | -0.91297960 | 0.11488663  |
| 1  | 1.12198263  | 0.93661199  | 0.11288027  |
| 74 | 4.67484172  | 0.04612559  | -1.73452205 |
| 6  | 5.62960709  | -1.27321716 | -2.80300609 |
| 6  | 3.23878889  | 0.02915159  | -3.09649552 |
| 6  | 5.60218392  | 1.38202994  | -2.80659745 |
| 8  | 6.17688054  | 2.19254122  | -3.42373392 |
| 8  | 6.22088359  | -2.07341091 | -3.41794198 |
| 8  | 2.37511476  | 0.01883959  | -3.87918632 |

### TS(Ila-b)-W

|   |             |             |             |
|---|-------------|-------------|-------------|
| 6 | -4.12014523 | 5.14189253  | 0.35789473  |
| 6 | -4.15965011 | 3.70441782  | 0.30057126  |
| 6 | -2.91776449 | 2.99299036  | 0.27090487  |
| 6 | -1.65883667 | 3.72401672  | 0.30700820  |
| 6 | -1.66860432 | 5.15473148  | 0.37778302  |
| 6 | -2.93987210 | 5.82909084  | 0.39599511  |
| 6 | -0.43072774 | 3.06668889  | 0.28290483  |
| 6 | 0.79540212  | 3.72956578  | 0.33809942  |
| 6 | 0.79177702  | 5.16147956  | 0.41494453  |
| 6 | -0.44156520 | 5.83572267  | 0.42854786  |
| 6 | 2.05568777  | 3.00634767  | 0.32059485  |
| 6 | 3.28439046  | 3.73260878  | 0.39104606  |
| 6 | 3.23764614  | 5.16652343  | 0.46713149  |
| 6 | 2.05247601  | 5.84680121  | 0.47604543  |
| 6 | 2.10884235  | 1.60487302  | 0.24363455  |
| 6 | 3.30418936  | 0.90085414  | 0.21499585  |
| 6 | 4.53687640  | 1.62149749  | 0.31332435  |
| 6 | 4.49881412  | 3.01645909  | 0.39300408  |
| 6 | 3.34254769  | -0.55796653 | 0.10313786  |
| 6 | 4.58008387  | -1.28039375 | 0.34082596  |
| 6 | 5.80039753  | -0.49914658 | 0.35162050  |
| 6 | 5.76745321  | 0.87077638  | 0.32062209  |
| 6 | 2.21067526  | -1.35229735 | -0.22700084 |
| 6 | 2.11693350  | -2.73295303 | 0.12398197  |
| 6 | 3.33713619  | -3.43676107 | 0.34803757  |
| 6 | 4.56228324  | -2.70066567 | 0.31544216  |
| 6 | 0.86076642  | -3.43513614 | 0.18731055  |
| 6 | 0.85641238  | -4.85901954 | 0.38923906  |
| 6 | 2.10803779  | -5.53300981 | 0.55011530  |
| 6 | 3.29681198  | -4.85056133 | 0.54691240  |

|   |             |             |            |
|---|-------------|-------------|------------|
| 6 | -0.37085260 | -2.77071769 | 0.10945338 |
| 6 | -1.59748952 | -3.42646420 | 0.20424038 |
| 6 | -1.60097601 | -4.85590183 | 0.34141547 |
| 6 | -0.37534730 | -5.53103554 | 0.43688509 |
| 6 | -2.86715003 | -2.70710461 | 0.19609333 |
| 6 | -4.10065704 | -3.43372579 | 0.25988346 |
| 6 | -4.04984870 | -4.86867135 | 0.34376012 |
| 6 | -2.86324382 | -5.54201693 | 0.39485341 |
| 6 | -2.92224754 | -1.31559636 | 0.16353161 |
| 6 | -4.11632371 | -0.59333396 | 0.19435262 |
| 6 | -5.35143825 | -1.31528208 | 0.23030995 |
| 6 | -5.30998442 | -2.71934275 | 0.26027075 |
| 6 | -4.13085305 | 0.86172912  | 0.21316668 |
| 6 | -5.37715773 | 1.56583030  | 0.24597385 |
| 6 | -6.59387378 | 0.79784422  | 0.25335659 |
| 6 | -6.58132399 | -0.56828416 | 0.24954005 |
| 6 | -2.95023989 | 1.60159840  | 0.22343641 |
| 6 | -5.35839019 | 2.97096852  | 0.28314473 |
| 1 | -2.94517984 | 6.91986107  | 0.44348678 |
| 1 | -5.06741896 | 5.68467022  | 0.37518369 |
| 1 | -6.30827793 | 3.51101963  | 0.30838727 |
| 1 | -7.54449703 | 1.33465512  | 0.27103837 |
| 1 | -7.52186559 | -1.12257357 | 0.26540911 |
| 1 | -6.25020560 | -3.27513652 | 0.30006197 |
| 1 | -4.99256555 | -5.41794651 | 0.38387772 |
| 1 | -2.85479479 | -6.63046107 | 0.47915282 |
| 1 | -0.37866967 | -6.61586210 | 0.56861716 |
| 1 | 2.10105029  | -6.61508840 | 0.69374643 |
| 1 | 4.23775888  | -5.38475074 | 0.68788791 |
| 1 | 5.50751235  | -3.23541875 | 0.41704469 |
| 1 | 6.75243843  | -1.02869389 | 0.40071603 |
| 1 | 6.70742833  | 1.42607680  | 0.33348558 |

|    |             |             |             |
|----|-------------|-------------|-------------|
| 1  | 5.43825239  | 3.57030184  | 0.46200082  |
| 1  | 4.18190401  | 5.71212254  | 0.51681875  |
| 1  | 2.04808642  | 6.93706457  | 0.53217297  |
| 1  | -0.44456501 | 6.92726774  | 0.48282812  |
| 1  | -0.42556560 | 1.98364593  | 0.22032599  |
| 1  | -2.00780327 | 1.06503013  | 0.20736222  |
| 1  | -1.98675561 | -0.76635801 | 0.13212798  |
| 1  | -0.36285067 | -1.69009284 | -0.00295466 |
| 1  | 1.31412951  | -0.83590701 | -0.56057828 |
| 1  | 1.18117294  | 1.03975456  | 0.21631452  |
| 74 | 4.19275605  | -1.40696817 | -1.92370404 |
| 6  | 5.65639797  | -1.88414593 | -3.12933457 |
| 6  | 3.03646631  | -2.58918341 | -2.92099594 |
| 6  | 3.74066820  | -0.00797986 | -3.18212388 |
| 8  | 3.46897436  | 0.87335628  | -3.90628367 |
| 8  | 6.54527496  | -2.16445046 | -3.83732712 |
| 8  | 2.32966634  | -3.33372957 | -3.48308765 |

**TS'(IIa-b)-W**

|   |             |             |             |
|---|-------------|-------------|-------------|
| 6 | 1.00789232  | -3.46931135 | -0.32641026 |
| 6 | 2.23099763  | -2.84388169 | 0.17083155  |
| 6 | 3.49522507  | -3.50944661 | -0.02502667 |
| 6 | 3.47655712  | -4.86322831 | -0.50995910 |
| 6 | 2.31283687  | -5.49610908 | -0.85475714 |
| 6 | 1.04817261  | -4.82173990 | -0.81897401 |
| 6 | -0.21196877 | -2.77313809 | -0.34089515 |
| 6 | -0.14726825 | -5.40002973 | -1.26499863 |
| 1 | -0.13117026 | -6.43214319 | -1.62314752 |
| 6 | -1.36435114 | -4.69343387 | -1.28946923 |
| 6 | -1.39104763 | -3.33242539 | -0.84304985 |
| 1 | -0.24224016 | -1.76727502 | 0.06425181  |
| 6 | -2.62944190 | -2.57204520 | -0.91635700 |

|   |             |             |             |
|---|-------------|-------------|-------------|
| 6 | -2.59019239 | -5.28953656 | -1.74502697 |
| 6 | -3.76395596 | -4.59014592 | -1.76362327 |
| 1 | -2.56726740 | -6.32910639 | -2.07709784 |
| 6 | -3.83199758 | -3.21249205 | -1.35916800 |
| 6 | -2.68093247 | -1.21839147 | -0.58637289 |
| 6 | -5.02161173 | -2.46635341 | -1.39814234 |
| 1 | -5.94115659 | -2.95617769 | -1.72823799 |
| 6 | -5.06742721 | -1.11067070 | -1.03210102 |
| 6 | -3.85457736 | -0.46509272 | -0.62759759 |
| 1 | -1.75942610 | -0.72273040 | -0.29862341 |
| 6 | -6.28123946 | -0.33788887 | -1.05066172 |
| 6 | -3.87371790 | 0.94380609  | -0.25955147 |
| 6 | -6.30131014 | 0.97820613  | -0.68515391 |
| 1 | -7.20344441 | -0.83199865 | -1.36285682 |
| 6 | -5.10841671 | 1.66886590  | -0.27221614 |
| 6 | -2.71367106 | 1.61427383  | 0.12323912  |
| 6 | -5.10355384 | 3.01939115  | 0.11662823  |
| 1 | -6.04469025 | 3.57507643  | 0.10660887  |
| 6 | -3.93040970 | 3.67722548  | 0.52475151  |
| 6 | -2.69838206 | 2.94810717  | 0.52708466  |
| 1 | -1.77462282 | 1.07213132  | 0.10270132  |
| 6 | -3.90916980 | 5.05371377  | 0.94410528  |
| 6 | -1.47088915 | 3.59753047  | 0.96502993  |
| 6 | -2.75683510 | 5.66463636  | 1.35140586  |
| 1 | -4.84770232 | 5.61168307  | 0.93388980  |
| 6 | -1.49922486 | 4.96588291  | 1.38594805  |
| 6 | -0.25710914 | 2.91345353  | 1.00440790  |
| 1 | -2.77580700 | 6.71017463  | 1.66565129  |
| 6 | -0.30233055 | 5.56585004  | 1.81309862  |
| 1 | -0.31792808 | 6.61337259  | 2.12461433  |
| 6 | 0.91401310  | 4.86320232  | 1.85501592  |
| 6 | 0.93157801  | 3.48997417  | 1.44833048  |

|    |             |             |             |
|----|-------------|-------------|-------------|
| 1  | -0.23358106 | 1.88426573  | 0.66328716  |
| 6  | 2.14902958  | 5.46434653  | 2.28155323  |
| 6  | 2.17280460  | 2.73225340  | 1.50519846  |
| 6  | 3.32134507  | 4.76277365  | 2.30419094  |
| 1  | 2.13567249  | 6.51315506  | 2.58509425  |
| 6  | 3.38161390  | 3.37805079  | 1.91971282  |
| 6  | 2.22709820  | 1.38012968  | 1.15912092  |
| 6  | 4.57927580  | 2.64068190  | 1.91989536  |
| 1  | 4.24438250  | 5.25155028  | 2.62207287  |
| 6  | 3.40386095  | 0.63549736  | 1.18538018  |
| 1  | 1.32108508  | 0.89222643  | 0.81298817  |
| 1  | 5.50717264  | 3.14098190  | 2.20787331  |
| 6  | 4.62523976  | 1.28821353  | 1.54820624  |
| 6  | 3.41697584  | -0.77388945 | 0.81706675  |
| 6  | 5.84885871  | 0.53450026  | 1.49311507  |
| 6  | 4.67550359  | -1.48049585 | 0.74532896  |
| 6  | 2.20968319  | -1.50013780 | 0.65818010  |
| 6  | 5.87364492  | -0.77263235 | 1.09392705  |
| 1  | 6.77917999  | 1.03928677  | 1.76008946  |
| 6  | 4.68224342  | -2.81911564 | 0.32999885  |
| 1  | 1.27928836  | -1.07081877 | 1.01738969  |
| 1  | 4.43033015  | -5.38595512 | -0.60032233 |
| 1  | 2.34111692  | -6.52531794 | -1.21620448 |
| 1  | 5.63546858  | -3.34714497 | 0.25780833  |
| 1  | 6.82201707  | -1.30972906 | 1.03686761  |
| 1  | -4.68068302 | -5.07352907 | -2.10738012 |
| 1  | -7.24054209 | 1.53480739  | -0.70360537 |
| 74 | 2.38440513  | -1.54570658 | -1.71279478 |
| 6  | 1.82355846  | -2.19347480 | -3.45747755 |
| 6  | 3.84056025  | -0.57533779 | -2.54603514 |
| 6  | 1.25565777  | -0.02898838 | -2.04664188 |
| 8  | 4.74739975  | -0.00126313 | -3.01446483 |



8 0.54759297 0.89631723 -2.20298295  
8 1.44195506 -2.60726626 -4.48455495

**TS''(IIa-b)-W**

6 1.00737004 -3.38139542 -0.27017611  
6 2.25212543 -2.72513862 0.15022938  
6 3.51792049 -3.40113516 -0.00847582  
6 3.50055511 -4.71453685 -0.61453251  
6 2.34008395 -5.32637644 -1.00647378  
6 1.04347602 -4.70563537 -0.84427013  
6 -0.20490397 -2.67346645 -0.33981864  
6 -0.15972146 -5.30465511 -1.24900101  
1 -0.13113758 -6.31964771 -1.65066969  
6 -1.39034938 -4.61917352 -1.20584663  
6 -1.40470613 -3.25321183 -0.78749541  
1 -0.23643023 -1.66797483 0.06400513  
6 -2.63923512 -2.49296410 -0.82989869  
6 -2.62947747 -5.22305932 -1.61036228  
6 -3.80295307 -4.52129969 -1.60695731  
1 -2.61783903 -6.26761153 -1.92673273  
6 -3.85679464 -3.13705672 -1.22621340  
6 -2.67867647 -1.13410195 -0.51151496  
6 -5.04361003 -2.38521357 -1.24482930  
1 -5.97359399 -2.87479442 -1.54457438  
6 -5.07419493 -1.02420561 -0.89769579  
6 -3.84966570 -0.37868504 -0.52616929  
1 -1.74883037 -0.63633239 -0.25667104  
6 -6.28338098 -0.24445273 -0.90628377  
6 -3.85544076 1.03419514 -0.16771482  
6 -6.28856346 1.07804027 -0.56431535  
1 -7.21390644 -0.73745985 -1.19457342  
6 -5.08547578 1.76702921 -0.17856059

|   |             |             |            |
|---|-------------|-------------|------------|
| 6 | -2.68934750 | 1.70058046  | 0.20477870 |
| 6 | -5.06807565 | 3.12280891  | 0.19033252 |
| 1 | -6.00581318 | 3.68421038  | 0.18151199 |
| 6 | -3.88742894 | 3.77942415  | 0.57785536 |
| 6 | -2.66030988 | 3.04188292  | 0.58554622 |
| 1 | -1.75636672 | 1.14702405  | 0.20134732 |
| 6 | -3.85608026 | 5.16245436  | 0.97458630 |
| 6 | -1.42577687 | 3.69254443  | 1.00307202 |
| 6 | -2.69835358 | 5.77260362  | 1.36630990 |
| 1 | -4.79160226 | 5.72531090  | 0.96061360 |
| 6 | -1.44474120 | 5.06679382  | 1.40423881 |
| 6 | -0.21246206 | 3.00606995  | 1.04221547 |
| 1 | -2.70930506 | 6.82272597  | 1.66518676 |
| 6 | -0.24386044 | 5.66529569  | 1.82248261 |
| 1 | -0.25528526 | 6.71484136  | 2.12731740 |
| 6 | 0.96953981  | 4.95822043  | 1.86973338 |
| 6 | 0.98220560  | 3.58389213  | 1.46822238 |
| 1 | -0.19897265 | 1.96794203  | 0.72758052 |
| 6 | 2.20382495  | 5.55372076  | 2.30888075 |
| 6 | 2.22368490  | 2.82233361  | 1.52731918 |
| 6 | 3.36905589  | 4.84262051  | 2.35920009 |
| 1 | 2.19276475  | 6.60378951  | 2.60801045 |
| 6 | 3.42747359  | 3.45649877  | 1.97779122 |
| 6 | 2.27744357  | 1.47824274  | 1.16315193 |
| 6 | 4.61331995  | 2.70438587  | 2.02119924 |
| 1 | 4.28859533  | 5.32457371  | 2.69715406 |
| 6 | 3.44375625  | 0.71327943  | 1.22601257 |
| 1 | 1.37097170  | 1.00826731  | 0.79597955 |
| 1 | 5.53560329  | 3.19094552  | 2.34839862 |
| 6 | 4.65548028  | 1.34938491  | 1.65196673 |
| 6 | 3.45975562  | -0.68913990 | 0.85610433 |
| 6 | 5.86507087  | 0.57426768  | 1.66197179 |

|    |             |             |             |
|----|-------------|-------------|-------------|
| 6  | 4.69100033  | -1.41374739 | 0.84920987  |
| 6  | 2.27928568  | -1.36390477 | 0.49943656  |
| 6  | 5.88579458  | -0.73490928 | 1.26808608  |
| 1  | 6.78899037  | 1.06148145  | 1.97985706  |
| 6  | 4.69358866  | -2.74636845 | 0.39070955  |
| 1  | 1.33556415  | -0.83920847 | 0.59516969  |
| 1  | 4.45709099  | -5.21027400 | -0.78690693 |
| 1  | 2.38147629  | -6.30458622 | -1.48795318 |
| 1  | 5.64474860  | -3.27512905 | 0.30085326  |
| 1  | 6.82532733  | -1.29041758 | 1.26543438  |
| 1  | -4.72964809 | -5.00934143 | -1.91535230 |
| 1  | -7.22404449 | 1.64099855  | -0.57839242 |
| 74 | 2.03056689  | -2.44898508 | -2.19140147 |
| 6  | 1.31809505  | -3.07689515 | -3.88102147 |
| 6  | 3.63636262  | -1.85450875 | -3.09970382 |
| 6  | 1.25453756  | -0.73602702 | -2.56749658 |
| 8  | 4.63239568  | -1.50014255 | -3.60538614 |
| 8  | 0.77227479  | 0.31442371  | -2.77851534 |
| 8  | 0.85918410  | -3.48993493 | -4.87710623 |

**IM(IIa-b)-W**

|   |             |             |             |
|---|-------------|-------------|-------------|
| 6 | 1.11165569  | -3.37260903 | -0.43767285 |
| 6 | 2.33493472  | -2.71103601 | -0.01347927 |
| 6 | 3.58253121  | -3.43176171 | -0.00016767 |
| 6 | 3.55268412  | -4.81848826 | -0.38741000 |
| 6 | 2.40255389  | -5.44050282 | -0.78623203 |
| 6 | 1.13831453  | -4.75364477 | -0.84772936 |
| 6 | -0.10672964 | -2.64636858 | -0.53524509 |
| 6 | -0.05638722 | -5.34645749 | -1.25679785 |
| 1 | -0.04699279 | -6.39959613 | -1.54794313 |
| 6 | -1.28880165 | -4.64152389 | -1.30926137 |
| 6 | -1.32064777 | -3.26981125 | -0.94494404 |

|   |             |             |             |
|---|-------------|-------------|-------------|
| 1 | -0.20974993 | -1.72141802 | 0.03847637  |
| 6 | -2.56576696 | -2.54071986 | -0.96196109 |
| 6 | -2.51959930 | -5.27243046 | -1.69775635 |
| 6 | -3.70744708 | -4.59260830 | -1.69980508 |
| 1 | -2.49251426 | -6.32460023 | -1.98731478 |
| 6 | -3.78076463 | -3.20905799 | -1.32795566 |
| 6 | -2.62487544 | -1.18215728 | -0.63451801 |
| 6 | -4.98129459 | -2.47645584 | -1.31696544 |
| 1 | -5.90874310 | -2.98007666 | -1.60087082 |
| 6 | -5.02983784 | -1.12079214 | -0.95382855 |
| 6 | -3.81008535 | -0.45490932 | -0.59720364 |
| 1 | -1.69741539 | -0.66466114 | -0.41138966 |
| 6 | -6.25211043 | -0.36173050 | -0.93213999 |
| 6 | -3.83755169 | 0.94896320  | -0.20225641 |
| 6 | -6.27480862 | 0.95631891  | -0.57380234 |
| 1 | -7.17855093 | -0.86664991 | -1.21283183 |
| 6 | -5.07961571 | 1.66052875  | -0.18944075 |
| 6 | -2.68277612 | 1.62357623  | 0.18944804  |
| 6 | -5.08199960 | 3.00862401  | 0.20682606  |
| 1 | -6.02897520 | 3.55428785  | 0.21562504  |
| 6 | -3.91009565 | 3.67727973  | 0.60135685  |
| 6 | -2.67196319 | 2.95849443  | 0.59498151  |
| 1 | -1.74386418 | 1.07961357  | 0.18924495  |
| 6 | -3.89941048 | 5.05332639  | 1.02273644  |
| 6 | -1.44649624 | 3.62124999  | 1.01994171  |
| 6 | -2.75012046 | 5.67488379  | 1.42128153  |
| 1 | -4.84379851 | 5.60130848  | 1.02173180  |
| 6 | -1.48526788 | 4.98867091  | 1.44222428  |
| 6 | -0.22085766 | 2.95502956  | 1.04316971  |
| 1 | -2.77660562 | 6.71928440  | 1.73858211  |
| 6 | -0.29248401 | 5.59888143  | 1.86769236  |
| 1 | -0.32092894 | 6.64130546  | 2.19500525  |

|    |             |             |             |
|----|-------------|-------------|-------------|
| 6  | 0.93321003  | 4.91237687  | 1.89562398  |
| 6  | 0.96797841  | 3.54788262  | 1.46416199  |
| 1  | -0.19458157 | 1.91750258  | 0.72647051  |
| 6  | 2.15791046  | 5.51689704  | 2.35037286  |
| 6  | 2.22530459  | 2.80914445  | 1.49567468  |
| 6  | 3.33354388  | 4.82238572  | 2.39178738  |
| 1  | 2.12965177  | 6.55949664  | 2.67350179  |
| 6  | 3.41726090  | 3.44757263  | 1.97528212  |
| 6  | 2.30772606  | 1.48548306  | 1.07599453  |
| 6  | 4.61330542  | 2.71250811  | 2.00999857  |
| 1  | 4.24304922  | 5.31038714  | 2.74770585  |
| 6  | 3.48407941  | 0.73115796  | 1.13590157  |
| 1  | 1.41638629  | 1.01936107  | 0.66854706  |
| 1  | 5.52382031  | 3.20289661  | 2.36338003  |
| 6  | 4.68054478  | 1.36700315  | 1.60602421  |
| 6  | 3.51635509  | -0.65386617 | 0.73235303  |
| 6  | 5.89193069  | 0.59896111  | 1.62872957  |
| 6  | 4.73221604  | -1.38522753 | 0.77854179  |
| 6  | 2.33326975  | -1.32677339 | 0.31089111  |
| 6  | 5.91763974  | -0.70937295 | 1.22780086  |
| 1  | 6.80816162  | 1.08226361  | 1.97318935  |
| 6  | 4.73387164  | -2.75579014 | 0.40425450  |
| 1  | 1.38627488  | -0.85827005 | 0.59197047  |
| 1  | 4.49153162  | -5.37486666 | -0.37248950 |
| 1  | 2.43093616  | -6.48927942 | -1.08702469 |
| 1  | 5.67921721  | -3.30275550 | 0.43765243  |
| 1  | 6.85412197  | -1.26971071 | 1.25352437  |
| 1  | -4.62746542 | -5.10240598 | -1.99201355 |
| 1  | -7.21994140 | 1.50305658  | -0.56861994 |
| 74 | 1.51524362  | -1.55886049 | -1.93844209 |
| 6  | 0.24258613  | -1.28494589 | -3.40713751 |
| 6  | 2.51859563  | -2.61398235 | -3.18609378 |

|   |             |             |             |
|---|-------------|-------------|-------------|
| 6 | 2.55552533  | -0.03398220 | -2.60501194 |
| 8 | 3.13366558  | -3.26714507 | -3.94100425 |
| 8 | 3.19509277  | 0.86561436  | -2.98642284 |
| 8 | -0.52475870 | -1.14627633 | -4.27647546 |

**Illa-Cr**

|   |             |             |             |
|---|-------------|-------------|-------------|
| 6 | 1.02916421  | -0.36185890 | 0.93077136  |
| 6 | 1.25160213  | 0.69965897  | 0.00005203  |
| 6 | 0.19908762  | 1.11083524  | -0.88538223 |
| 6 | -1.07062169 | 0.45654610  | -0.83778475 |
| 6 | -1.29447806 | -0.60979939 | 0.09690149  |
| 6 | -0.24634712 | -1.01888441 | 0.97815037  |
| 6 | -0.47243871 | -2.07504911 | 1.91651412  |
| 6 | 2.07464083  | -0.76415002 | 1.82035749  |
| 6 | 2.51954456  | 1.36135616  | -0.04024541 |
| 6 | 0.41833537  | 2.18083558  | -1.80909250 |
| 6 | -2.12294229 | 0.87304760  | -1.71314513 |
| 6 | -2.56890998 | -1.25712455 | 0.15203151  |
| 6 | 1.83850004  | -1.81108044 | 2.74952902  |
| 6 | 3.32618645  | -0.10242366 | 1.77434514  |
| 6 | 2.72494615  | 2.42448806  | -0.95811463 |
| 6 | 3.54805299  | 0.95799872  | 0.84611236  |
| 6 | -0.62974923 | 2.58752772  | -2.67077406 |
| 6 | 1.67918081  | 2.83242911  | -1.83853287 |
| 6 | -1.73826445 | -2.70863437 | 1.96559166  |
| 6 | 0.57071253  | -2.46343366 | 2.79737366  |
| 6 | -2.78420817 | -2.30068072 | 1.08530606  |
| 6 | -3.60687466 | -0.83391503 | -0.71900494 |
| 6 | -3.38487199 | 0.22642881  | -1.64720328 |
| 6 | -1.89753957 | 1.93504327  | -2.62282230 |
| 6 | 2.87904846  | -2.20961550 | 3.63860638  |

|   |             |             |             |
|---|-------------|-------------|-------------|
| 6 | 4.36759208  | -0.50071165 | 2.66454257  |
| 6 | 4.81136840  | 1.62010713  | 0.80833208  |
| 6 | 3.98723613  | 3.08580900  | -0.99649296 |
| 6 | -4.05659458 | -2.94355338 | 1.14320550  |
| 6 | -4.87802847 | -1.47649387 | -0.66176853 |
| 6 | -4.43439406 | 0.64318787  | -2.51726424 |
| 6 | -2.94803863 | 2.35288534  | -3.49325839 |
| 6 | 2.64953517  | -3.26164444 | 4.57028617  |
| 6 | 4.14121635  | -1.55432905 | 3.59185936  |
| 6 | 5.02726823  | 2.67996127  | -0.11432440 |
| 6 | -4.27609129 | -3.99428490 | 2.07755803  |
| 6 | -5.09821548 | -2.53088327 | 0.26798865  |
| 6 | -5.70122831 | -0.00422398 | -2.45873259 |
| 6 | -4.21184584 | 1.70399988  | -3.43908613 |
| 6 | -5.92199386 | -1.05903617 | -1.53546025 |
| 6 | -1.96495534 | -3.75944404 | 2.90378284  |
| 6 | 0.34470978  | -3.51372066 | 3.73440463  |
| 6 | -3.23444457 | -4.40055991 | 2.95434920  |
| 6 | -0.92208362 | -4.15981725 | 3.78316967  |
| 6 | 3.70625211  | -3.65933680 | 5.46203308  |
| 6 | 1.38840730  | -3.91055670 | 4.61795589  |
| 6 | -5.56024388 | -4.63907600 | 2.12711242  |
| 6 | -6.37912625 | -3.17960794 | 0.32464646  |
| 6 | -7.20095232 | -1.71506662 | -1.47291864 |
| 6 | -7.39922756 | -2.74765839 | -0.55713496 |
| 6 | -6.57141624 | -4.22352551 | 1.25981563  |
| 6 | -5.26934290 | 2.12320912  | -4.31705712 |
| 6 | -6.75394379 | 0.42091433  | -3.34253444 |
| 6 | -8.02147232 | -0.25576859 | -3.25840571 |
| 6 | -6.51845150 | 1.46092348  | -4.24093458 |
| 6 | 3.44127035  | -4.72700688 | 6.39018568  |
| 6 | -8.23362310 | -1.26951858 | -2.37107952 |

|   |             |             |             |
|---|-------------|-------------|-------------|
| 1 | -8.82281774 | 0.06444062  | -3.93095029 |
| 6 | 1.15250771  | -4.97340362 | 5.55856992  |
| 6 | -1.14945783 | -5.21946339 | 4.72673806  |
| 6 | -3.45348645 | -5.46079595 | 3.90050140  |
| 6 | -5.74826549 | -5.69848897 | 3.08280221  |
| 6 | 4.20071270  | 4.15036767  | -1.91768009 |
| 6 | 1.89664552  | 3.90117205  | -2.75641946 |
| 6 | -0.41254287 | 3.65763802  | -3.58907748 |
| 6 | -2.72480695 | 3.41770725  | -4.41060182 |
| 6 | -5.02164216 | 3.18180119  | -5.22217262 |
| 6 | -3.78773681 | 3.83041582  | -5.28645904 |
| 6 | -1.46212816 | 4.06748834  | -4.45834294 |
| 6 | 0.85046007  | 4.30908983  | -3.63036199 |
| 6 | 5.47876443  | 4.81027441  | -1.95165700 |
| 6 | 3.16041268  | 4.55613924  | -2.79342298 |
| 6 | -4.74824519 | -6.08853797 | 3.92458081  |
| 6 | -0.09418300 | -5.59699902 | 5.59191220  |
| 6 | -2.41884703 | -5.84321708 | 4.75525811  |
| 6 | 2.22924732  | -5.35067141 | 6.43600552  |
| 1 | -7.32423015 | 1.77885887  | -4.91070338 |
| 1 | -5.82661481 | 3.50103349  | -5.89226815 |
| 6 | 4.93755855  | -3.00781474 | 5.40173850  |
| 6 | 5.19055746  | -1.95699782 | 4.48714196  |
| 6 | 5.62735010  | 0.15975173  | 2.61959995  |
| 6 | 5.84833459  | 1.21591959  | 1.69519784  |
| 6 | 6.30018748  | 3.34550979  | -0.15408419 |
| 6 | 6.48756082  | 4.39889077  | -1.08142517 |
| 6 | 7.31589246  | 2.92322400  | 0.73543272  |
| 6 | 7.11949826  | 1.88615405  | 1.64826553  |
| 6 | 6.67251508  | -0.24997768 | 3.51793845  |
| 6 | 6.43484666  | -1.28721197 | 4.42071289  |
| 6 | 7.93444020  | 0.43802247  | 3.44545919  |



|    |             |             |             |
|----|-------------|-------------|-------------|
| 6  | 8.14661293  | 1.45198691  | 2.55797518  |
| 6  | 5.66145492  | 5.88124967  | -2.89571357 |
| 6  | 3.37213966  | 5.63197103  | -3.72497571 |
| 6  | 1.07012156  | 5.38552781  | -4.55655066 |
| 6  | -1.23389732 | 5.14462441  | -5.38297515 |
| 6  | -3.52828170 | 4.90953157  | -6.20254854 |
| 6  | -2.31604039 | 5.53335341  | -6.24836179 |
| 6  | 2.33678370  | 6.01794217  | -4.57543096 |
| 6  | 0.01215071  | 5.77221478  | -5.41237610 |
| 6  | 4.66163737  | 6.27123556  | -3.73733208 |
| 1  | -2.14401319 | 6.35151002  | -6.95409501 |
| 1  | 0.17915058  | 6.59164012  | -6.11917643 |
| 1  | 2.50532182  | 6.83727746  | -5.28199455 |
| 1  | 4.82561171  | 7.08820672  | -4.44632859 |
| 1  | -4.33509542 | 5.22396834  | -6.87128904 |
| 1  | -4.91652651 | -6.89687388 | 4.64242991  |
| 1  | -2.59244603 | -6.65153900 | 5.47317007  |
| 1  | -0.26628884 | -6.40535760 | 6.31016591  |
| 1  | 2.05279880  | -6.16000144 | 7.15074677  |
| 1  | 8.73183978  | 0.12656773  | 4.12676885  |
| 1  | 7.23530334  | -1.59432096 | 5.10179030  |
| 1  | 5.73718948  | -3.31613508 | 6.08326313  |
| 1  | 4.24399791  | -5.03248675 | 7.06791411  |
| 24 | 0.55303943  | -1.16261549 | -1.19559296 |
| 6  | 1.36743994  | -2.77518884 | -0.86302372 |
| 6  | 1.80492810  | -0.87453782 | -2.50863215 |
| 6  | -0.47728002 | -2.01558903 | -2.45459990 |
| 8  | -1.14021390 | -2.55072168 | -3.24884360 |
| 8  | 2.60003570  | -0.68071952 | -3.33743226 |
| 8  | 1.88315324  | -3.79555876 | -0.64039479 |
| 1  | -6.72405823 | -6.19185031 | 3.12095461  |
| 1  | -7.54686641 | -4.71906792 | 1.30279359  |

|   |             |             |             |
|---|-------------|-------------|-------------|
| 1 | -8.37510370 | -3.24250732 | -0.51545986 |
| 1 | -9.20638725 | -1.76828349 | -2.32671410 |
| 1 | 9.11532292  | 1.95932026  | 2.52267960  |
| 1 | 8.28647727  | 3.42914005  | 0.70492246  |
| 1 | 7.45773993  | 4.90553922  | -1.11322541 |
| 1 | 6.63316661  | 6.38318432  | -2.92472912 |

**IIIb-Cr**

|   |              |              |              |
|---|--------------|--------------|--------------|
| 6 | 1.106592540  | -0.221397520 | 0.889198650  |
| 6 | 1.313847130  | 0.853738690  | -0.013878310 |
| 6 | 0.266952470  | 1.273291970  | -0.892625890 |
| 6 | -0.992834180 | 0.619821690  | -0.873402280 |
| 6 | -1.213285270 | -0.463873590 | 0.036232890  |
| 6 | -0.161926810 | -0.884825500 | 0.919315910  |
| 6 | -0.385328150 | -1.957721530 | 1.835213020  |
| 6 | 2.132938540  | -0.633142520 | 1.771917000  |
| 6 | 2.570233510  | 1.515255150  | -0.040703540 |
| 6 | 0.484558610  | 2.351250800  | -1.791247540 |
| 6 | -2.038423060 | 1.038601620  | -1.729773290 |
| 6 | -2.482812070 | -1.117150980 | 0.074254840  |
| 6 | 1.908608700  | -1.708001120 | 2.688438440  |
| 6 | 3.392256710  | 0.029389500  | 1.745287380  |
| 6 | 2.787172390  | 2.593995270  | -0.946452660 |
| 6 | 3.610410540  | 1.099958010  | 0.838932610  |
| 6 | -0.560864530 | 2.771991750  | -2.662008300 |
| 6 | 1.747709920  | 3.010709730  | -1.818795590 |
| 6 | -1.660809700 | -2.617401140 | 1.870439670  |
| 6 | 0.660739900  | -2.369797950 | 2.722550690  |
| 6 | -2.705619760 | -2.198803190 | 0.992733820  |
| 6 | -3.533913660 | -0.688973160 | -0.799108960 |
| 6 | -3.309039580 | 0.382995510  | -1.691747710 |
| 6 | -1.820903840 | 2.118930260  | -2.630424030 |

|   |              |              |              |
|---|--------------|--------------|--------------|
| 6 | 2.949658640  | -2.115562710 | 3.574941950  |
| 6 | 4.432824000  | -0.383861340 | 2.630851540  |
| 6 | 4.873783470  | 1.764245700  | 0.810884500  |
| 6 | 4.050645390  | 3.255566590  | -0.973455440 |
| 6 | -3.984852730 | -2.849052740 | 1.037304610  |
| 6 | -4.798798360 | -1.339306570 | -0.744914940 |
| 6 | -4.357382560 | 0.813033010  | -2.558723780 |
| 6 | -2.870863640 | 2.543795810  | -3.499248490 |
| 6 | 2.721625990  | -3.181923890 | 4.487547640  |
| 6 | 4.208987380  | -1.454113740 | 3.541998700  |
| 6 | 5.090472850  | 2.838468060  | -0.095718180 |
| 6 | -4.198831510 | -3.904053140 | 1.957175000  |
| 6 | -5.019943970 | -2.414260830 | 0.170689670  |
| 6 | -5.620546790 | 0.161488240  | -2.515112030 |
| 6 | -4.134672240 | 1.890273870  | -3.461231160 |
| 6 | -5.841537640 | -0.910739820 | -1.609360420 |
| 6 | -1.887938950 | -3.689018620 | 2.798304770  |
| 6 | 0.423842130  | -3.431969250 | 3.639778630  |
| 6 | -3.153522220 | -4.322924100 | 2.835046010  |
| 6 | -0.846247100 | -4.086404730 | 3.674983320  |
| 6 | 3.776616990  | -3.589843560 | 5.377393950  |
| 6 | 1.461464900  | -3.837379810 | 4.521417800  |
| 6 | -5.482666330 | -4.549619170 | 1.997988380  |
| 6 | -6.299211380 | -3.062773140 | 0.216096360  |
| 6 | -7.120975120 | -1.570512050 | -1.559001390 |
| 6 | -7.319692140 | -2.616404790 | -0.661280590 |
| 6 | -6.491993140 | -4.121960380 | 1.135362710  |
| 6 | -5.189311650 | 2.319640480  | -4.334590850 |
| 6 | -6.673132480 | 0.598573480  | -3.393859360 |
| 6 | -7.939897740 | -0.082994390 | -3.322587800 |
| 6 | -6.438196770 | 1.652966760  | -4.273474350 |
| 6 | 3.511057850  | -4.672646020 | 6.289155040  |

|   |              |              |              |
|---|--------------|--------------|--------------|
| 6 | -8.152474140 | -1.110927960 | -2.452609160 |
| 1 | -8.740520260 | 0.246589900  | -3.991484100 |
| 6 | 1.225023830  | -4.915163800 | 5.447276440  |
| 6 | -1.073427300 | -5.156599810 | 4.603560760  |
| 6 | -3.375041320 | -5.394118720 | 3.767749060  |
| 6 | -5.669408530 | -5.622498360 | 2.940761590  |
| 6 | 4.266036410  | 4.331879460  | -1.878454700 |
| 6 | 1.964967680  | 4.091741660  | -2.723741400 |
| 6 | -0.341559720 | 3.855017930  | -3.565984790 |
| 6 | -2.649112480 | 3.621473320  | -4.399325120 |
| 6 | -4.942108170 | 3.393439870  | -5.223223980 |
| 6 | -3.710629130 | 4.045004130  | -5.273376320 |
| 6 | -1.387532780 | 4.274973130  | -4.433087390 |
| 6 | 0.920411030  | 4.510294990  | -3.595109710 |
| 6 | 5.543800420  | 4.994104370  | -1.901581990 |
| 6 | 3.226578030  | 4.748647940  | -2.750700060 |
| 6 | -4.671090580 | -6.022524340 | 3.779043600  |
| 6 | -0.018156970 | -5.542294360 | 5.468468610  |
| 6 | -2.341997920 | -5.784766070 | 4.619778670  |
| 6 | 2.301470700  | -5.300703190 | 6.322699670  |
| 1 | -7.242544920 | 1.980679910  | -4.940213990 |
| 1 | -5.746023200 | 3.720559790  | -5.890787490 |
| 6 | 5.004646740  | -2.933811340 | 5.330786700  |
| 6 | 5.255967280  | -1.867388850 | 4.432184220  |
| 6 | 5.690280200  | 0.278346310  | 2.599528630  |
| 6 | 5.910426990  | 1.349192400  | 1.691453150  |
| 6 | 6.361641280  | 3.505092170  | -0.124160780 |
| 6 | 6.550771930  | 4.572180800  | -1.036148360 |
| 6 | 7.377685530  | 3.071608450  | 0.760624150  |
| 6 | 7.181316780  | 2.021825550  | 1.656887700  |
| 6 | 6.735870600  | -0.142981630 | 3.493604130  |
| 6 | 6.499621850  | -1.193362440 | 4.379314670  |

|   |              |              |              |
|---|--------------|--------------|--------------|
| 6 | 7.996935480  | 0.548761100  | 3.433564520  |
| 6 | 8.208262440  | 1.575819830  | 2.561895360  |
| 6 | 5.727026540  | 6.078713380  | -2.830530300 |
| 6 | 3.439570040  | 5.837812440  | -3.667265940 |
| 6 | 1.140531820  | 5.598442400  | -4.505356130 |
| 6 | -1.159362820 | 5.365879750  | -5.342315890 |
| 6 | -3.450624850 | 5.138375380  | -6.173012810 |
| 6 | -2.239984470 | 5.764942580  | -6.205770960 |
| 6 | 2.406339920  | 6.233920340  | -4.513741210 |
| 6 | 0.084292300  | 5.995871230  | -5.359458560 |
| 6 | 4.728652620  | 6.479036990  | -3.668255970 |
| 1 | -2.067079590 | 6.593752530  | -6.898763610 |
| 1 | 0.252377400  | 6.825437750  | -6.054097430 |
| 1 | 2.574343370  | 7.063168480  | -5.208792490 |
| 1 | 4.892472350  | 7.306235970  | -4.365377310 |
| 1 | -4.256243570 | 5.460734560  | -6.839415580 |
| 1 | -4.841099640 | -6.840141140 | 4.485808970  |
| 1 | -2.515104460 | -6.602731230 | 5.326620800  |
| 1 | -0.190346430 | -6.360703850 | 6.175104130  |
| 1 | 2.125892020  | -6.120850830 | 7.025180400  |
| 1 | 8.793626170  | 0.228603340  | 4.111660750  |
| 1 | 7.299292650  | -1.509259560 | 5.057300750  |
| 1 | 5.803870090  | -3.249021580 | 6.009612150  |
| 1 | 4.312705420  | -4.985462940 | 6.964840560  |
| 1 | -6.644601300 | -6.117448930 | 2.971469230  |
| 1 | -7.467146610 | -4.618567890 | 1.168962150  |
| 1 | -8.295013230 | -3.112866040 | -0.628764380 |
| 1 | -9.124527390 | -1.611842410 | -2.418730470 |
| 1 | 9.175868510  | 2.085820880  | 2.535466620  |
| 1 | 8.347420000  | 3.579616890  | 0.738515890  |
| 1 | 7.520683670  | 5.079870290  | -1.058378030 |
| 1 | 6.698207900  | 6.582195420  | -2.850200090 |

|    |              |              |              |
|----|--------------|--------------|--------------|
| 24 | -0.862853010 | -2.728813350 | -0.293547660 |
| 6  | -0.020821600 | -4.332375780 | 0.024450610  |
| 6  | 0.367462820  | -2.421294080 | -1.627199970 |
| 6  | -1.900479590 | -3.599618870 | -1.537344310 |
| 8  | -2.566334080 | -4.147536000 | -2.319671720 |
| 8  | 1.147180780  | -2.217278320 | -2.467144940 |
| 8  | 0.510620770  | -5.346527340 | 0.235819830  |

**TS(III)-Cr**

|   |             |             |             |
|---|-------------|-------------|-------------|
| 6 | 1.08387010  | -0.24504669 | 0.99672190  |
| 6 | 1.29634161  | 0.82692234  | 0.07893163  |
| 6 | 0.25500786  | 1.22108091  | -0.81374566 |
| 6 | -1.01854045 | 0.57624842  | -0.76343519 |
| 6 | -1.24149138 | -0.47394277 | 0.18736162  |
| 6 | -0.18452167 | -0.89897870 | 1.05844502  |
| 6 | -0.40907058 | -1.95690446 | 1.98644542  |
| 6 | 2.12405780  | -0.64881696 | 1.87707314  |
| 6 | 2.55418971  | 1.47511489  | 0.02801515  |
| 6 | 0.46879053  | 2.27895650  | -1.73848233 |
| 6 | -2.06860745 | 0.97845521  | -1.63886668 |
| 6 | -2.48990960 | -1.17305298 | 0.19278544  |
| 6 | 1.89802875  | -1.70044331 | 2.80881229  |
| 6 | 3.38550137  | 0.00935390  | 1.82750263  |
| 6 | 2.77282573  | 2.53117721  | -0.90435009 |
| 6 | 3.60113826  | 1.06608268  | 0.90491507  |
| 6 | -0.58172133 | 2.68572043  | -2.60805010 |
| 6 | 1.73276087  | 2.93268191  | -1.78258812 |
| 6 | -1.67591873 | -2.60613828 | 2.03368929  |
| 6 | 0.63569717  | -2.35299537 | 2.86315783  |
| 6 | -2.70708291 | -2.22286481 | 1.13591139  |
| 6 | -3.53848509 | -0.75232121 | -0.68027892 |
| 6 | -3.33202198 | 0.32312368  | -1.58414306 |

6 -1.84640120 2.03728590 -2.55897091  
6 2.94448937 -2.10200658 3.69193885  
6 4.43050958 -0.39460891 2.71031922  
6 4.86643889 1.72134322 0.85388622  
6 4.03928201 3.18440354 -0.95288707  
6 -3.97169200 -2.87797001 1.17810977  
6 -4.80000429 -1.41287998 -0.63136725  
6 -4.37793900 0.73053273 -2.46083455  
6 -2.89745922 2.44654647 -3.43328527  
6 2.71956151 -3.15438907 4.62262649  
6 4.20751837 -1.44887438 3.63870644  
6 5.08229216 2.77862200 -0.07388356  
6 -4.19031694 -3.92811191 2.11368303  
6 -5.01126032 -2.47514101 0.29270071  
6 -5.63545231 0.06671783 -2.41630642  
6 -4.15941089 1.79320195 -3.38128434  
6 -5.84610736 -0.99940294 -1.50348818  
6 -1.89456793 -3.66197968 2.96422215  
6 0.41264459 -3.40826985 3.79766756  
6 -3.15520881 -4.32026388 3.00193536  
6 -0.85096228 -4.05867821 3.84613857  
6 3.77958936 -3.55432485 5.50880499  
6 1.45810574 -3.80536978 4.67543012  
6 -5.46805462 -4.58834174 2.15026633  
6 -6.28398036 -3.13637875 0.33991458  
6 -7.11709226 -1.67157411 -1.45217488  
6 -7.30530040 -2.71261406 -0.54499711  
6 -6.47302288 -4.18472368 1.27317736  
6 -5.21471525 2.20279287 -4.26413290  
6 -6.68827406 0.48393430 -3.30375630  
6 -7.94786395 -0.20914887 -3.23021853  
6 -6.45931292 1.53017480 -4.19591426

|   |             |             |             |
|---|-------------|-------------|-------------|
| 6 | 3.51910482  | -4.62289074 | 6.43745169  |
| 6 | -8.15156108 | -1.23177171 | -2.35144359 |
| 1 | -8.74983289 | 0.10550256  | -3.90459955 |
| 6 | 1.22779059  | -4.87066982 | 5.61424043  |
| 6 | -1.07300131 | -5.12295728 | 4.78361408  |
| 6 | -3.37002927 | -5.38527744 | 3.94515715  |
| 6 | -5.65387095 | -5.64960854 | 3.10495135  |
| 6 | 4.25481212  | 4.24127690  | -1.88111998 |
| 6 | 1.94908115  | 3.99457745  | -2.71010118 |
| 6 | -0.36351699 | 3.74910934  | -3.53414663 |
| 6 | -2.67561680 | 3.50625900  | -4.35466167 |
| 6 | -4.96939204 | 3.26142986  | -5.17112888 |
| 6 | -3.73839109 | 3.91341380  | -5.23444149 |
| 6 | -1.41299729 | 4.15517430  | -4.40477476 |
| 6 | 0.90139431  | 4.39883030  | -3.58306413 |
| 6 | 5.53519064  | 4.89634042  | -1.92465946 |
| 6 | 3.21279394  | 4.64588396  | -2.75605009 |
| 6 | -4.65815340 | -6.02788849 | 3.95638800  |
| 6 | -0.01683587 | -5.49854500 | 5.64789189  |
| 6 | -2.33876424 | -5.75813428 | 4.80565288  |
| 6 | 2.30801675  | -5.24767346 | 6.48759838  |
| 1 | -7.26397596 | 1.84233840  | -4.86958527 |
| 1 | -5.77342634 | 3.57442076  | -5.84523679 |
| 6 | 5.01125303  | -2.90408241 | 5.44245006  |
| 6 | 5.26050886  | -1.85383902 | 4.52708581  |
| 6 | 5.69167171  | 0.26125859  | 2.65872195  |
| 6 | 5.90925488  | 1.31492118  | 1.73274062  |
| 6 | 6.35645583  | 3.43694105  | -0.12412372 |
| 6 | 6.54539892  | 4.48543253  | -1.05698810 |
| 6 | 7.37760982  | 3.01342762  | 0.76083554  |
| 6 | 7.18365726  | 1.98056014  | 1.67614045  |
| 6 | 6.74234724  | -0.15171982 | 3.55110126  |



|   |             |             |             |
|---|-------------|-------------|-------------|
| 6 | 6.50757186  | -1.18691857 | 4.45411329  |
| 6 | 8.00633003  | 0.53243051  | 3.46984678  |
| 6 | 8.21571515  | 1.54411420  | 2.57992645  |
| 6 | 5.71820641  | 5.96166228  | -2.87548035 |
| 6 | 3.42517568  | 5.71564236  | -3.69481646 |
| 6 | 1.12073182  | 5.46842790  | -4.51575792 |
| 6 | -1.18512082 | 5.22713684  | -5.33636392 |
| 6 | -3.47943799 | 4.98908913  | -6.15511656 |
| 6 | -2.26757420 | 5.61251457  | -6.20344811 |
| 6 | 2.38842110  | 6.09887068  | -4.54360361 |
| 6 | 0.06077984  | 5.85219483  | -5.37147909 |
| 6 | 4.71692890  | 6.35067214  | -3.71537450 |
| 1 | -2.09489316 | 6.42719028  | -6.91298924 |
| 1 | 0.22766216  | 6.66719249  | -6.08346080 |
| 1 | 2.55564979  | 6.91330404  | -5.25606827 |
| 1 | 4.88101267  | 7.16316318  | -4.42947393 |
| 1 | -4.28610328 | 5.29977773  | -6.82572313 |
| 1 | -4.82383841 | -6.83867229 | 4.67201894  |
| 1 | -2.50787252 | -6.57011802 | 5.52038781  |
| 1 | -0.18492056 | -6.31041407 | 6.36306463  |
| 1 | 2.13525550  | -6.05822604 | 7.20181608  |
| 1 | 8.80701253  | 0.21891308  | 4.14632068  |
| 1 | 7.31069485  | -1.49713301 | 5.13059931  |
| 1 | 5.81402666  | -3.21392191 | 6.11960728  |
| 1 | 4.32506875  | -4.92838139 | 7.11129358  |
| 1 | -6.62417658 | -6.15422888 | 3.13286722  |
| 1 | -7.44362064 | -4.69044610 | 1.30600448  |
| 1 | -8.27491267 | -3.22008024 | -0.51002305 |
| 1 | -9.11809515 | -1.74306447 | -2.31530849 |
| 1 | 9.18572898  | 2.04835646  | 2.53707013  |
| 1 | 8.34978449  | 3.51568529  | 0.72160281  |
| 1 | 7.51800239  | 4.98693154  | -1.09528410 |

|    |             |             |             |
|----|-------------|-------------|-------------|
| 1  | 6.69169906  | 6.45975230  | -2.91072391 |
| 24 | -0.22851304 | -1.73981311 | -1.30125426 |
| 6  | -0.13000670 | -3.53746145 | -1.06068502 |
| 6  | 1.41389467  | -1.77625676 | -2.08520165 |
| 6  | -0.98701722 | -2.02714012 | -2.92640799 |
| 8  | -1.48768618 | -2.21209456 | -3.96643435 |
| 8  | 2.47000594  | -1.79393419 | -2.58488345 |
| 8  | -0.07904681 | -4.69425502 | -0.90019409 |

### TS'(III)-Cr

|   |             |             |             |
|---|-------------|-------------|-------------|
| 6 | 1.06359826  | -0.24646984 | 1.00344025  |
| 6 | 1.27623763  | 0.81410099  | 0.07817965  |
| 6 | 0.23845102  | 1.19928824  | -0.81739023 |
| 6 | -1.02625186 | 0.53912061  | -0.78183256 |
| 6 | -1.26461701 | -0.48586656 | 0.19027753  |
| 6 | -0.20115849 | -0.90507759 | 1.05606196  |
| 6 | -0.42302608 | -1.97549840 | 1.97350477  |
| 6 | 2.10206385  | -0.65312851 | 1.87974310  |
| 6 | 2.53551453  | 1.46571007  | 0.02983128  |
| 6 | 0.45374185  | 2.25202607  | -1.74511471 |
| 6 | -2.08188419 | 0.95028259  | -1.64678055 |
| 6 | -2.53065091 | -1.15536752 | 0.22215965  |
| 6 | 1.88140886  | -1.71714231 | 2.80252613  |
| 6 | 3.36365313  | 0.00488743  | 1.83260202  |
| 6 | 2.75485705  | 2.51747275  | -0.90442521 |
| 6 | 3.57963225  | 1.06206024  | 0.91040180  |
| 6 | -0.59362553 | 2.65183340  | -2.62500708 |
| 6 | 1.71573055  | 2.91126013  | -1.78764716 |
| 6 | -1.69877928 | -2.61361361 | 2.03878307  |
| 6 | 0.62509238  | -2.37658428 | 2.84944101  |
| 6 | -2.74068396 | -2.21910172 | 1.15333488  |
| 6 | -3.57574875 | -0.74143001 | -0.65580894 |

6 -3.35506085 0.31696288 -1.57700596  
6 -1.85853834 2.00574829 -2.57299446  
6 2.92937088 -2.12099157 3.68251517  
6 4.40955132 -0.40162446 2.71273457  
6 4.84501012 1.71830287 0.86066682  
6 4.02078802 3.17350657 -0.95170993  
6 -4.01011465 -2.86666399 1.20444712  
6 -4.84081775 -1.39285149 -0.59634964  
6 -4.40297105 0.72591067 -2.45111865  
6 -2.91123408 2.41876394 -3.44425212  
6 2.70839649 -3.18178723 4.60512053  
6 4.18948487 -1.46243106 3.63481276  
6 5.06169828 2.77320942 -0.06875267  
6 -4.22344531 -3.92090902 2.13555003  
6 -5.05369951 -2.45159146 0.33193586  
6 -5.66790259 0.07677812 -2.39201266  
6 -4.17861885 1.77690417 -3.38273410  
6 -5.88605094 -0.97894185 -1.46812646  
6 -1.91470063 -3.67211504 2.96285230  
6 0.40180233 -3.43465240 3.77998743  
6 -3.18052199 -4.32334663 3.00919707  
6 -0.86380902 -4.08056025 3.83273021  
6 3.77005115 -3.58435810 5.48884796  
6 1.44912193 -3.83564615 4.65474842  
6 -5.50534489 -4.57236540 2.18221101  
6 -6.33071639 -3.10593706 0.38675086  
6 -7.16169879 -1.63984910 -1.40571847  
6 -7.35367242 -2.67567222 -0.49181790  
6 -6.51687265 -4.15685732 1.31818818  
6 -5.23509718 2.18924932 -4.26345093  
6 -6.72065289 0.49554562 -3.27786130  
6 -7.98669167 -0.18363396 -3.19126387

6 -6.48539974 1.53051712 -4.18242813  
6 3.51296858 -4.66031435 6.40997606  
6 -8.19631054 -1.19707611 -2.30280264  
1 -8.78895818 0.13318152 -3.86428111  
6 1.22080837 -4.90590828 5.58856472  
6 -1.08403680 -5.14786490 4.76614344  
6 -3.39135299 -5.39250364 3.94775088  
6 -5.68676811 -5.63815237 3.13257494  
6 4.23706046 4.22570345 -1.88402057  
6 1.93415349 3.96811001 -2.72060508  
6 -0.37408480 3.71223716 -3.55343049  
6 -2.68655344 3.47285362 -4.37231422  
6 -4.98472618 3.23868383 -5.18009540  
6 -3.74986145 3.88109265 -5.25181323  
6 -1.42247950 4.11646650 -4.42721877  
6 0.88975742 4.36473469 -3.60078514  
6 5.51623733 4.88328814 -1.92661046  
6 3.19681904 4.62237907 -2.76511213  
6 -4.68324700 -6.02759636 3.96973822  
6 -0.02419986 -5.53202714 5.62282494  
6 -2.35318375 -5.77629821 4.79533873  
6 2.30310686 -5.28749606 6.45748255  
1 -7.29051302 1.84426500 -4.85482015  
1 -5.78909544 3.55312384 -5.85313218  
6 4.99861671 -2.92872948 5.42761953  
6 5.24374710 -1.87020449 4.51999747  
6 5.66980997 0.25627250 2.66379528  
6 5.88686764 1.31286625 1.74036508  
6 6.33571771 3.43318570 -0.11799959  
6 6.52501789 4.47842449 -1.05401271  
6 7.35520259 3.01267766 0.76988160  
6 7.16063856 1.97973069 1.68550010

|   |             |             |             |
|---|-------------|-------------|-------------|
| 6 | 6.72104798  | -0.15828911 | 3.55443402  |
| 6 | 6.48849066  | -1.19914435 | 4.45198376  |
| 6 | 7.98355948  | 0.52879822  | 3.47686395  |
| 6 | 8.19207178  | 1.54341415  | 2.58989458  |
| 6 | 5.70017851  | 5.94393567  | -2.88226755 |
| 6 | 3.41095299  | 5.68693158  | -3.70890552 |
| 6 | 1.11067474  | 5.42988109  | -4.53771488 |
| 6 | -1.19241279 | 5.18451674  | -5.36351192 |
| 6 | -3.48756636 | 4.94958208  | -6.17987669 |
| 6 | -2.27361529 | 5.56810887  | -6.23295005 |
| 6 | 2.37663013  | 6.06294646  | -4.56416340 |
| 6 | 0.05319847  | 5.80870606  | -5.39928056 |
| 6 | 4.70096722  | 6.32540968  | -3.72811737 |
| 1 | -2.09840722 | 6.37829028  | -6.94701253 |
| 1 | 0.22220736  | 6.62043251  | -6.11448036 |
| 1 | 2.54472512  | 6.87400566  | -5.28028431 |
| 1 | 4.86545200  | 7.13431202  | -4.44618132 |
| 1 | -4.29397303 | 5.25941026  | -6.85119164 |
| 1 | -4.84534499 | -6.84180847 | 4.68225337  |
| 1 | -2.52018378 | -6.59126397 | 5.50716897  |
| 1 | -0.19152766 | -6.34727257 | 6.33427495  |
| 1 | 2.13248452  | -6.10289787 | 7.16665913  |
| 1 | 8.78419212  | 0.21475306  | 4.15315315  |
| 1 | 7.29232595  | -1.51117704 | 5.12680399  |
| 1 | 5.80284084  | -3.24010307 | 6.10235366  |
| 1 | 4.32028881  | -4.96870652 | 7.08086534  |
| 1 | -6.65968492 | -6.13712189 | 3.16903469  |
| 1 | -7.49002904 | -4.65708599 | 1.35806148  |
| 1 | -8.32689923 | -3.17562200 | -0.45050207 |
| 1 | -9.16767415 | -1.69842557 | -2.25805729 |
| 1 | 9.16132855  | 2.04931510  | 2.54942056  |
| 1 | 8.32701425  | 3.51573240  | 0.73196621  |

|    |             |             |             |
|----|-------------|-------------|-------------|
| 1  | 7.49671844  | 4.98170078  | -1.09201765 |
| 1  | 6.67247520  | 6.44441229  | -2.91665104 |
| 24 | -0.60146079 | -2.19618876 | -1.03514414 |
| 6  | -0.54269636 | -4.00074763 | -0.81696789 |
| 6  | 1.04960009  | -2.25518989 | -1.78965871 |
| 6  | -1.32609485 | -2.43962700 | -2.68248309 |
| 8  | -1.79366443 | -2.58400424 | -3.74422116 |
| 8  | 2.11140942  | -2.27896205 | -2.27823650 |
| 8  | -0.50817266 | -5.15983166 | -0.67053216 |

### IM(IIIa-b)-Cr

|   |             |             |             |
|---|-------------|-------------|-------------|
| 6 | 1.01004720  | -0.30612631 | 0.97983116  |
| 6 | 1.22195316  | 0.76438653  | 0.06323468  |
| 6 | 0.18211777  | 1.15875177  | -0.82794269 |
| 6 | -1.08453615 | 0.50297194  | -0.79046185 |
| 6 | -1.31241841 | -0.54669420 | 0.16156836  |
| 6 | -0.25121779 | -0.97138046 | 1.02972683  |
| 6 | -0.48266406 | -2.02073605 | 1.96582886  |
| 6 | 2.04684348  | -0.70532395 | 1.86390144  |
| 6 | 2.47784882  | 1.41983398  | 0.01918336  |
| 6 | 0.39329477  | 2.22011423  | -1.74698153 |
| 6 | -2.14060700 | 0.91241906  | -1.65539120 |
| 6 | -2.57656127 | -1.22250671 | 0.19287335  |
| 6 | 1.82174202  | -1.76047284 | 2.79427938  |
| 6 | 3.30683868  | -0.04344065 | 1.81990531  |
| 6 | 2.69502669  | 2.47921285  | -0.90851398 |
| 6 | 3.52275798  | 1.01481135  | 0.89907598  |
| 6 | -0.65732105 | 2.62547498  | -2.61964869 |
| 6 | 1.65492693  | 2.87910950  | -1.78751702 |
| 6 | -1.75592201 | -2.65836852 | 2.02895484  |
| 6 | 0.56076583  | -2.41423580 | 2.84751445  |
| 6 | -2.79328509 | -2.26915585 | 1.13905128  |

6 -3.62526164 -0.79732950 -0.67730915  
6 -3.41240765 0.27218135 -1.58850552  
6 -1.92090417 1.97638394 -2.57235752  
6 2.86664601 -2.15848840 3.68065513  
6 4.35061137 -0.44558403 2.70492104  
6 4.78623639 1.67466575 0.85325839  
6 3.95941008 3.13745905 -0.95242957  
6 -4.06449427 -2.91047728 1.19504020  
6 -4.89324854 -1.44418415 -0.61419234  
6 -4.46111083 0.68653067 -2.45676619  
6 -2.97528113 2.39192600 -3.43980853  
6 2.64105501 -3.21005095 4.61258889  
6 4.12804989 -1.50187254 3.63126545  
6 5.00144243 2.73394220 -0.07181965  
6 -4.28393853 -3.95624192 2.13483567  
6 -5.10699003 -2.49948221 0.31708519  
6 -5.72518761 0.03459627 -2.40068108  
6 -4.24052609 1.74578178 -3.38123681  
6 -5.94055899 -1.02519543 -1.48169763  
6 -1.97788622 -3.70699544 2.96514615  
6 0.33437369 -3.46374423 3.78777066  
6 -3.24448854 -4.35449725 3.01516931  
6 -0.93202872 -4.10789612 3.84309586  
6 3.70015868 -3.60780011 5.50117896  
6 1.37959123 -3.85981537 4.66674984  
6 -5.56728186 -4.60421449 2.18376740  
6 -6.38569894 -3.14949369 0.37599712  
6 -7.21718295 -1.68501553 -1.41789604  
6 -7.40877010 -2.71982857 -0.50382306  
6 -6.57603018 -4.19322142 1.31395539  
6 -5.29856888 2.16165410 -4.25761422  
6 -6.77986871 0.45781164 -3.28245580

|   |             |             |             |
|---|-------------|-------------|-------------|
| 6 | -8.04526618 | -0.22332361 | -3.19752760 |
| 6 | -6.54781367 | 1.49902030  | -4.18011608 |
| 6 | 3.43930063  | -4.67496658 | 6.43136626  |
| 6 | -8.25318511 | -1.23990939 | -2.31255974 |
| 1 | -8.84861442 | 0.09574162  | -3.86818342 |
| 6 | 1.14748726  | -4.92140617 | 5.60955954  |
| 6 | -1.15666676 | -5.16654961 | 4.78608510  |
| 6 | -3.46093929 | -5.41436321 | 3.96323036  |
| 6 | -5.75419030 | -5.66141824 | 3.14252414  |
| 6 | 4.17340524  | 4.19649944  | -1.87807819 |
| 6 | 1.86991048  | 3.94318994  | -2.71262802 |
| 6 | -0.44054155 | 3.69252792  | -3.54178556 |
| 6 | -2.75381830 | 3.45328778  | -4.35985419 |
| 6 | -5.05189345 | 3.21841991  | -5.16680326 |
| 6 | -3.81868258 | 3.86506123  | -5.23522616 |
| 6 | -1.49086372 | 4.10036402  | -4.41114411 |
| 6 | 0.82274060  | 4.34572841  | -3.58711757 |
| 6 | 5.45165224  | 4.85601321  | -1.91761155 |
| 6 | 3.13172995  | 4.59871939  | -2.75487940 |
| 6 | -4.75435420 | -6.04595421 | 3.98650674  |
| 6 | -0.09910404 | -5.54442698 | 5.64805117  |
| 6 | -2.42648916 | -5.79281665 | 4.81789167  |
| 6 | 2.22769643  | -5.29841143 | 6.48297387  |
| 1 | -7.35427556 | 1.81592781  | -4.84936399 |
| 1 | -5.85777402 | 3.53548505  | -5.83678681 |
| 6 | 4.93072832  | -2.95582996 | 5.43651179  |
| 6 | 5.17987680  | -1.90454598 | 4.52200929  |
| 6 | 5.61019223  | 0.21394616  | 2.65787950  |
| 6 | 5.82750029  | 1.27013712  | 1.73435061  |
| 6 | 6.27377775  | 3.39674332  | -0.11750260 |
| 6 | 6.46143648  | 4.44728809  | -1.04810592 |
| 6 | 7.29366453  | 2.97494191  | 0.76950857  |



|   |             |             |             |
|---|-------------|-------------|-------------|
| 6 | 7.10007057  | 1.93970967  | 1.68251337  |
| 6 | 6.65967683  | -0.19728871 | 3.55221868  |
| 6 | 6.42524601  | -1.23451023 | 4.45320600  |
| 6 | 7.92188570  | 0.49058431  | 3.47575662  |
| 6 | 8.13083117  | 1.50462673  | 2.58834421  |
| 6 | 5.63320453  | 5.92323820  | -2.86649442 |
| 6 | 3.34290412  | 5.67047594  | -3.69141438 |
| 6 | 1.04083793  | 5.41776358  | -4.51705610 |
| 6 | -1.26396883 | 5.17506699  | -5.34027579 |
| 6 | -3.55973754 | 4.94101143  | -6.15562769 |
| 6 | -2.34710959 | 5.56263404  | -6.20556154 |
| 6 | 2.30651715  | 6.05188355  | -4.54169645 |
| 6 | -0.01894918 | 5.80125081  | -5.37347576 |
| 6 | 4.63249106  | 6.30990281  | -3.70822407 |
| 1 | -2.17456192 | 6.37823748  | -6.91406763 |
| 1 | 0.14760331  | 6.61821260  | -6.08330180 |
| 1 | 2.47252463  | 6.86815438  | -5.25235379 |
| 1 | 4.79537763  | 7.12396168  | -4.42081145 |
| 1 | -4.36744014 | 5.25399334  | -6.82391094 |
| 1 | -4.92100768 | -6.85340257 | 4.70567591  |
| 1 | -2.59714615 | -6.60085282 | 5.53668001  |
| 1 | -0.26889969 | -6.35277039 | 6.36680056  |
| 1 | 2.05403950  | -6.10712755 | 7.19904936  |
| 1 | 8.72154541  | 0.17814725  | 4.15393887  |
| 1 | 7.22726948  | -1.54337140 | 5.13163011  |
| 1 | 5.73249791  | -3.26532557 | 6.11670444  |
| 1 | 4.24508071  | -4.97954862 | 7.10585652  |
| 1 | -6.72845655 | -6.15769502 | 3.18014362  |
| 1 | -7.55072593 | -4.69030091 | 1.35620104  |
| 1 | -8.38280825 | -3.21806627 | -0.46007098 |
| 1 | -9.22432122 | -1.74170350 | -2.26784099 |
| 1 | 9.09948718  | 2.01177794  | 2.54924684  |

|    |             |             |             |
|----|-------------|-------------|-------------|
| 1  | 8.26443754  | 3.48017827  | 0.73407324  |
| 1  | 7.43232691  | 4.95231164  | -1.08334914 |
| 1  | 6.60501211  | 6.42480561  | -2.89881496 |
| 24 | -0.60339147 | -1.96376574 | -1.31081338 |
| 6  | -0.50586384 | -3.76218796 | -1.05845114 |
| 6  | 1.03573007  | -2.00032065 | -2.10111002 |
| 6  | -1.37541076 | -2.24919860 | -2.93251546 |
| 8  | -1.88069359 | -2.42701570 | -3.97129361 |
| 8  | 2.09047448  | -2.01600096 | -2.60398137 |
| 8  | -0.44869881 | -4.91687911 | -0.88702858 |

**Ild-Cr**

|   |              |              |              |
|---|--------------|--------------|--------------|
| 6 | 0.807172610  | -0.497209910 | 1.040878330  |
| 6 | 1.005027240  | 0.563221010  | 0.109323430  |
| 6 | -0.057932240 | 0.961460720  | -0.751039790 |
| 6 | -1.315775610 | 0.296960360  | -0.683643550 |
| 6 | -1.510645690 | -0.766569950 | 0.242317860  |
| 6 | -0.449448970 | -1.162564830 | 1.105316790  |
| 6 | -0.646730420 | -2.221570020 | 2.033568620  |
| 6 | 1.863096270  | -0.888186280 | 1.908096120  |
| 6 | 2.260386280  | 1.225427310  | 0.041435550  |
| 6 | 0.133844820  | 2.026720050  | -1.672617900 |
| 6 | -2.378189550 | 0.697347020  | -1.539036340 |
| 6 | -2.765820000 | -1.430774490 | 0.308106240  |
| 6 | 1.663722080  | -1.946237730 | 2.839862190  |
| 6 | 3.119542330  | -0.218236090 | 1.847368640  |
| 6 | 2.450296800  | 2.280436260  | -0.893379840 |
| 6 | 3.320838960  | 0.833731520  | 0.915973380  |
| 6 | -0.933267490 | 2.430895440  | -2.525891750 |
| 6 | 1.392300370  | 2.689237330  | -1.740289180 |
| 6 | -1.903768790 | -2.888240480 | 2.096773650  |
| 6 | 0.411828280  | -2.613285760 | 2.900843460  |
| 6 | -2.960999930 | -2.494020780 | 1.235526800  |

|   |              |              |              |
|---|--------------|--------------|--------------|
| 6 | -3.828101910 | -1.031680790 | -0.551867020 |
| 6 | -3.634997210 | 0.031454050  | -1.472716790 |
| 6 | -2.185478610 | 1.766665380  | -2.460288800 |
| 6 | 2.722452470  | -2.335828580 | 3.714751560  |
| 6 | 4.175557570  | -0.605723050 | 2.727066540  |
| 6 | 4.580267930  | 1.497473520  | 0.863100170  |
| 6 | 3.716008540  | 2.952503870  | -0.958243010 |
| 6 | -4.220845480 | -3.161433610 | 1.299818140  |
| 6 | -5.087874560 | -1.699577810 | -0.485956970 |
| 6 | -4.701590850 | 0.434054380  | -2.331646970 |
| 6 | -3.254394650 | 2.170191890  | -3.316500800 |
| 6 | 2.521388810  | -3.394174460 | 4.643537950  |
| 6 | 3.973968000  | -1.663645040 | 3.657461890  |
| 6 | 4.783504910  | 2.560675620  | -0.076396040 |
| 6 | -4.413551320 | -4.223071610 | 2.226936740  |
| 6 | -5.280293330 | -2.763121470 | 0.438458120  |
| 6 | -5.955597220 | -0.233764760 | -2.264877070 |
| 6 | -4.508291870 | 1.502186240  | -3.250647220 |
| 6 | -6.148117790 | -1.298194120 | -1.344997740 |
| 6 | -2.100576530 | -3.951793570 | 3.027860290  |
| 6 | 0.212795570  | -3.675850060 | 3.833496770  |
| 6 | -3.356592400 | -4.616922390 | 3.088578060  |
| 6 | -1.041780240 | -4.342801920 | 3.893170150  |
| 6 | 3.592539200  | -3.780631560 | 5.522981560  |
| 6 | 1.270411040  | -4.063481050 | 4.701724880  |
| 6 | -5.686147140 | -4.892406190 | 2.285405420  |
| 6 | -6.547563920 | -3.435186020 | 0.503509920  |
| 6 | -7.414894980 | -1.976501560 | -1.274071170 |
| 6 | -7.585348790 | -3.017798790 | -0.363440980 |
| 6 | -6.712467870 | -4.489902130 | 1.433332160  |
| 6 | -5.582268600 | 1.907492320  | -4.113266960 |
| 6 | -7.026212040 | 0.176948970  | -3.134087620 |
| 6 | -8.281179460 | -0.521681900 | -3.040634920 |

|   |              |              |              |
|---|--------------|--------------|--------------|
| 6 | -6.819381670 | 1.225574610  | -4.028373500 |
| 6 | 3.355340070  | -4.857244860 | 6.448567750  |
| 6 | -8.465624720 | -1.544128540 | -2.157756530 |
| 1 | -9.095219780 | -0.210452720 | -3.702081580 |
| 6 | 1.063302840  | -5.135387910 | 5.638585850  |
| 6 | -1.240798860 | -5.412502960 | 4.830381700  |
| 6 | -3.547598730 | -5.689236240 | 4.029237380  |
| 6 | -5.845923190 | -5.962425880 | 3.235003110  |
| 6 | 3.905921570  | 4.028206400  | -1.884726950 |
| 6 | 1.580964230  | 3.769132520  | -2.663590590 |
| 6 | -0.743335420 | 3.505537610  | -3.446651370 |
| 6 | -3.061980000 | 3.240292220  | -4.233193990 |
| 6 | -5.364264320 | 2.975063900  | -5.016871490 |
| 6 | -4.143382490 | 3.641583730  | -5.093462730 |
| 6 | -1.810208430 | 3.906913230  | -4.297115300 |
| 6 | 0.510677280  | 4.173034780  | -3.511164590 |
| 6 | 5.185328760  | 4.695759830  | -1.959671600 |
| 6 | 2.828067850  | 4.433756420  | -2.737763770 |
| 6 | -4.830846070 | -6.340626110 | 4.062807220  |
| 6 | -0.171839860 | -5.779632860 | 5.681747470  |
| 6 | -2.499290580 | -6.059579530 | 4.868975920  |
| 6 | 2.154691530  | -5.500679920 | 6.503035920  |
| 1 | -7.637578320 | 1.534531900  | -4.687188900 |
| 1 | -6.183366780 | 3.284231430  | -5.674477910 |
| 6 | 4.811768360  | -3.109545280 | 5.454511580  |
| 6 | 5.036476730  | -2.052388830 | 4.540950150  |
| 6 | 5.425572850  | 0.067819290  | 2.673663850  |
| 6 | 5.625791270  | 1.122700920  | 1.742537530  |
| 6 | 6.049896740  | 3.245994410  | -0.118648850 |
| 6 | 6.242440460  | 4.253933860  | -1.123965240 |
| 6 | 7.080522070  | 2.833140740  | 0.765378610  |
| 6 | 6.892791080  | 1.809223380  | 1.686102380  |
| 6 | 6.484527320  | -0.324879570 | 3.563956500  |

|   |              |              |              |
|---|--------------|--------------|--------------|
| 6 | 6.270968400  | -1.363712600 | 4.466787410  |
| 6 | 7.737286260  | 0.380113720  | 3.482246320  |
| 6 | 7.931251520  | 1.392987060  | 2.591573380  |
| 6 | 5.340414990  | 5.762307390  | -2.921472710 |
| 6 | 3.014551360  | 5.515637190  | -3.658791440 |
| 6 | 0.699801990  | 5.254983030  | -4.435095250 |
| 6 | -1.612310340 | 4.991798800  | -5.222264110 |
| 6 | -3.914269480 | 4.729018440  | -6.008690330 |
| 6 | -2.713134680 | 5.370204360  | -6.069676390 |
| 6 | 1.957435710  | 5.901006600  | -4.480818720 |
| 6 | -0.378401240 | 5.635034560  | -5.270856370 |
| 6 | 4.306890760  | 6.156991780  | -3.712276810 |
| 1 | -2.562251150 | 6.193998990  | -6.773621050 |
| 1 | -0.232341180 | 6.459043080  | -5.976768780 |
| 1 | 2.103660310  | 6.722790860  | -5.189100940 |
| 1 | 4.446224930  | 6.972081700  | -4.428132980 |
| 1 | -4.736198320 | 5.033830770  | -6.663356300 |
| 1 | -4.976395070 | -7.156704780 | 4.776861840  |
| 1 | -2.650182030 | -6.875766950 | 5.583128810  |
| 1 | -0.323593420 | -6.595210300 | 6.396429180  |
| 1 | 1.997938940  | -6.316547270 | 7.214974720  |
| 1 | 8.542748100  | 0.079759970  | 4.158937350  |
| 1 | 7.080909110  | -1.659727220 | 5.141447950  |
| 1 | 5.623436150  | -3.406577710 | 6.126663520  |
| 1 | 4.170232400  | -5.152213000 | 7.116355640  |
| 1 | -6.812827730 | -6.472515250 | 3.279250830  |
| 1 | -7.678751900 | -5.002602360 | 1.482261080  |
| 1 | -8.551535740 | -3.530603920 | -0.313865160 |
| 1 | -9.428929480 | -2.060175360 | -2.104937050 |
| 1 | 8.893111580  | 1.912027320  | 2.545933480  |
| 1 | 8.047093950  | 3.344194350  | 0.717045980  |
| 1 | 7.220034550  | 4.737514360  | -1.204329540 |
| 1 | 6.316625840  | 6.249727120  | -2.994551010 |

|    |             |              |              |
|----|-------------|--------------|--------------|
| 24 | 5.599338930 | 2.478983490  | -2.277026510 |
| 6  | 5.312100720 | 0.648750520  | -2.344816440 |
| 6  | 7.358744470 | 2.179960830  | -2.706224220 |
| 6  | 5.261292220 | 2.555807620  | -4.081999700 |
| 8  | 5.050417620 | 2.625224830  | -5.224902590 |
| 8  | 8.479734620 | 2.004751370  | -2.973402040 |
| 8  | 5.137444730 | -0.499733580 | -2.380236740 |

**TS(IIIId-e)-Cr**

|   |             |             |             |
|---|-------------|-------------|-------------|
| 6 | 0.71771760  | -0.55910751 | 1.14099695  |
| 6 | 0.92976186  | 0.49595627  | 0.20943965  |
| 6 | -0.12162563 | 0.89746411  | -0.66283862 |
| 6 | -1.38425530 | 0.24430211  | -0.60209549 |
| 6 | -1.59672771 | -0.81003793 | 0.33093557  |
| 6 | -0.54569894 | -1.21173504 | 1.20213691  |
| 6 | -0.75716076 | -2.26597426 | 2.13285998  |
| 6 | 1.76882181  | -0.96234666 | 2.00966067  |
| 6 | 2.19146805  | 1.14771728  | 0.15016298  |
| 6 | 0.09023721  | 1.95050784  | -1.59634284 |
| 6 | -2.43488208 | 0.64385923  | -1.47386390 |
| 6 | -2.85850824 | -1.46264033 | 0.39170805  |
| 6 | 1.55646549  | -2.01907735 | 2.94053087  |
| 6 | 3.03267204  | -0.31109287 | 1.94661396  |
| 6 | 2.40267437  | 2.20505286  | -0.78192954 |
| 6 | 3.24320375  | 0.74426827  | 1.01874533  |
| 6 | -0.96195100 | 2.34915460  | -2.46957494 |
| 6 | 1.35298363  | 2.60459209  | -1.65657462 |
| 6 | -2.02087124 | -2.91847275 | 2.19344969  |
| 6 | 0.29570612  | -2.66902057 | 3.00247269  |
| 6 | -3.06984520 | -2.51739408 | 1.32444956  |
| 6 | -3.90966417 | -1.06144204 | -0.48077908 |
| 6 | -3.69810566 | -0.01019395 | -1.41194430 |

6 -2.22248983 1.69713934 -2.40787224  
6 2.61212286 -2.42544173 3.80992216  
6 4.08839289 -0.72053974 2.81527031  
6 4.51202475 1.39572330 0.95521927  
6 3.66475437 2.85765274 -0.83664038  
6 -4.33642473 -3.17213083 1.38491937  
6 -5.17567916 -1.71698027 -0.41932989  
6 -4.75182353 0.39093500 -2.28668426  
6 -3.27737448 2.09745342 -3.28190697  
6 2.39799936 -3.48172071 4.73911535  
6 3.87526190 -1.77570498 3.74411063  
6 4.72226929 2.45267385 0.02958946  
6 -4.54498733 -4.22622821 2.31745996  
6 -5.38559684 -2.77008483 0.51325667  
6 -6.01334582 -0.26418548 -2.22325939  
6 -4.53857082 1.44342695 -3.21892899  
6 -6.22456440 -1.31480347 -1.29247897  
6 -2.23244975 -3.97665356 3.12747528  
6 0.08317571 -3.72782100 3.93540758  
6 -3.49614748 -4.62727510 3.18599000  
6 -1.18014899 -4.37815021 3.99567592  
6 3.46785854 -3.88734429 5.61187589  
6 1.13728159 -4.13030003 4.80202703  
6 -5.82447941 -4.88194816 2.37284943  
6 -6.65983490 -3.42953281 0.57439346  
6 -7.49853250 -1.98034841 -1.22514933  
6 -7.68660692 -3.01014867 -0.30491558  
6 -6.84168018 -4.47472683 1.51126551  
6 -5.59978645 1.84639019 -4.09901091  
6 -7.07118963 0.14535055 -3.10837178  
6 -8.33396099 -0.53899262 -3.01736989  
6 -6.84463659 1.17883381 -4.01585489

|   |             |             |             |
|---|-------------|-------------|-------------|
| 6 | 3.21629768  | -4.95864717 | 6.53954019  |
| 6 | -8.53686937 | -1.54827762 | -2.12317630 |
| 1 | -9.13876002 | -0.22828305 | -3.69024893 |
| 6 | 0.91602621  | -5.19903148 | 5.74004029  |
| 6 | -1.39340618 | -5.44364020 | 4.93476396  |
| 6 | -3.70235982 | -5.69344346 | 4.12993807  |
| 6 | -6.00054715 | -5.94433003 | 3.32781635  |
| 6 | 3.86985248  | 3.91875387  | -1.77549379 |
| 6 | 1.56272809  | 3.65761476  | -2.59631892 |
| 6 | -0.75096412 | 3.40528271  | -3.40589382 |
| 6 | -3.06382365 | 3.15095939  | -4.21432269 |
| 6 | -5.36116753 | 2.89657748  | -5.01741793 |
| 6 | -4.13221130 | 3.54891650  | -5.09269937 |
| 6 | -1.80557094 | 3.80307450  | -4.27600425 |
| 6 | 0.51019856  | 4.05780206  | -3.46649323 |
| 6 | 5.13487198  | 4.61862643  | -1.79136791 |
| 6 | 2.82450629  | 4.31283448  | -2.65640197 |
| 6 | -4.99304575 | -6.32960047 | 4.16198264  |
| 6 | -0.32851428 | -5.82441799 | 5.78615241  |
| 6 | -2.65995993 | -6.07395056 | 4.97350953  |
| 6 | 2.00467006  | -5.58116612 | 6.60051938  |
| 1 | -7.65310882 | 1.48623071  | -4.68725236 |
| 1 | -6.17005500 | 3.20337062  | -5.68859389 |
| 6 | 4.69972598  | -3.24040473 | 5.53305907  |
| 6 | 4.93877299  | -2.18799627 | 4.61705989  |
| 6 | 5.35301225  | -0.07271268 | 2.74652196  |
| 6 | 5.56482857  | 0.97989736  | 1.81891316  |
| 6 | 6.00814947  | 3.09498235  | -0.04240640 |
| 6 | 6.20494671  | 4.17100893  | -0.97044448 |
| 6 | 7.03458885  | 2.66406093  | 0.82204447  |
| 6 | 6.84255948  | 1.63205100  | 1.74252185  |
| 6 | 6.41420388  | -0.49293775 | 3.62161956  |



|   |             |             |             |
|---|-------------|-------------|-------------|
| 6 | 6.18693605  | -1.52816483 | 4.52790300  |
| 6 | 7.68114726  | 0.17980143  | 3.52187348  |
| 6 | 7.88545230  | 1.18983447  | 2.62774275  |
| 6 | 5.32635071  | 5.64466573  | -2.79197874 |
| 6 | 3.02300140  | 5.38745009  | -3.59532017 |
| 6 | 0.71920389  | 5.12550071  | -4.40585141 |
| 6 | -1.58612551 | 4.86953527  | -5.21667753 |
| 6 | -3.88177349 | 4.61741281  | -6.02349210 |
| 6 | -2.67267167 | 5.24478254  | -6.08246461 |
| 6 | 1.97932363  | 5.76377692  | -4.44177198 |
| 6 | -0.34462793 | 5.50047841  | -5.26059941 |
| 6 | 4.30675572  | 6.01859346  | -3.63417505 |
| 1 | -2.50549053 | 6.05460236  | -6.79879736 |
| 1 | -0.18304007 | 6.31198284  | -5.97752108 |
| 1 | 2.14112304  | 6.57614187  | -5.15739511 |
| 1 | 4.47449052  | 6.81311720  | -4.36706730 |
| 1 | -4.69310411 | 4.91980495  | -6.69230073 |
| 1 | -5.15086546 | -7.14038037 | 4.87943807  |
| 1 | -2.82245245 | -6.88629779 | 5.68947701  |
| 1 | -0.49106133 | -6.63710984 | 6.50172174  |
| 1 | 1.83754523  | -6.39361879 | 7.31397090  |
| 1 | 8.49015240  | -0.14107274 | 4.18482765  |
| 1 | 6.99871203  | -1.84373222 | 5.19147790  |
| 1 | 5.51091791  | -3.55411243 | 6.19821419  |
| 1 | 4.02912446  | -5.26765251 | 7.20347911  |
| 1 | -6.97317622 | -6.44350330 | 3.37065885  |
| 1 | -7.81329729 | -4.97748373 | 1.55757015  |
| 1 | -8.65807874 | -3.51317246 | -0.25836250 |
| 1 | -9.50582541 | -2.05386910 | -2.07284335 |
| 1 | 8.85914224  | 1.68449591  | 2.56653890  |
| 1 | 8.01302035  | 3.15098268  | 0.76259643  |
| 1 | 7.12647195  | 4.75712009  | -0.92065873 |

|    |            |            |             |
|----|------------|------------|-------------|
| 1  | 6.29195968 | 6.15765650 | -2.83298068 |
| 24 | 6.04107383 | 3.09496867 | -3.02720593 |
| 6  | 5.89211302 | 1.27821816 | -3.10313817 |
| 6  | 7.84222092 | 2.88418430 | -3.00704938 |
| 6  | 6.12519982 | 3.19582366 | -4.84837772 |
| 8  | 6.19728024 | 3.30386690 | -6.00922905 |
| 8  | 9.00213943 | 2.74068124 | -2.97661960 |
| 8  | 5.79826926 | 0.11496145 | -3.12910561 |

### **Ile-Cr**

|   |             |             |             |
|---|-------------|-------------|-------------|
| 6 | 0.99646293  | -0.31448296 | 0.98967460  |
| 6 | 1.21756019  | 0.73707182  | 0.05484123  |
| 6 | 0.17329459  | 1.13941358  | -0.82253046 |
| 6 | -1.09346458 | 0.49079909  | -0.76610962 |
| 6 | -1.31326203 | -0.56239521 | 0.16556356  |
| 6 | -0.26817380 | -0.96511742 | 1.04351462  |
| 6 | -0.48857896 | -2.01647565 | 1.97584414  |
| 6 | 2.03823600  | -0.71391333 | 1.87088526  |
| 6 | 2.48258123  | 1.38734755  | 0.00114575  |
| 6 | 0.39284140  | 2.19241909  | -1.75473099 |
| 6 | -2.13985164 | 0.89595178  | -1.63919799 |
| 6 | -2.57774518 | -1.21137045 | 0.22089625  |
| 6 | 1.81658535  | -1.76530593 | 2.80446695  |
| 6 | 3.30249415  | -0.05970202 | 1.82040384  |
| 6 | 2.70455873  | 2.43606695  | -0.93481702 |
| 6 | 3.52413086  | 0.98865945  | 0.88772451  |
| 6 | -0.65803912 | 2.59981983  | -2.62626400 |
| 6 | 1.65942688  | 2.83867966  | -1.81309492 |
| 6 | -1.75428726 | -2.66723200 | 2.02895532  |
| 6 | 0.55541140  | -2.41656192 | 2.85594993  |
| 6 | -2.79680425 | -2.26545357 | 1.15324775  |
| 6 | -3.62365192 | -0.80608625 | -0.65453971 |

6 -3.40544319 0.24698596 -1.58234358  
6 -1.92151356 1.95301388 -2.56864518  
6 2.86211596 -2.16457898 3.68995629  
6 4.34528594 -0.45756391 2.70828997  
6 4.78931642 1.64489257 0.84186543  
6 3.97692422 3.08232011 -0.98236165  
6 -4.06529795 -2.91674379 1.20748443  
6 -4.89263123 -1.45755637 -0.59865308  
6 -4.45596439 0.65541106 -2.45768384  
6 -2.97329339 2.36215269 -3.44065013  
6 2.63899730 -3.21692282 4.62130556  
6 4.12285911 -1.50948190 3.64005037  
6 5.00992045 2.69462875 -0.09396100  
6 -4.28162189 -3.96991956 2.13946615  
6 -5.10942071 -2.51132738 0.33120393  
6 -5.71988302 0.00438697 -2.40017942  
6 -4.23745246 1.71187215 -3.38358485  
6 -5.93723858 -1.04967325 -1.47364792  
6 -1.97431050 -3.72265793 2.96376839  
6 0.33391433 -3.47185626 3.79144229  
6 -3.23956255 -4.37156416 3.01469995  
6 -0.92957484 -4.12231187 3.84196441  
6 3.69706389 -3.61411710 5.51029721  
6 1.37852424 -3.86916722 4.67129158  
6 -5.56353394 -4.62279452 2.18787589  
6 -6.38612901 -3.16700297 0.38625744  
6 -7.21321860 -1.71077272 -1.41260182  
6 -7.40774309 -2.74317934 -0.49538199  
6 -6.57486190 -4.21322541 1.32184837  
6 -5.29538449 2.12323587 -4.26263480  
6 -6.77376628 0.42109048 -3.28520278  
6 -8.03857833 -0.25952633 -3.20122075

6 -6.54150000 1.45976522 -4.18692440  
6 3.43777858 -4.68258513 6.43829314  
6 -8.24726328 -1.27231946 -2.31187096  
1 -8.84049941 0.05661982 -3.87501020  
6 1.14894904 -4.93378184 5.61086336  
6 -1.15145766 -5.18466391 4.78276489  
6 -3.45389781 -5.43595349 3.95969936  
6 -5.74716331 -5.68458347 3.14257689  
6 4.19861369 4.13946757 -1.92132470  
6 1.87114527 3.89334959 -2.75194273  
6 -0.44304750 3.66044945 -3.55490204  
6 -2.75468307 3.42127041 -4.36576974  
6 -5.05111625 3.18006302 -5.17436878  
6 -3.82147434 3.82847586 -5.24281918  
6 -1.49467424 4.06846728 -4.42148919  
6 0.82399771 4.30688304 -3.61160392  
6 5.48387224 4.80075845 -1.95756181  
6 3.14383168 4.54559574 -2.80774145  
6 -4.74592499 -6.07050908 3.98349243  
6 -0.09594725 -5.56148994 5.64561081  
6 -2.41926204 -5.81501791 4.81197356  
6 2.22747045 -5.30958299 6.48593013  
1 -7.34753633 1.77334790 -4.85840392  
1 -5.85798780 3.49353679 -5.84491553  
6 4.92740315 -2.95973930 5.44753726  
6 5.17353239 -1.91056589 4.53246212  
6 5.60632637 0.20020990 2.65958397  
6 5.82661070 1.24819901 1.73074507  
6 6.28823389 3.35861798 -0.13652486  
6 6.49288456 4.38774362 -1.06983666  
6 7.30351922 2.94240206 0.76318627  
6 7.10267449 1.91721831 1.67968258

|   |             |             |             |
|---|-------------|-------------|-------------|
| 6 | 6.65407819  | -0.20712241 | 3.55924753  |
| 6 | 6.41945568  | -1.23926277 | 4.46299062  |
| 6 | 7.91763853  | 0.47948262  | 3.48379935  |
| 6 | 8.13056253  | 1.48755391  | 2.59224396  |
| 6 | 5.69980207  | 5.79969438  | -2.97652617 |
| 6 | 3.35057839  | 5.62195958  | -3.75064103 |
| 6 | 1.03830712  | 5.38038367  | -4.54898643 |
| 6 | -1.27037818 | 5.14223054  | -5.35699247 |
| 6 | -3.56676334 | 4.90329539  | -6.16672524 |
| 6 | -2.35651920 | 5.52685855  | -6.22086864 |
| 6 | 2.29571561  | 6.00378216  | -4.59801453 |
| 6 | -0.02948606 | 5.76643255  | -5.39999523 |
| 6 | 4.67226736  | 6.19472087  | -3.84080320 |
| 1 | -2.18576037 | 6.34048614  | -6.93197334 |
| 1 | 0.13687378  | 6.57945736  | -6.11394268 |
| 1 | 2.46388927  | 6.81140800  | -5.31702945 |
| 1 | 4.86197161  | 6.96100893  | -4.59658371 |
| 1 | -4.37687589 | 5.21226480  | -6.83403049 |
| 1 | -4.90961433 | -6.88019486 | 4.70088752  |
| 1 | -2.58797651 | -6.62523954 | 5.52892569  |
| 1 | -0.26491380 | -6.37149160 | 6.36275516  |
| 1 | 2.05398532  | -6.11980682 | 7.20039415  |
| 1 | 8.71429895  | 0.16948684  | 4.16664328  |
| 1 | 7.22073397  | -1.54536401 | 5.14357572  |
| 1 | 5.72959261  | -3.26587751 | 6.12701156  |
| 1 | 4.24286790  | -4.98580763 | 7.11424159  |
| 1 | -6.72093741 | -6.18200749 | 3.17963706  |
| 1 | -7.54808595 | -4.71329180 | 1.36322427  |
| 1 | -8.38107267 | -3.24300797 | -0.45356414 |
| 1 | -9.21794397 | -1.77505875 | -2.26657944 |
| 1 | 9.09940532  | 1.99407721  | 2.55227645  |
| 1 | 8.27504356  | 3.44557832  | 0.72639328  |

|    |            |            |             |
|----|------------|------------|-------------|
| 1  | 7.46651182 | 4.88562335 | -1.11106016 |
| 1  | 6.68815359 | 6.25837779 | -3.06104015 |
| 24 | 5.05388330 | 4.02727005 | -4.15349348 |
| 6  | 4.57699008 | 2.24746904 | -4.40708395 |
| 6  | 6.80783268 | 3.56456240 | -4.40400210 |
| 6  | 4.95370899 | 4.28168421 | -5.96406197 |
| 8  | 4.88862985 | 4.45797578 | -7.11504849 |
| 8  | 7.92917307 | 3.28305847 | -4.55701619 |
| 8  | 4.28399526 | 1.13545812 | -4.57244885 |

### Ligand III

|   |             |             |             |
|---|-------------|-------------|-------------|
| 6 | 1.05651210  | -0.25868402 | 0.98912589  |
| 6 | 1.27796436  | 0.79932375  | 0.06294572  |
| 6 | 0.23439475  | 1.20640976  | -0.81539653 |
| 6 | -1.03057183 | 0.55539971  | -0.76764883 |
| 6 | -1.25201809 | -0.50261116 | 0.15853556  |
| 6 | -0.20845137 | -0.90969634 | 1.03687599  |
| 6 | -0.42973665 | -1.96630322 | 1.96217026  |
| 6 | 2.09877874  | -0.66510634 | 1.86663273  |
| 6 | 2.54137907  | 1.44974560  | 0.01545901  |
| 6 | 0.45549769  | 2.26337538  | -1.74031364 |
| 6 | -2.07301044 | 0.96220394  | -1.64478939 |
| 6 | -2.51560614 | -1.15269102 | 0.20642687  |
| 6 | 1.87640745  | -1.72328345 | 2.79299213  |
| 6 | 3.36374607  | -0.01326753 | 1.81851934  |
| 6 | 2.76203422  | 2.50817988  | -0.91101077 |
| 6 | 3.58463465  | 1.04221261  | 0.89457788  |
| 6 | -0.58891177 | 2.67021704  | -2.61836602 |
| 6 | 1.72099099  | 2.91425674  | -1.78724743 |
| 6 | -1.69540091 | -2.61677982 | 2.00956309  |
| 6 | 0.61449259  | -2.37270839 | 2.84064934  |
| 6 | -2.73643416 | -2.21069407 | 1.13332284  |

6 -3.55904095 -0.74471815 -0.67227429  
6 -3.33814150 0.31075394 -1.59619750  
6 -1.85083316 2.02079108 -2.57070719  
6 2.92287634 -2.13064237 3.67376349  
6 4.40944708 -0.42147932 2.69976662  
6 4.85252116 1.69562422 0.84661323  
6 4.03033384 3.16086740 -0.95808473  
6 -4.00507640 -2.86266046 1.18111989  
6 -4.82726631 -1.39741666 -0.62357282  
6 -4.38421052 0.71967074 -2.47671818  
6 -2.89765005 2.42885467 -3.45073919  
6 2.69826673 -3.18813301 4.59865575  
6 4.18619118 -1.47878323 3.62472425  
6 5.07182744 2.75285279 -0.07938449  
6 -4.22342628 -3.91948860 2.10825837  
6 -5.04671908 -2.45432588 0.30275303  
6 -5.64757281 0.06735160 -2.42619119  
6 -4.16111243 1.77729861 -3.40135159  
6 -5.86842214 -0.98791211 -1.50247276  
6 -1.91701549 -3.67714707 2.93870898  
6 0.39173849 -3.43319315 3.76938541  
6 -3.18261314 -4.32548382 2.98432522  
6 -0.87307463 -4.08235024 3.81580456  
6 3.75797858 -3.59335762 5.48371311  
6 1.43661063 -3.83740916 4.64630950  
6 -5.50513917 -4.57211092 2.15087732  
6 -6.32321773 -3.11065712 0.35143398  
6 -7.14454582 -1.65049774 -1.44758190  
6 -7.34217823 -2.68423155 -0.53379435  
6 -6.51451392 -4.15922450 1.28291024  
6 -5.21421188 2.18847381 -4.28707746  
6 -6.69761471 0.48509928 -3.31693980

|   |             |             |             |
|---|-------------|-------------|-------------|
| 6 | -7.96287481 | -0.19678630 | -3.23837373 |
| 6 | -6.46165839 | 1.52313147  | -4.21665843 |
| 6 | 3.49575124  | -4.66648454 | 6.40656881  |
| 6 | -8.17499414 | -1.21034360 | -2.35116821 |
| 1 | -8.76218915 | 0.11986950  | -3.91512608 |
| 6 | 1.20469770  | -4.90730181 | 5.58015134  |
| 6 | -1.09671924 | -5.14936204 | 4.75070929  |
| 6 | -3.39882034 | -5.39372425 | 3.92382063  |
| 6 | -5.69096259 | -5.63716893 | 3.10121495  |
| 6 | 4.24836285  | 4.21834222  | -1.88456301 |
| 6 | 1.94225658  | 3.97532581  | -2.71566915 |
| 6 | -0.36649453 | 3.73140733  | -3.54637191 |
| 6 | -2.67334724 | 3.48699108  | -4.37496141 |
| 6 | -4.96520216 | 3.24369304  | -5.19716218 |
| 6 | -3.73349269 | 3.89311598  | -5.25907931 |
| 6 | -1.41168337 | 4.13626770  | -4.42261996 |
| 6 | 0.89817383  | 4.38086010  | -3.59244688 |
| 6 | 5.52965423  | 4.87186255  | -1.92624252 |
| 6 | 3.20754582  | 4.62432067  | -2.76062839 |
| 6 | -4.69128984 | -6.02711753 | 3.94265639  |
| 6 | -0.04068895 | -5.53235887 | 5.61202988  |
| 6 | -2.36479641 | -5.77792085 | 4.77580710  |
| 6 | 2.28395469  | -5.29008977 | 6.45233423  |
| 1 | -7.26462594 | 1.83663749  | -4.89195139 |
| 1 | -5.76813271 | 3.55724740  | -5.87247611 |
| 6 | 4.98957014  | -2.94370829 | 5.42204536  |
| 6 | 5.23883700  | -1.88901643 | 4.51142226  |
| 6 | 5.67250559  | 0.23149252  | 2.64991063  |
| 6 | 5.89335954  | 1.28675732  | 1.72618967  |
| 6 | 6.34787903  | 3.41012229  | -0.12708568 |
| 6 | 6.53891913  | 4.45922024  | -1.05802925 |
| 6 | 7.36658140  | 2.98421737  | 0.75868782  |



|   |             |             |             |
|---|-------------|-------------|-------------|
| 6 | 7.16905458  | 1.95024268  | 1.67223454  |
| 6 | 6.72211194  | -0.18535755 | 3.54158857  |
| 6 | 6.48603235  | -1.22315734 | 4.44155014  |
| 6 | 7.98699296  | 0.49732059  | 3.46384715  |
| 6 | 8.19911703  | 1.51088104  | 2.57664267  |
| 6 | 5.71508610  | 5.93771471  | -2.87576610 |
| 6 | 3.42332110  | 5.69345504  | -3.69919929 |
| 6 | 1.12136731  | 5.44881098  | -4.52639249 |
| 6 | -1.18020169 | 5.20705887  | -5.35553676 |
| 6 | -3.47164220 | 4.96704063  | -6.18110726 |
| 6 | -2.25984520 | 5.59064783  | -6.22688484 |
| 6 | 2.38920496  | 6.07788422  | -4.55095500 |
| 6 | 0.06508463  | 5.83232427  | -5.38716683 |
| 6 | 4.71541261  | 6.32764676  | -3.71721324 |
| 1 | -2.08519092 | 6.40473645  | -6.93675876 |
| 1 | 0.23521550  | 6.64660727  | -6.09924845 |
| 1 | 2.55939762  | 6.89217292  | -5.26301772 |
| 1 | 4.88082464  | 7.14075751  | -4.43041478 |
| 1 | -4.27690920 | 5.27685820  | -6.85395555 |
| 1 | -4.85703811 | -6.83953853 | 4.65656795  |
| 1 | -2.53536634 | -6.59143759 | 5.48866344  |
| 1 | -0.21112175 | -6.34585339 | 6.32492074  |
| 1 | 2.10896628  | -6.10348826 | 7.16292038  |
| 1 | 8.78597994  | 0.18135368  | 4.14130588  |
| 1 | 7.28863556  | -1.53590228 | 5.11762738  |
| 1 | 5.79213775  | -3.25649477 | 6.09814785  |
| 1 | 4.30068775  | -4.97560134 | 7.08013446  |
| 1 | -6.66509747 | -6.13426731 | 3.13467953  |
| 1 | -7.48779101 | -4.65964071 | 1.32006602  |
| 1 | -8.31547086 | -3.18461924 | -0.49667540 |
| 1 | -9.14583454 | -1.71331312 | -2.31047561 |
| 1 | 9.16963055  | 2.01453953  | 2.53667049  |

|   |            |            |             |
|---|------------|------------|-------------|
| 1 | 8.33951459 | 3.48536281 | 0.72236908  |
| 1 | 7.51182956 | 4.96040451 | -1.09439987 |
| 1 | 6.68888852 | 6.43551387 | -2.90851826 |

**IIIa-Mo**

|   |             |             |             |
|---|-------------|-------------|-------------|
| 6 | 1.02097183  | -0.34249056 | 0.95238009  |
| 6 | 1.24342517  | 0.72015156  | 0.02147861  |
| 6 | 0.18902393  | 1.13230922  | -0.86501839 |
| 6 | -1.08140306 | 0.47729974  | -0.81778419 |
| 6 | -1.30547186 | -0.59097876 | 0.11820524  |
| 6 | -0.25655739 | -1.00061198 | 0.99979329  |
| 6 | -0.48705887 | -2.04427290 | 1.94695176  |
| 6 | 2.05934704  | -0.73356183 | 1.85099697  |
| 6 | 2.50390533  | 1.39087914  | -0.00817919 |
| 6 | 0.40291346  | 2.21068391  | -1.77609447 |
| 6 | -2.13660866 | 0.90339316  | -1.68062271 |
| 6 | -2.58229618 | -1.22661565 | 0.18374263  |
| 6 | 1.82102006  | -1.77713750 | 2.78536200  |
| 6 | 3.30897799  | -0.06632064 | 1.81089065  |
| 6 | 2.70737242  | 2.45934666  | -0.92229757 |
| 6 | 3.53056363  | 0.99288951  | 0.88385433  |
| 6 | -0.64787365 | 2.62314034  | -2.63288567 |
| 6 | 1.66290800  | 2.86697493  | -1.80139593 |
| 6 | -1.75598560 | -2.67280272 | 2.00202364  |
| 6 | 0.55488891  | -2.42870188 | 2.83310519  |
| 6 | -2.80066849 | -2.26527491 | 1.12286931  |
| 6 | -3.62332746 | -0.79863287 | -0.68346084 |
| 6 | -3.40164875 | 0.26038947  | -1.61039125 |
| 6 | -1.91409898 | 1.97134975  | -2.58513188 |
| 6 | 2.85858666  | -2.16890142 | 3.67984306  |
| 6 | 4.34684633  | -0.45931820 | 2.70680492  |
| 6 | 4.79049655  | 1.66068531  | 0.85125763  |

6 3.96654329 3.12552024 -0.95422555  
6 -4.07551878 -2.90170676 1.18609762  
6 -4.89636488 -1.43536532 -0.61959965  
6 -4.45291353 0.68340626 -2.47420453  
6 -2.96718046 2.39400442 -3.44931684  
6 2.62719622 -3.21618079 4.61555179  
6 4.11945582 -1.51109010 3.63551699  
6 5.00530274 2.72189337 -0.06964546  
6 -4.29716945 -3.94721414 2.12475323  
6 -5.11754844 -2.48722262 0.31270201  
6 -5.72122254 0.04052285 -2.41147702  
6 -4.23135735 1.74662285 -3.39338878  
6 -5.94191858 -1.01386221 -1.48849675  
6 -1.98465472 -3.71734844 2.94600722  
6 0.32538551 -3.47241037 3.77557094  
6 -3.25571544 -4.35344149 3.00138711  
6 -0.94262513 -4.11579981 3.82680465  
6 3.68135045 -3.60875242 5.51223824  
6 1.36651880 -3.86483878 4.66321230  
6 -5.58333394 -4.58669433 2.17951599  
6 -6.40034034 -3.12985891 0.37508915  
6 -7.22297799 -1.66480334 -1.42079973  
6 -7.42167110 -2.69538868 -0.50388474  
6 -6.59443549 -4.17021118 1.31344145  
6 -5.29073994 2.17090917 -4.26528969  
6 -6.77599857 0.47051777 -3.29010100  
6 -8.04502160 -0.20221529 -3.20200365  
6 -6.54103508 1.51136274 -4.18661788  
6 3.41449630 -4.67230724 6.44412016  
6 -8.25714025 -1.21553120 -2.31490562  
1 -8.84760985 0.12115815 -3.87118376  
6 1.12816976 -4.92240239 5.60881996

6 -1.17253821 -5.16908313 4.77562018  
6 -3.47711501 -5.40823580 3.95247044  
6 -5.77329739 -5.64156877 3.13937816  
6 4.17809030 4.19375212 -1.87073334  
6 1.87684636 3.94078402 -2.71313686  
6 -0.43263528 3.69831905 -3.54499616  
6 -2.74616081 3.46265837 -4.36167737  
6 -5.04476846 3.23235731 -5.16711284  
6 -3.81095938 3.87990381 -5.23246601  
6 -1.48369623 4.11231395 -4.40938394  
6 0.82947382 4.35097268 -3.58449590  
6 5.45367261 4.85818711 -1.89980640  
6 3.13815309 4.59945356 -2.74608809  
6 -4.77361442 -6.03149371 3.98089723  
6 -0.11868868 -5.54405122 5.64351285  
6 -2.44321314 -5.78941435 4.80781402  
6 2.20287587 -5.29569592 6.48997120  
1 -7.34824920 1.83321925 -4.85242378  
1 -5.85145638 3.55506290 -5.83310259  
6 4.91132071 -2.95605908 5.45325633  
6 5.16546557 -1.90799704 4.53595174  
6 5.60381877 0.20527902 2.66656059  
6 5.82479714 1.26122236 1.74227815  
6 6.27486586 3.39239240 -0.10388097  
6 6.46119042 4.44819507 -1.02853525  
6 7.28897237 2.97356388 0.78865592  
6 7.09325490 1.93606175 1.70033291  
6 6.64629620 -0.19941363 3.56966652  
6 6.40803914 -1.23527766 4.47304935  
6 7.90597680 0.49247645 3.50131859  
6 8.11812621 1.50604472 2.61405431  
6 5.63454731 5.93250762 -2.83995049

|    |             |             |             |
|----|-------------|-------------|-------------|
| 6  | 3.34755178  | 5.67977177  | -3.67263169 |
| 6  | 1.04656472  | 5.43194563  | -4.50471616 |
| 6  | -1.25771928 | 5.19372408  | -5.32896058 |
| 6  | -3.55331373 | 4.96259259  | -6.14437204 |
| 6  | -2.34144775 | 5.58616958  | -6.19018013 |
| 6  | 2.31193317  | 6.06680663  | -4.52116978 |
| 6  | -0.01249632 | 5.82181576  | -5.35729781 |
| 6  | 4.63507913  | 6.32238950  | -3.68125888 |
| 1  | -2.17083734 | 6.40721967  | -6.89254345 |
| 1  | 0.15297517  | 6.64471890  | -6.06005809 |
| 1  | 2.47844266  | 6.88960451  | -5.22384836 |
| 1  | 4.79748566  | 7.14217940  | -4.38701424 |
| 1  | -4.36144449 | 5.28001562  | -6.80973809 |
| 1  | -4.94345372 | -6.83615162 | 4.70216360  |
| 1  | -2.61848276 | -6.59344214 | 5.52978850  |
| 1  | -0.29294887 | -6.34822483 | 6.36560876  |
| 1  | 2.02482942  | -6.10158263 | 7.20785051  |
| 1  | 8.70155117  | 0.18438212  | 4.18592384  |
| 1  | 7.20626224  | -1.53854895 | 5.15809542  |
| 1  | 5.70905254  | -3.26019057 | 6.13853524  |
| 1  | 4.21558420  | -4.97442931 | 7.12493108  |
| 42 | 0.61032364  | -1.28097373 | -1.31931315 |
| 6  | 1.48119832  | -2.99137696 | -1.00030576 |
| 6  | 1.93059325  | -0.99804017 | -2.71980741 |
| 6  | -0.45403308 | -2.20183791 | -2.66277316 |
| 8  | -1.11287000 | -2.74168123 | -3.45961672 |
| 8  | 2.72574858  | -0.80120142 | -3.55015656 |
| 8  | 2.00209905  | -4.01234593 | -0.78410083 |
| 1  | -6.75052067 | -6.13131064 | 3.18100656  |
| 1  | -7.57162029 | -4.66146820 | 1.36032946  |
| 1  | -8.39908580 | -3.18634006 | -0.45798382 |
| 1  | -9.23115695 | -1.71104702 | -2.26718131 |

|   |            |            |             |
|---|------------|------------|-------------|
| 1 | 9.08504218 | 2.01652949 | 2.58205897  |
| 1 | 8.25742300 | 3.48328180 | 0.76185930  |
| 1 | 7.42946740 | 4.95824608 | -1.05629952 |
| 1 | 6.60465913 | 6.43722022 | -2.86580761 |

**IIIb-Mo**

|   |              |              |              |
|---|--------------|--------------|--------------|
| 6 | 1.104292360  | -0.241639390 | 0.901921140  |
| 6 | 1.307938680  | 0.840504870  | 0.004908190  |
| 6 | 0.260855240  | 1.261724110  | -0.870395020 |
| 6 | -0.997915380 | 0.603840520  | -0.854595960 |
| 6 | -1.212191430 | -0.488749200 | 0.041100410  |
| 6 | -0.156844440 | -0.914982290 | 0.921161110  |
| 6 | -0.379286230 | -1.988367770 | 1.837983680  |
| 6 | 2.129697830  | -0.649695260 | 1.788547280  |
| 6 | 2.560878360  | 1.507422700  | -0.015477030 |
| 6 | 0.473508600  | 2.346542740  | -1.760674830 |
| 6 | -2.047704640 | 1.029995110  | -1.703701490 |
| 6 | -2.481346130 | -1.144527630 | 0.078403680  |
| 6 | 1.907153610  | -1.724792130 | 2.702296170  |
| 6 | 3.385540380  | 0.019109610  | 1.767102290  |
| 6 | 2.774225640  | 2.591894470  | -0.914250960 |
| 6 | 3.601047870  | 1.092866150  | 0.864617130  |
| 6 | -0.574465010 | 2.771420890  | -2.626564390 |
| 6 | 1.733898600  | 3.010088680  | -1.784186210 |
| 6 | -1.656693990 | -2.650332260 | 1.871915820  |
| 6 | 0.660899460  | -2.391998510 | 2.731269040  |
| 6 | -2.704824150 | -2.227914940 | 0.998923540  |
| 6 | -3.537653410 | -0.704275090 | -0.779163930 |
| 6 | -3.316567410 | 0.375191890  | -1.664865320 |
| 6 | -1.833389930 | 2.117082860  | -2.596270250 |
| 6 | 2.945808800  | -2.128801630 | 3.592368390  |
| 6 | 4.424520910  | -0.391021490 | 2.654940630  |

|   |              |              |              |
|---|--------------|--------------|--------------|
| 6 | 4.860770900  | 1.762795170  | 0.842206060  |
| 6 | 4.034832660  | 3.258532740  | -0.936208210 |
| 6 | -3.986474160 | -2.866303510 | 1.054819280  |
| 6 | -4.805454600 | -1.350298150 | -0.719065600 |
| 6 | -4.368973670 | 0.811982710  | -2.522988360 |
| 6 | -2.886274720 | 2.547776650  | -3.457616950 |
| 6 | 2.718025010  | -3.195091720 | 4.504635510  |
| 6 | 4.202215670  | -1.462959640 | 3.563892280  |
| 6 | 5.074644130  | 2.841482480  | -0.059356490 |
| 6 | -4.202103590 | -3.918276430 | 1.978909520  |
| 6 | -5.025520540 | -2.425350770 | 0.194257720  |
| 6 | -5.632571960 | 0.162229600  | -2.476366080 |
| 6 | -4.149767600 | 1.894569100  | -3.418854970 |
| 6 | -5.851463760 | -0.913794330 | -1.574666930 |
| 6 | -1.887400810 | -3.710944180 | 2.808521770  |
| 6 | 0.423131970  | -3.452568510 | 3.651829390  |
| 6 | -3.156474530 | -4.338722650 | 2.852427900  |
| 6 | -0.845683360 | -4.106111640 | 3.687631960  |
| 6 | 3.770829260  | -3.598965640 | 5.397539830  |
| 6 | 1.459079830  | -3.853204900 | 4.536532590  |
| 6 | -5.488764570 | -4.557273790 | 2.026160470  |
| 6 | -6.306723380 | -3.067735560 | 0.247326670  |
| 6 | -7.132427440 | -1.568555100 | -1.518852180 |
| 6 | -7.329939230 | -2.615928600 | -0.622736650 |
| 6 | -6.499286850 | -4.126240350 | 1.167844530  |
| 6 | -5.207791200 | 2.330223550  | -4.284553340 |
| 6 | -6.688598860 | 0.606155180  | -3.346321210 |
| 6 | -7.956354750 | -0.072179900 | -3.271386760 |
| 6 | -6.456359080 | 1.664980700  | -4.221263870 |
| 6 | 3.505606980  | -4.680711850 | 6.309969140  |
| 6 | -8.167213710 | -1.102630880 | -2.404541560 |
| 1 | -8.759509170 | 0.262442660  | -3.934350250 |

|   |              |              |              |
|---|--------------|--------------|--------------|
| 6 | 1.222179780  | -4.927952510 | 5.464788100  |
| 6 | -1.074855670 | -5.171464280 | 4.620231540  |
| 6 | -3.378660920 | -5.405754790 | 3.789699100  |
| 6 | -5.676263990 | -5.626925670 | 2.971817400  |
| 6 | 4.246833790  | 4.340187880  | -1.834882450 |
| 6 | 1.947293710  | 4.097571970  | -2.681844810 |
| 6 | -0.359100940 | 3.860896780  | -3.522458070 |
| 6 | -2.668015680 | 3.631484950  | -4.350869510 |
| 6 | -4.963453610 | 3.409103980  | -5.167448300 |
| 6 | -3.732512530 | 4.060398330  | -5.218219160 |
| 6 | -1.407594330 | 4.285551050  | -4.383900880 |
| 6 | 0.901260500  | 4.518905570  | -3.549206690 |
| 6 | 5.521666760  | 5.006939230  | -1.853651020 |
| 6 | 3.206416180  | 4.758350790  | -2.704942000 |
| 6 | -4.676741910 | -6.028798530 | 3.807226840  |
| 6 | -0.021018980 | -5.554785600 | 5.486536460  |
| 6 | -2.345112360 | -5.796561870 | 4.639734740  |
| 6 | 2.297221300  | -5.310357210 | 6.342548750  |
| 1 | -7.263573750 | 1.997488360  | -4.881799970 |
| 1 | -5.769682170 | 3.740554090  | -5.829721370 |
| 6 | 4.997193060  | -2.939551230 | 5.354120300  |
| 6 | 5.247723640  | -1.872851560 | 4.456964530  |
| 6 | 5.679075540  | 0.276353700  | 2.628548550  |
| 6 | 5.896839210  | 1.349612060  | 1.723976850  |
| 6 | 6.342695060  | 3.513300930  | -0.082654390 |
| 6 | 6.529033200  | 4.584609260  | -0.989235860 |
| 6 | 7.358560430  | 3.080663120  | 0.802432930  |
| 6 | 7.164733670  | 2.027728220  | 1.694509060  |
| 6 | 6.723539650  | -0.142317940 | 3.524740100  |
| 6 | 6.488855800  | -1.194287470 | 4.408052060  |
| 6 | 7.981705900  | 0.554327490  | 3.469326290  |
| 6 | 8.191005230  | 1.583773670  | 2.600701280  |



|    |              |              |              |
|----|--------------|--------------|--------------|
| 6  | 5.701855340  | 6.096543040  | -2.776601020 |
| 6  | 3.415972160  | 5.853194820  | -3.614607290 |
| 6  | 1.117608900  | 5.613267810  | -4.452181520 |
| 6  | -1.182901600 | 5.382702620  | -5.286094660 |
| 6  | -3.475733580 | 5.159177110  | -6.111581100 |
| 6  | -2.265881930 | 5.786316470  | -6.143875650 |
| 6  | 2.381310600  | 6.251542550  | -4.457910520 |
| 6  | 0.059281440  | 6.014230560  | -5.301744200 |
| 6  | 4.702695400  | 6.498086040  | -3.612188980 |
| 1  | -2.095422480 | 6.619440220  | -6.831917750 |
| 1  | 0.224651540  | 6.848528380  | -5.991015320 |
| 1  | 2.546602950  | 7.085393060  | -5.147753390 |
| 1  | 4.864008330  | 7.329331880  | -4.304685660 |
| 1  | -4.283320760 | 5.485255300  | -6.773392990 |
| 1  | -4.847435970 | -6.843600090 | 4.516708010  |
| 1  | -2.519274520 | -6.611393580 | 5.349594240  |
| 1  | -0.194161990 | -6.370326080 | 6.195917710  |
| 1  | 2.121548200  | -6.129119120 | 7.046260310  |
| 1  | 8.777752850  | 0.235992240  | 4.148656250  |
| 1  | 7.287609000  | -1.507852740 | 5.087856600  |
| 1  | 5.795011320  | -3.252287870 | 6.035389080  |
| 1  | 4.306288770  | -4.990953200 | 6.987619790  |
| 1  | -6.653188970 | -6.117587770 | 3.007448470  |
| 1  | -7.476437590 | -4.617988770 | 1.206469660  |
| 1  | -8.306970780 | -3.108171220 | -0.585432250 |
| 1  | -9.140423300 | -1.600527550 | -2.367111350 |
| 1  | 9.156372750  | 2.097674630  | 2.577819260  |
| 1  | 8.326001650  | 3.592746310  | 0.784118100  |
| 1  | 7.496855200  | 5.095967210  | -1.007873610 |
| 1  | 6.671247550  | 6.603043670  | -2.793286430 |
| 42 | -0.798642110 | -2.891848410 | -0.435293090 |
| 6  | 0.029179940  | -4.629062360 | -0.130923230 |

|   |              |              |              |
|---|--------------|--------------|--------------|
| 6 | 0.548063370  | -2.616678880 | -1.818692940 |
| 6 | -1.870272530 | -3.770825300 | -1.804500890 |
| 8 | -2.535014700 | -4.282794200 | -2.614219820 |
| 8 | 1.357589510  | -2.427992740 | -2.635904270 |
| 8 | 0.520941470  | -5.665526300 | 0.077121780  |

**TS(III)-Mo**

|   |             |             |             |
|---|-------------|-------------|-------------|
| 6 | 1.05076594  | -0.26635959 | 0.99224953  |
| 6 | 1.26335215  | 0.80389286  | 0.07257799  |
| 6 | 0.22171012  | 1.20003749  | -0.81875791 |
| 6 | -1.05014247 | 0.55350723  | -0.77090855 |
| 6 | -1.26782363 | -0.50966334 | 0.16771226  |
| 6 | -0.21574438 | -0.92234040 | 1.05176688  |
| 6 | -0.44301477 | -1.97387374 | 1.98440036  |
| 6 | 2.08830785  | -0.66445736 | 1.87810599  |
| 6 | 2.51929743  | 1.45625231  | 0.02584674  |
| 6 | 0.43303503  | 2.26331485  | -1.73772416 |
| 6 | -2.10208765 | 0.96062172  | -1.63972706 |
| 6 | -2.52499103 | -1.19082619 | 0.19168135  |
| 6 | 1.86103284  | -1.71280065 | 2.81267605  |
| 6 | 3.34811046  | -0.00447463 | 1.83000930  |
| 6 | 2.73623272  | 2.51497084  | -0.90308237 |
| 6 | 3.56426846  | 1.05037817  | 0.90570913  |
| 6 | -0.61859650 | 2.67305471  | -2.60391328 |
| 6 | 1.69567297  | 2.91828281  | -1.77963487 |
| 6 | -1.71161020 | -2.61985682 | 2.03481708  |
| 6 | 0.59966441  | -2.36535355 | 2.86622271  |
| 6 | -2.74347135 | -2.23582919 | 1.13888421  |
| 6 | -3.57467894 | -0.76562563 | -0.67683307 |
| 6 | -3.36711285 | 0.30832404  | -1.58151989 |
| 6 | -1.88217166 | 2.02440316  | -2.55518090 |
| 6 | 2.90529440  | -2.11004704 | 3.69956527  |
| 6 | 4.39108438  | -0.40435969 | 2.71653888  |

|   |             |             |             |
|---|-------------|-------------|-------------|
| 6 | 4.82782675  | 1.70851446  | 0.85781721  |
| 6 | 4.00094739  | 3.17106174  | -0.94845197 |
| 6 | -4.01117214 | -2.88407065 | 1.18799541  |
| 6 | -4.83926918 | -1.41936892 | -0.62093028 |
| 6 | -4.41513848 | 0.72107221  | -2.45247016 |
| 6 | -2.93507041 | 2.43752949  | -3.42435451 |
| 6 | 2.67888899  | -3.15881576 | 4.63318672  |
| 6 | 4.16715469  | -1.45602167 | 3.64709549  |
| 6 | 5.04318713  | 2.76616568  | -0.06890143 |
| 6 | -4.23106898 | -3.93008426 | 2.12691760  |
| 6 | -5.05164862 | -2.47858907 | 0.30563243  |
| 6 | -5.67469487 | 0.06225579  | -2.40307470 |
| 6 | -4.19732532 | 1.78536827  | -3.37074290 |
| 6 | -5.88639040 | -1.00222445 | -1.48903249 |
| 6 | -1.93255838 | -3.67000601 | 2.97057342  |
| 6 | 0.37421380  | -3.41578789 | 3.80457757  |
| 6 | -3.19517901 | -4.32340281 | 3.01328024  |
| 6 | -0.88992235 | -4.06462014 | 3.85408057  |
| 6 | 3.73694434  | -3.55502459 | 5.52282100  |
| 6 | 1.41772247  | -3.80933178 | 4.68578369  |
| 6 | -5.51114844 | -4.58450212 | 2.16940356  |
| 6 | -6.32691209 | -3.13374321 | 0.35894368  |
| 6 | -7.15978047 | -1.66847425 | -1.43193689 |
| 6 | -7.34921062 | -2.70706228 | -0.52277092 |
| 6 | -6.51709164 | -4.17887778 | 1.29494455  |
| 6 | -5.25453978 | 2.19959118  | -4.24835721 |
| 6 | -6.72919079 | 0.48394843  | -3.28560172 |
| 6 | -7.99083125 | -0.20411450 | -3.20733176 |
| 6 | -6.50023927 | 1.53019901  | -4.17713087 |
| 6 | 3.47474638  | -4.62011548 | 6.45438162  |
| 6 | -8.19537089 | -1.22519959 | -2.32757864 |
| 1 | -8.79387657 | 0.11355203  | -3.87865185 |

6 1.18542489 -4.87048423 5.62818419  
6 -1.11413822 -5.12376801 4.79611187  
6 -3.41190596 -5.38351862 3.96081624  
6 -5.69820213 -5.64208163 3.12734434  
6 4.21497059 4.23054559 -1.87338011  
6 1.91016966 3.98377042 -2.70286999  
6 -0.40222792 3.74014863 -3.52551726  
6 -2.71502609 3.50048988 -4.34196511  
6 -5.01046256 3.26034045 -5.15275527  
6 -3.77948392 3.91122510 -5.21738002  
6 -1.45288654 4.14928339 -4.39243667  
6 0.86178280 4.39036921 -3.57329229  
6 5.49384525 4.88769061 -1.91456437  
6 3.17275019 4.63630408 -2.74696578  
6 -4.70193981 -6.02136061 3.97706527  
6 -0.05936143 -5.49694682 5.66264647  
6 -2.38093500 -5.75584488 4.82125539  
6 2.26384579 -5.24441275 6.50450927  
1 -7.30636611 1.84587800 -4.84703728  
1 -5.81605829 3.57639576 -5.82321740  
6 4.96793923 -2.90449025 5.45684774  
6 5.21812554 -1.85716737 4.53888872  
6 5.65094799 0.25297932 2.66651496  
6 5.86887870 1.30518750 1.73948774  
6 6.31571724 3.42718444 -0.11621312  
6 6.50380099 4.47694535 -1.04710956  
6 7.33572336 3.00547868 0.77018043  
6 7.14177929 1.97289943 1.68525742  
6 6.69980317 -0.15641432 3.56197599  
6 6.46426220 -1.18937234 4.46680420  
6 7.96269952 0.52903756 3.48221943  
6 8.17238881 1.53934995 2.59143412

|    |             |             |             |
|----|-------------|-------------|-------------|
| 6  | 5.67573184  | 5.95532392  | -2.86237945 |
| 6  | 3.38364363  | 5.70905913  | -3.68199025 |
| 6  | 1.07939634  | 5.46322967  | -4.50193003 |
| 6  | -1.22675866 | 5.22455081  | -5.32011034 |
| 6  | -3.52217868 | 4.98964816  | -6.13474450 |
| 6  | -2.31064233 | 5.61282082  | -6.18348378 |
| 6  | 2.34631839  | 6.09426002  | -4.52861443 |
| 6  | 0.01856337  | 5.84974331  | -5.35478859 |
| 6  | 4.67434322  | 6.34533364  | -3.70101681 |
| 1  | -2.13930942 | 6.42975907  | -6.89042100 |
| 1  | 0.18454266  | 6.66728092  | -6.06372393 |
| 1  | 2.51250626  | 6.91115223  | -5.23817834 |
| 1  | 4.83739114  | 7.15980900  | -4.41275117 |
| 1  | -4.33007481 | 5.30273935  | -6.80238914 |
| 1  | -4.86874132 | -6.82905412 | 4.69558663  |
| 1  | -2.55161005 | -6.56412537 | 5.53946218  |
| 1  | -0.22920226 | -6.30538579 | 6.38096083  |
| 1  | 2.08966038  | -6.05219974 | 7.22117601  |
| 1  | 8.76219843  | 0.21778720  | 4.16078060  |
| 1  | 7.26609055  | -1.49677156 | 5.14576597  |
| 1  | 5.76955293  | -3.21123499 | 6.13642798  |
| 1  | 4.27929192  | -4.92317501 | 7.13066907  |
| 1  | -6.67013105 | -6.14283793 | 3.15939760  |
| 1  | -7.48955443 | -4.68018509 | 1.33241883  |
| 1  | -8.32079403 | -3.20992508 | -0.48337703 |
| 1  | -9.16366016 | -1.73239370 | -2.28757723 |
| 1  | 9.14148033  | 2.04494944  | 2.54981181  |
| 1  | 8.30681222  | 3.50951295  | 0.73291369  |
| 1  | 7.47530195  | 4.98025063  | -1.08347830 |
| 1  | 6.64844481  | 6.45451778  | -2.89609482 |
| 42 | -0.17950678 | -1.88995194 | -1.44809036 |
| 6  | -0.06266299 | -3.79241610 | -1.23440038 |

|   |             |             |             |
|---|-------------|-------------|-------------|
| 6 | 1.54349620  | -1.96005313 | -2.29376931 |
| 6 | -0.95010716 | -2.22293514 | -3.17261181 |
| 8 | -1.43894558 | -2.42083810 | -4.21737965 |
| 8 | 2.60027978  | -1.98228794 | -2.79566073 |
| 8 | -0.00741359 | -4.95259226 | -1.09084755 |

**TS'(III)-Mo**

|   |             |             |             |
|---|-------------|-------------|-------------|
| 6 | 1.07197617  | -0.22983699 | 0.98229637  |
| 6 | 1.28402777  | 0.83157581  | 0.05763467  |
| 6 | 0.24609897  | 1.21829819  | -0.83651376 |
| 6 | -1.01750189 | 0.55735017  | -0.80294333 |
| 6 | -1.24881563 | -0.48265058 | 0.15370509  |
| 6 | -0.19017030 | -0.89119598 | 1.03200188  |
| 6 | -0.41486155 | -1.95498794 | 1.95511160  |
| 6 | 2.10829614  | -0.63140025 | 1.86389035  |
| 6 | 2.54134060  | 1.48636751  | 0.01285414  |
| 6 | 0.45914078  | 2.27554580  | -1.75942105 |
| 6 | -2.07509258 | 0.97252820  | -1.66248102 |
| 6 | -2.52296363 | -1.13649965 | 0.20291436  |
| 6 | 1.88655018  | -1.69164772 | 2.78945210  |
| 6 | 3.36807703  | 0.02880473  | 1.81865867  |
| 6 | 2.75925117  | 2.54061952  | -0.91840956 |
| 6 | 3.58414115  | 1.08485116  | 0.89544980  |
| 6 | -0.58932035 | 2.67802541  | -2.63598164 |
| 6 | 1.71988805  | 2.93588049  | -1.80019238 |
| 6 | -1.69156161 | -2.59077537 | 2.02169225  |
| 6 | 0.63076432  | -2.35102604 | 2.83621365  |
| 6 | -2.73474140 | -2.19481099 | 1.13847506  |
| 6 | -3.56900038 | -0.71837090 | -0.66989504 |
| 6 | -3.34820498 | 0.34036466  | -1.59100020 |
| 6 | -1.85372094 | 2.03199711  | -2.58429439 |
| 6 | 2.93228325  | -2.09141544 | 3.67333897  |

|   |             |             |             |
|---|-------------|-------------|-------------|
| 6 | 4.41212010  | -0.37386084 | 2.70225868  |
| 6 | 4.84774157  | 1.74376459  | 0.84852284  |
| 6 | 4.02353957  | 3.19904402  | -0.96300040 |
| 6 | -4.00752638 | -2.83501813 | 1.19751398  |
| 6 | -4.83757644 | -1.36285041 | -0.60326194 |
| 6 | -4.39827395 | 0.75413951  | -2.45953315 |
| 6 | -2.90778249 | 2.44820654  | -3.45130442 |
| 6 | 2.70969224  | -3.14839204 | 4.59901367  |
| 6 | 4.19142810  | -1.43217437 | 3.62637721  |
| 6 | 5.06380730  | 2.79933997  | -0.07970836 |
| 6 | -4.22220384 | -3.88473953 | 2.13236865  |
| 6 | -5.05199378 | -2.41769993 | 0.32788381  |
| 6 | -5.66475349 | 0.10922476  | -2.39596802 |
| 6 | -4.17510792 | 1.80711496  | -3.38863808 |
| 6 | -5.88375345 | -0.94502454 | -1.47089397 |
| 6 | -1.91038834 | -3.64304481 | 2.95218238  |
| 6 | 0.40519459  | -3.40429789 | 3.77069042  |
| 6 | -3.17834045 | -4.28861266 | 3.00399082  |
| 6 | -0.86088316 | -4.04878334 | 3.82418177  |
| 6 | 3.76933175  | -3.54740681 | 5.48604653  |
| 6 | 1.45053715  | -3.80172192 | 4.64878237  |
| 6 | -5.50651197 | -4.53006116 | 2.18541974  |
| 6 | -6.33149071 | -3.06575607 | 0.38919562  |
| 6 | -7.16184850 | -1.59987175 | -1.40258897 |
| 6 | -7.35527014 | -2.63288480 | -0.48645574 |
| 6 | -6.51901265 | -4.11283388 | 1.32388802  |
| 6 | -5.23335394 | 2.22358633  | -4.26451911 |
| 6 | -6.71924951 | 0.53227831  | -3.27696967 |
| 6 | -7.98712630 | -0.14212577 | -3.18574885 |
| 6 | -6.48436659 | 1.56746937  | -4.18077891 |
| 6 | 3.51048518  | -4.61978701 | 6.41023505  |
| 6 | -8.19751323 | -1.15383537 | -2.29619208 |

|   |             |             |             |
|---|-------------|-------------|-------------|
| 1 | -8.79066697 | 0.17717573  | -3.85556978 |
| 6 | 1.22020134  | -4.86771326 | 5.58627340  |
| 6 | -1.08345869 | -5.11070160 | 4.76264553  |
| 6 | -3.39140554 | -5.35242175 | 3.94746286  |
| 6 | -5.68932348 | -5.59174279 | 3.13947784  |
| 6 | 4.23851020  | 4.25366270  | -1.89232667 |
| 6 | 1.93657760  | 3.99594791  | -2.72930861 |
| 6 | -0.37157260 | 3.74173535  | -3.56050962 |
| 6 | -2.68476791 | 3.50518799  | -4.37586197 |
| 6 | -4.98433290 | 3.27505496  | -5.17861795 |
| 6 | -3.74953429 | 3.91655919  | -5.25139975 |
| 6 | -1.42110124 | 4.14870184  | -4.43086518 |
| 6 | 0.89149408  | 4.39473019  | -3.60704049 |
| 6 | 5.51630078  | 4.91310426  | -1.93274350 |
| 6 | 3.19816213  | 4.65141454  | -2.77213154 |
| 6 | -4.68532970 | -5.98221576 | 3.97491910  |
| 6 | -0.02510019 | -5.49228385 | 5.62162446  |
| 6 | -2.35365510 | -5.73573327 | 4.79507663  |
| 6 | 2.30073006  | -5.24634091 | 6.45803698  |
| 1 | -7.29098294 | 1.88440303  | -4.84951105 |
| 1 | -5.79004874 | 3.59230371  | -5.84837577 |
| 6 | 4.99752460  | -2.89179381 | 5.42510762  |
| 6 | 5.24375944  | -1.83626395 | 4.51493441  |
| 6 | 5.67103172  | 0.28570130  | 2.65478929  |
| 6 | 5.88817247  | 1.34102016  | 1.73058310  |
| 6 | 6.33619606  | 3.46173048  | -0.12632666 |
| 6 | 6.52475436  | 4.50827469  | -1.06040552 |
| 6 | 7.35474411  | 3.04276724  | 0.76268518  |
| 6 | 7.16045132  | 2.00997097  | 1.67790129  |
| 6 | 6.72061838  | -0.12552108 | 3.54829403  |
| 6 | 6.48757966  | -1.16424962 | 4.44757118  |
| 6 | 7.98202314  | 0.56292573  | 3.47205345  |



|    |             |             |             |
|----|-------------|-------------|-------------|
| 6  | 8.19065185  | 1.57633695  | 2.58436687  |
| 6  | 5.69912762  | 5.97593463  | -2.88559657 |
| 6  | 3.41078397  | 5.71877656  | -3.71250343 |
| 6  | 1.11073641  | 5.46292083  | -4.54029092 |
| 6  | -1.19272676 | 5.21969896  | -5.36358364 |
| 6  | -3.48878380 | 4.98758504  | -6.17632927 |
| 6  | -2.27518716 | 5.60592164  | -6.22964767 |
| 6  | 2.37596392  | 6.09657132  | -4.56571645 |
| 6  | 0.05235063  | 5.84411892  | -5.39906578 |
| 6  | 4.69981133  | 6.35837719  | -3.73023711 |
| 1  | -2.10171975 | 6.41808443  | -6.94139965 |
| 1  | 0.22008527  | 6.65814536  | -6.11162133 |
| 1  | 2.54300962  | 6.90991282  | -5.27918579 |
| 1  | 4.86331212  | 7.16917212  | -4.44607835 |
| 1  | -4.29624478 | 5.29963590  | -6.84500314 |
| 1  | -4.84869625 | -6.79301513 | 4.69068349  |
| 1  | -2.52240428 | -6.54672329 | 5.51067830  |
| 1  | -0.19414757 | -6.30390552 | 6.33648263  |
| 1  | 2.12871946  | -6.05891877 | 7.16979875  |
| 1  | 8.78162116  | 0.25101486  | 4.15021017  |
| 1  | 7.29028291  | -1.47350255 | 5.12466979  |
| 1  | 5.80033647  | -3.20051683 | 6.10235800  |
| 1  | 4.31642304  | -4.92585091 | 7.08346995  |
| 1  | -6.66393861 | -6.08653495 | 3.18039152  |
| 1  | -7.49403870 | -4.60845756 | 1.36878078  |
| 1  | -8.33049718 | -3.12801456 | -0.44059659 |
| 1  | -9.17052491 | -1.65110983 | -2.24754611 |
| 1  | 9.15897619  | 2.08361441  | 2.54501067  |
| 1  | 8.32548777  | 3.54753935  | 0.72653893  |
| 1  | 7.49544503  | 5.01315215  | -1.09656875 |
| 1  | 6.67068034  | 6.47745259  | -2.91856556 |
| 42 | -0.53508935 | -2.33862372 | -1.17861991 |

|   |             |             |             |
|---|-------------|-------------|-------------|
| 6 | -0.49808685 | -4.24665749 | -0.97968795 |
| 6 | 1.20011764  | -2.47055422 | -1.98570385 |
| 6 | -1.26403752 | -2.61463492 | -2.93073364 |
| 8 | -1.71443464 | -2.76370204 | -4.00073724 |
| 8 | 2.26067932  | -2.53146928 | -2.47680838 |
| 8 | -0.48702579 | -5.40814106 | -0.83560152 |

**IM(IIIa-b)-Mo**

|   |             |             |             |
|---|-------------|-------------|-------------|
| 6 | 1.07714245  | -0.27176606 | 0.97363546  |
| 6 | 1.28890570  | 0.79811689  | 0.05644708  |
| 6 | 0.24908238  | 1.19323941  | -0.83426387 |
| 6 | -1.01601440 | 0.53639273  | -0.79901784 |
| 6 | -1.23684642 | -0.52917822 | 0.13779169  |
| 6 | -0.18204703 | -0.93907577 | 1.02161205  |
| 6 | -0.41566501 | -1.98344863 | 1.96122239  |
| 6 | 2.11194761  | -0.66651751 | 1.86207923  |
| 6 | 2.54320909  | 1.45636250  | 0.01532315  |
| 6 | 0.45825219  | 2.25913181  | -1.74864331 |
| 6 | -2.07353372 | 0.94958870  | -1.65871167 |
| 6 | -2.51025147 | -1.18687127 | 0.18811335  |
| 6 | 1.88593559  | -1.71873479 | 2.79468191  |
| 6 | 3.37049535  | -0.00323111 | 1.81929028  |
| 6 | 2.75916660  | 2.51762206  | -0.90985795 |
| 6 | 3.58673956  | 1.05351536  | 0.89715834  |
| 6 | -0.59310906 | 2.66702963  | -2.61827430 |
| 6 | 1.71869801  | 2.91904180  | -1.78741679 |
| 6 | -1.68983032 | -2.61882563 | 2.02611295  |
| 6 | 0.62579104  | -2.37258959 | 2.84742478  |
| 6 | -2.72799175 | -2.22900046 | 1.13752450  |
| 6 | -3.55945159 | -0.75803311 | -0.67799857 |
| 6 | -3.34581703 | 0.31081305  | -1.58972520 |
| 6 | -1.85587388 | 2.01783402  | -2.57135730 |

6 2.92894934 -2.11323561 3.68426884  
6 4.41264209 -0.40218790 2.70709262  
6 4.84886897 1.71530233 0.85352083  
6 4.02218718 3.17781530 -0.95159519  
6 -4.00223865 -2.86372821 1.20037083  
6 -4.83051936 -1.39840121 -0.60826235  
6 -4.39648259 0.72987574 -2.45279384  
6 -2.91163439 2.43642218 -3.43457829  
6 2.70215434 -3.16146626 4.61886015  
6 4.18943974 -1.45612502 3.63527102  
6 5.06363534 2.77475021 -0.07078767  
6 -4.22286134 -3.90507950 2.14374711  
6 -5.04553725 -2.45040324 0.32544512  
6 -5.66222447 0.08236694 -2.39220087  
6 -4.17688029 1.79089625 -3.37490150  
6 -5.87864791 -0.97579164 -1.47192167  
6 -1.91414248 -3.66169308 2.96767093  
6 0.39743350 -3.41773734 3.79109050  
6 -3.18262933 -4.30433080 3.02237945  
6 -0.86942325 -4.06040923 3.84736206  
6 3.75961256 -3.55614629 5.51031143  
6 1.44086649 -3.81061619 4.67310555  
6 -5.50847926 -4.54723386 2.19872063  
6 -6.32669830 -3.09434761 0.39045147  
6 -7.15761435 -1.62972597 -1.40249667  
6 -7.35051674 -2.66195066 -0.48635687  
6 -6.51812459 -4.13454746 1.33135212  
6 -5.23663594 2.21092247 -4.24653705  
6 -6.71852115 0.50978972 -3.26925713  
6 -7.98577389 -0.16645940 -3.17977836  
6 -6.48661949 1.55104203 -4.16625998  
6 3.49710497 -4.62002577 6.44320722

|   |             |             |             |
|---|-------------|-------------|-------------|
| 6 | -8.19457752 | -1.18137194 | -2.29373584 |
| 1 | -8.79007835 | 0.15547278  | -3.84751903 |
| 6 | 1.20692654  | -4.86826399 | 5.61924587  |
| 6 | -1.09619889 | -5.11402177 | 4.79484450  |
| 6 | -3.40111279 | -5.35910023 | 3.97495751  |
| 6 | -5.69668179 | -5.60043373 | 3.16099338  |
| 6 | 4.23507439  | 4.23878538  | -1.87463768 |
| 6 | 1.93223494  | 3.98599920  | -2.70905534 |
| 6 | -0.37798796 | 3.73717048  | -3.53664438 |
| 6 | -2.69184134 | 3.50064723  | -4.35117969 |
| 6 | -4.99116149 | 3.26965090  | -5.15316725 |
| 6 | -3.75809361 | 3.91545307  | -5.22271340 |
| 6 | -1.42930275 | 4.14759920  | -4.40265140 |
| 6 | 0.88453790  | 4.39066351  | -3.58124986 |
| 6 | 5.51222184  | 4.89957120  | -1.91262494 |
| 6 | 3.19321064  | 4.64219708  | -2.75002256 |
| 6 | -4.69637189 | -5.98579359 | 4.00337005  |
| 6 | -0.03993498 | -5.48965637 | 5.65875815  |
| 6 | -2.36704273 | -5.73698041 | 4.82965813  |
| 6 | 2.28554557  | -5.24266549 | 6.49512735  |
| 1 | -7.29447899 | 1.87120664  | -4.83191663 |
| 1 | -5.79840121 | 3.58944502  | -5.81986553 |
| 6 | 4.98968433  | -2.90434244 | 5.44557919  |
| 6 | 5.23950562  | -1.85580649 | 4.52866865  |
| 6 | 5.67120840  | 0.25829280  | 2.66095140  |
| 6 | 5.88882840  | 1.31307665  | 1.73651096  |
| 6 | 6.33475488  | 3.43928448  | -0.11451101 |
| 6 | 6.52176771  | 4.49066845  | -1.04357944 |
| 6 | 7.35380053  | 3.01869751  | 0.77329509  |
| 6 | 7.16030199  | 1.98390668  | 1.68619778  |
| 6 | 6.71926853  | -0.15022380 | 3.55754930  |
| 6 | 6.48416901  | -1.18536909 | 4.46014922  |

|   |             |             |             |
|---|-------------|-------------|-------------|
| 6 | 7.98071933  | 0.53826945  | 3.48187498  |
| 6 | 8.18998616  | 1.55095360  | 2.59364680  |
| 6 | 5.69293426  | 5.96855147  | -2.85908713 |
| 6 | 3.40321543  | 5.71629385  | -3.68351920 |
| 6 | 1.10119593  | 5.46537305  | -4.50785956 |
| 6 | -1.20396855 | 5.22503214  | -5.32841227 |
| 6 | -3.50065279 | 4.99380866  | -6.14011985 |
| 6 | -2.28835027 | 5.61513780  | -6.19037404 |
| 6 | 2.36634058  | 6.09957744  | -4.53173128 |
| 6 | 0.04058043  | 5.85122694  | -5.36153918 |
| 6 | 4.69206851  | 6.35630529  | -3.69943452 |
| 1 | -2.11702020 | 6.43266745  | -6.89658799 |
| 1 | 0.20604419  | 6.67022313  | -6.06893111 |
| 1 | 2.53156342  | 6.91779207  | -5.24000950 |
| 1 | 4.85414489  | 7.17187099  | -4.41011124 |
| 1 | -4.30935866 | 5.30892515  | -6.80579922 |
| 1 | -4.86417608 | -6.78990895 | 4.72563304  |
| 1 | -2.53933146 | -6.54121210 | 5.55199436  |
| 1 | -0.21137090 | -6.29464371 | 6.38055871  |
| 1 | 2.11059843  | -6.04874134 | 7.21350632  |
| 1 | 8.77946115  | 0.22749577  | 4.16151585  |
| 1 | 7.28522087  | -1.49200187 | 5.14038735  |
| 1 | 5.79079249  | -3.20986780 | 6.12632629  |
| 1 | 4.30159665  | -4.92263783 | 7.11971706  |
| 1 | -6.67253207 | -6.09274410 | 3.20289007  |
| 1 | -7.49459221 | -4.62722007 | 1.37835842  |
| 1 | -8.32647857 | -3.15552073 | -0.43827338 |
| 1 | -9.16740148 | -1.67904184 | -2.24529515 |
| 1 | 9.15799548  | 2.05887124  | 2.55519653  |
| 1 | 8.32378705  | 3.52507329  | 0.73907284  |
| 1 | 7.49189277  | 4.99679699  | -1.07752627 |
| 1 | 6.66422185  | 6.47066544  | -2.89043558 |

|    |             |             |             |
|----|-------------|-------------|-------------|
| 42 | -0.47483926 | -2.06932331 | -1.46086830 |
| 6  | -0.36401919 | -3.97254986 | -1.23481983 |
| 6  | 1.24533166  | -2.14665511 | -2.31233429 |
| 6  | -1.25781674 | -2.39524418 | -3.18322060 |
| 8  | -1.75106590 | -2.58004416 | -4.22805656 |
| 8  | 2.29927110  | -2.17575784 | -2.81947993 |
| 8  | -0.30538660 | -5.13051199 | -1.07728599 |

**IIId-Mo**

|   |              |              |              |
|---|--------------|--------------|--------------|
| 6 | 0.717080270  | -0.508321600 | 1.037101490  |
| 6 | 0.915214490  | 0.551819970  | 0.106302190  |
| 6 | -0.147473350 | 0.950319060  | -0.754231630 |
| 6 | -1.404001080 | 0.284918680  | -0.688762050 |
| 6 | -1.598512260 | -0.780116510 | 0.235129380  |
| 6 | -0.538575080 | -1.175178300 | 1.099209360  |
| 6 | -0.735943470 | -2.234275580 | 2.026659830  |
| 6 | 1.771399710  | -0.897064200 | 1.906796550  |
| 6 | 2.170062880  | 1.213955710  | 0.039997280  |
| 6 | 0.043270430  | 2.018043450  | -1.672789400 |
| 6 | -2.466411390 | 0.685910160  | -1.543636520 |
| 6 | -2.852473520 | -1.446023990 | 0.298327950  |
| 6 | 1.571227920  | -1.954332060 | 2.838939090  |
| 6 | 3.026401280  | -0.225699490 | 1.848536710  |
| 6 | 2.360645480  | 2.270258830  | -0.894517250 |
| 6 | 3.228706490  | 0.823902070  | 0.915180860  |
| 6 | -1.024149980 | 2.424307980  | -2.523638840 |
| 6 | 1.300531260  | 2.681705950  | -1.739316300 |
| 6 | -1.991429820 | -2.903022640 | 2.086867250  |
| 6 | 0.320890260  | -2.623703130 | 2.896626470  |
| 6 | -3.047324890 | -2.510210000 | 1.223871980  |
| 6 | -3.914087680 | -1.047278050 | -0.562163710 |
| 6 | -3.721876490 | 0.018032950  | -1.480005960 |

|   |              |              |              |
|---|--------------|--------------|--------------|
| 6 | -2.275218110 | 1.758054830  | -2.460714420 |
| 6 | 2.627483370  | -2.340305700 | 3.717504760  |
| 6 | 4.079720570  | -0.608694160 | 2.733273060  |
| 6 | 4.488095240  | 1.489093860  | 0.863726420  |
| 6 | 3.625244710  | 2.937654900  | -0.962739690 |
| 6 | -4.305716210 | -3.179799320 | 1.285123410  |
| 6 | -5.172326880 | -1.717209110 | -0.499266410 |
| 6 | -4.788142080 | 0.421140930  | -2.338338100 |
| 6 | -3.344235990 | 2.163128370  | -3.315381460 |
| 6 | 2.425682070  | -3.397875310 | 4.646422450  |
| 6 | 3.877096980  | -1.664784230 | 3.664384410  |
| 6 | 4.695468830  | 2.543534920  | -0.081807100 |
| 6 | -4.498169460 | -4.242323990 | 2.210587260  |
| 6 | -5.364079600 | -2.782451960 | 0.422697190  |
| 6 | -6.040633900 | -0.249157700 | -2.274881630 |
| 6 | -4.596368060 | 1.492587470  | -3.253073340 |
| 6 | -6.232015360 | -1.315984160 | -1.358560850 |
| 6 | -2.188378760 | -3.966984380 | 3.016964810  |
| 6 | 0.121447490  | -3.685840050 | 3.828816220  |
| 6 | -3.442757730 | -4.634644180 | 3.074385180  |
| 6 | -1.131420850 | -4.35521910  | 3.884881500  |
| 6 | 3.494320200  | -3.780275700 | 5.530486570  |
| 6 | 1.176951610  | -4.070206720 | 4.700565990  |
| 6 | -5.769067200 | -4.913843600 | 2.265601300  |
| 6 | -6.629867510 | -3.456774330 | 0.484524700  |
| 6 | -7.497263020 | -1.996810890 | -1.290921610 |
| 6 | -7.666908840 | -3.039962960 | -0.383161020 |
| 6 | -6.794356680 | -4.512626660 | 1.412139240  |
| 6 | -5.670280220 | 1.898990990  | -4.114718980 |
| 6 | -7.110886250 | 0.162043080  | -3.143780410 |
| 6 | -8.364095820 | -0.539460880 | -3.054154780 |
| 6 | -6.905575800 | 1.213935900  | -4.033729780 |

|   |              |              |              |
|---|--------------|--------------|--------------|
| 6 | 3.256737360  | -4.856802910 | 6.455630540  |
| 6 | -8.547419360 | -1.564510930 | -2.174727270 |
| 1 | -9.177734750 | -0.228088980 | -3.715684590 |
| 6 | 0.969347680  | -5.141909070 | 5.637138770  |
| 6 | -1.330679100 | -5.425193750 | 4.821407160  |
| 6 | -3.633813450 | -5.707374250 | 4.013962060  |
| 6 | -5.928719150 | -5.984437240 | 3.213587350  |
| 6 | 3.816168410  | 4.015312510  | -1.888827550 |
| 6 | 1.487542440  | 3.764577740  | -2.656370790 |
| 6 | -0.836248100 | 3.503554340  | -3.438578030 |
| 6 | -3.153697770 | 3.237694790  | -4.226634150 |
| 6 | -5.454235270 | 2.970693540  | -5.012918050 |
| 6 | -4.235149580 | 3.640608480  | -5.085236510 |
| 6 | -1.903939710 | 3.907422950  | -4.286545130 |
| 6 | 0.416156200  | 4.173180080  | -3.499657460 |
| 6 | 5.094186090  | 4.692958880  | -1.955818230 |
| 6 | 2.735079090  | 4.431097140  | -2.729127660 |
| 6 | -4.915340010 | -6.361213050 | 4.043683990  |
| 6 | -0.263625700 | -5.789209590 | 5.676247850  |
| 6 | -2.587073220 | -6.075222220 | 4.856378830  |
| 6 | 2.058250420  | -5.503573310 | 6.505707950  |
| 1 | -7.723648190 | 1.523410040  | -4.692119710 |
| 1 | -6.273371610 | 3.280909060  | -5.669642450 |
| 6 | 4.710974600  | -3.105665660 | 5.467065180  |
| 6 | 4.936571770  | -2.048582510 | 4.553602470  |
| 6 | 5.327460090  | 0.068954670  | 2.685193320  |
| 6 | 5.529755670  | 1.121892240  | 1.752741440  |
| 6 | 5.959314170  | 3.237634280  | -0.114006110 |
| 6 | 6.154269240  | 4.246130920  | -1.124017860 |
| 6 | 6.982184310  | 2.834894300  | 0.778146810  |
| 6 | 6.792146700  | 1.812377630  | 1.703411740  |
| 6 | 6.382383830  | -0.317279250 | 3.582208090  |



|   |              |              |              |
|---|--------------|--------------|--------------|
| 6 | 6.167796160  | -1.355966860 | 4.485460380  |
| 6 | 7.631661640  | 0.392122940  | 3.506910810  |
| 6 | 7.826375790  | 1.403962850  | 2.614860370  |
| 6 | 5.239760520  | 5.775126120  | -2.898916620 |
| 6 | 2.915678830  | 5.525523620  | -3.638031860 |
| 6 | 0.601914630  | 5.262496390  | -4.415224010 |
| 6 | -1.708571420 | 4.997710670  | -5.204588470 |
| 6 | -4.008402860 | 4.733066430  | -5.994077750 |
| 6 | -2.809262740 | 5.377897400  | -6.050384440 |
| 6 | 1.856421750  | 5.914613880  | -4.454432200 |
| 6 | -0.476583830 | 5.644982370  | -5.248017120 |
| 6 | 4.202201280  | 6.175578450  | -3.682754940 |
| 1 | -2.660121260 | 6.205880490  | -6.749410220 |
| 1 | -0.332875590 | 6.474210120  | -5.947924280 |
| 1 | 1.997882500  | 6.745482330  | -5.152640840 |
| 1 | 4.335949120  | 7.001994930  | -4.386082080 |
| 1 | -4.830434440 | 5.039103490  | -6.647671940 |
| 1 | -5.064414870 | -7.178120980 | 4.755701090  |
| 1 | -2.737993320 | -6.891617950 | 5.569949410  |
| 1 | -0.415631880 | -6.604737670 | 6.390599340  |
| 1 | 1.901103580  | -6.319384980 | 7.217281730  |
| 1 | 8.434248640  | 0.096983790  | 4.188894350  |
| 1 | 6.975170310  | -1.647833940 | 5.164603680  |
| 1 | 5.520416280  | -3.399278780 | 6.143018280  |
| 1 | 4.069767180  | -5.148782570 | 7.126621060  |
| 1 | -6.894518210 | -6.496410980 | 3.255088050  |
| 1 | -7.759494960 | -5.027233740 | 1.458725520  |
| 1 | -8.631957250 | -3.554669700 | -0.335990710 |
| 1 | -9.509450940 | -2.082755030 | -2.124596860 |
| 1 | 8.786030670  | 1.926987030  | 2.573833350  |
| 1 | 7.947415960  | 3.348742490  | 0.734287980  |
| 1 | 7.122118540  | 4.751967140  | -1.180553480 |

|    |             |              |              |
|----|-------------|--------------|--------------|
| 1  | 6.212269880 | 6.270606340  | -2.964802240 |
| 42 | 5.605911490 | 2.360534070  | -2.420510840 |
| 6  | 5.438173280 | 0.400140610  | -2.508520600 |
| 6  | 7.463344200 | 2.133567370  | -2.948916090 |
| 6  | 5.221883250 | 2.409198290  | -4.330234100 |
| 8  | 4.987913400 | 2.474042010  | -5.470196860 |
| 8  | 8.584404360 | 2.022582640  | -3.253687650 |
| 8  | 5.343148990 | -0.759128530 | -2.531210750 |

**TS(IIId-e)-Mo**

|   |             |             |             |
|---|-------------|-------------|-------------|
| 6 | 0.67653784  | -0.54141920 | 1.08257870  |
| 6 | 0.88763275  | 0.50700613  | 0.14383698  |
| 6 | -0.16678220 | 0.90484725  | -0.72714082 |
| 6 | -1.42819807 | 0.24934982  | -0.66240794 |
| 6 | -1.63559683 | -0.80592659 | 0.27002396  |
| 6 | -0.58391088 | -1.19992751 | 1.14361212  |
| 6 | -0.79356585 | -2.24922721 | 2.07954206  |
| 6 | 1.72360355  | -0.92924498 | 1.96282325  |
| 6 | 2.14835483  | 1.16044759  | 0.07965855  |
| 6 | 0.03685141  | 1.96339542  | -1.65412595 |
| 6 | -2.48395233 | 0.65098683  | -1.52648358 |
| 6 | -2.89475193 | -1.46272281 | 0.33218433  |
| 6 | 1.51105715  | -1.97750719 | 2.90322070  |
| 6 | 2.98130854  | -0.26677144 | 1.90630300  |
| 6 | 2.35850390  | 2.20814316  | -0.86317265 |
| 6 | 3.19452548  | 0.77508096  | 0.96507559  |
| 6 | -1.02411326 | 2.37113017  | -2.51174359 |
| 6 | 1.30016995  | 2.61834241  | -1.72046767 |
| 6 | -2.05315881 | -2.90887499 | 2.13853581  |
| 6 | 0.25619319  | -2.63800046 | 2.95953169  |
| 6 | -3.10194904 | -2.51665576 | 1.26567260  |
| 6 | -3.94911723 | -1.06390723 | -0.53771928 |

|   |             |             |             |
|---|-------------|-------------|-------------|
| 6 | -3.74495257 | -0.00758764 | -1.46344552 |
| 6 | -2.28132465 | 1.71413840  | -2.44987074 |
| 6 | 2.55985430  | -2.36268669 | 3.79028288  |
| 6 | 4.02839373  | -0.65059206 | 2.79867110  |
| 6 | 4.45673545  | 1.43825608  | 0.91091470  |
| 6 | 3.62598507  | 2.85897881  | -0.92973955 |
| 6 | -4.36533082 | -3.17718618 | 1.32595078  |
| 6 | -5.21215098 | -1.72431683 | -0.47555348 |
| 6 | -4.80412798 | 0.39654831  | -2.32960146 |
| 6 | -3.34406839 | 2.12154263  | -3.31136857 |
| 6 | 2.34615507  | -3.41138018 | 4.72714331  |
| 6 | 3.81466971  | -1.69651638 | 3.73674542  |
| 6 | 4.67630353  | 2.47343040  | -0.03615229 |
| 6 | -4.57009499 | -4.23007282 | 2.25973757  |
| 6 | -5.41614296 | -2.78027940 | 0.45449927  |
| 6 | -6.06193159 | -0.26465222 | -2.26687246 |
| 6 | -4.60092809 | 1.46037344  | -3.25055143 |
| 6 | -6.26489485 | -1.32245742 | -1.34371704 |
| 6 | -2.26247850 | -3.96313493 | 3.07703816  |
| 6 | 0.04459243  | -3.69007929 | 3.89945524  |
| 6 | -3.52166172 | -4.62173074 | 3.13313133  |
| 6 | -1.21318729 | -4.35102020 | 3.95438707  |
| 6 | 3.40874150  | -3.79429935 | 5.61958190  |
| 6 | 1.09324308  | -4.07408311 | 4.78048431  |
| 6 | -5.84524497 | -4.89258155 | 2.31410540  |
| 6 | -6.68684712 | -3.44540193 | 0.51563742  |
| 6 | -7.53556463 | -1.99413893 | -1.27669723 |
| 6 | -7.71676770 | -3.02830711 | -0.36148401 |
| 6 | -6.86373536 | -4.49153348 | 1.45092983  |
| 6 | -5.66863583 | 1.86924589  | -4.11950019 |
| 6 | -7.12554221 | 0.14790350  | -3.14384833 |
| 6 | -8.38398928 | -0.54451861 | -3.05504106 |

|   |             |             |             |
|---|-------------|-------------|-------------|
| 6 | -6.90936535 | 1.19221828  | -4.03955512 |
| 6 | 3.15862151  | -4.86108926 | 6.55283492  |
| 6 | -8.57852728 | -1.56162201 | -2.16894111 |
| 1 | -9.19232202 | -0.23252490 | -3.72269229 |
| 6 | 0.87303769  | -5.13677248 | 5.72535773  |
| 6 | -1.42483149 | -5.41103699 | 4.89908071  |
| 6 | -3.72534340 | -5.68416906 | 4.08047476  |
| 6 | -6.01763603 | -5.95346385 | 3.27030316  |
| 6 | 3.81932784  | 3.93019112  | -1.85783932 |
| 6 | 1.49580885  | 3.69039651  | -2.64065583 |
| 6 | -0.82575084 | 3.44401503  | -3.43058786 |
| 6 | -3.14285920 | 3.19044800  | -4.22708084 |
| 6 | -5.44222674 | 2.93415128  | -5.02168462 |
| 6 | -4.21756527 | 3.59689341  | -5.09171006 |
| 6 | -1.88861022 | 3.85230569  | -4.28447173 |
| 6 | 0.43028012  | 4.10449878  | -3.48899964 |
| 6 | 5.10967499  | 4.59488422  | -1.92211253 |
| 6 | 2.75386355  | 4.34939738  | -2.70605370 |
| 6 | -5.01086553 | -6.32931343 | 4.10927325  |
| 6 | -0.36406125 | -5.77492937 | 5.76342321  |
| 6 | -2.68515048 | -6.05188057 | 4.93265750  |
| 6 | 1.95527603  | -5.49855429 | 6.60262057  |
| 1 | -7.72239841 | 1.50300847  | -4.70347006 |
| 1 | -6.25628162 | 3.24675149  | -5.68349142 |
| 6 | 4.63042742  | -3.13042908 | 5.55512031  |
| 6 | 4.86887651  | -2.08214873 | 4.63280456  |
| 6 | 5.28259031  | 0.01553868  | 2.74602532  |
| 6 | 5.49709443  | 1.05737713  | 1.80522289  |
| 6 | 5.95241304  | 3.12570661  | -0.09772131 |
| 6 | 6.17426937  | 4.11236817  | -1.11761703 |
| 6 | 6.96031773  | 2.74186584  | 0.80111439  |
| 6 | 6.76196294  | 1.72873939  | 1.74625243  |

|   |             |             |             |
|---|-------------|-------------|-------------|
| 6 | 6.33222124  | -0.37286888 | 3.64737134  |
| 6 | 6.10514552  | -1.40285948 | 4.56148148  |
| 6 | 7.58687640  | 0.32137530  | 3.56578165  |
| 6 | 7.79157239  | 1.32212532  | 2.66049423  |
| 6 | 5.26885346  | 5.66374923  | -2.88180760 |
| 6 | 2.94045699  | 5.44537006  | -3.62232562 |
| 6 | 0.62476529  | 5.19250961  | -4.40374442 |
| 6 | -1.68347743 | 4.93787706  | -5.20314517 |
| 6 | -3.98035347 | 4.68399923  | -6.00262664 |
| 6 | -2.77642142 | 5.32224199  | -6.05486160 |
| 6 | 1.88539150  | 5.83825771  | -4.43814027 |
| 6 | -0.44535374 | 5.57962237  | -5.24047220 |
| 6 | 4.23290737  | 6.07403118  | -3.67523299 |
| 1 | -2.61944158 | 6.14746494  | -6.75539354 |
| 1 | -0.29462570 | 6.40784452  | -5.94016272 |
| 1 | 2.03316949  | 6.66746473  | -5.13716118 |
| 1 | 4.38623257  | 6.88533074  | -4.39193866 |
| 1 | -4.79718769 | 4.99307382  | -6.66121630 |
| 1 | -5.16589846 | -7.13853203 | 4.82874784  |
| 1 | -2.84606539 | -6.86094114 | 5.65235357  |
| 1 | -0.52556825 | -6.58315206 | 6.48393059  |
| 1 | 1.78869430  | -6.30694647 | 7.32044467  |
| 1 | 8.38717821  | 0.02564264  | 4.25021433  |
| 1 | 6.90904158  | -1.69631389 | 5.24413395  |
| 1 | 5.43507428  | -3.42492475 | 6.23643323  |
| 1 | 3.96620057  | -5.15328093 | 7.23026278  |
| 1 | -6.98696528 | -6.45867709 | 3.31117248  |
| 1 | -7.83259965 | -4.99913455 | 1.49692081  |
| 1 | -8.68561732 | -3.53589781 | -0.31489050 |
| 1 | -9.54429478 | -2.07286094 | -2.11950190 |
| 1 | 8.75716609  | 1.83323616  | 2.61189063  |
| 1 | 7.93541523  | 3.23541245  | 0.74590069  |

|    |            |            |             |
|----|------------|------------|-------------|
| 1  | 7.13435928 | 4.63619365 | -1.14219595 |
| 1  | 6.24775857 | 6.14608668 | -2.95085542 |
| 42 | 5.81738943 | 2.79590332 | -3.22768642 |
| 8  | 5.37940485 | 1.42289072 | -4.55832971 |
| 8  | 7.29459336 | 1.70647857 | -2.67068391 |
| 8  | 7.02186001 | 3.53608397 | -4.50629098 |
| 8  | 7.76132783 | 4.00455555 | -5.28578420 |
| 8  | 8.20288792 | 1.06801451 | -2.30538905 |
| 8  | 5.11316568 | 0.60032776 | -5.34016874 |

### Ille-Mo

|   |             |             |             |
|---|-------------|-------------|-------------|
| 6 | 0.73518372  | -0.58742580 | 1.16156102  |
| 6 | 0.95587832  | 0.46458799  | 0.22776612  |
| 6 | -0.08831567 | 0.86696453  | -0.64951383 |
| 6 | -1.35432485 | 0.21773826  | -0.59395161 |
| 6 | -1.57337736 | -0.83658000 | 0.33611972  |
| 6 | -0.52861583 | -1.23917185 | 1.21389026  |
| 6 | -0.74851955 | -2.29095962 | 2.14496295  |
| 6 | 1.77614355  | -0.98567837 | 2.04348276  |
| 6 | 2.21962589  | 1.11597001  | 0.17559323  |
| 6 | 0.13033458  | 1.92102743  | -1.57968653 |
| 6 | -2.40082529 | 0.62379621  | -1.46574640 |
| 6 | -2.83692360 | -1.48622048 | 0.39036664  |
| 6 | 1.55480037  | -2.03750604 | 2.97624692  |
| 6 | 3.03891015  | -0.32936406 | 1.99534711  |
| 6 | 2.44089057  | 2.16484994  | -0.76002701 |
| 6 | 3.26015700  | 0.71905241  | 1.06385389  |
| 6 | -0.92131389 | 2.33023096  | -2.44908192 |
| 6 | 1.39667017  | 2.56723017  | -1.63730896 |
| 6 | -2.01315914 | -2.94281653 | 2.19666798  |
| 6 | 0.29496739  | -2.69027044 | 3.02573461  |
| 6 | -3.05533332 | -2.54124591 | 1.32107787  |

|   |             |             |             |
|---|-------------|-------------|-------------|
| 6 | -3.88294770 | -1.08045268 | -0.48435103 |
| 6 | -3.66578770 | -0.02593514 | -1.40981649 |
| 6 | -2.18371475 | 1.68298910  | -2.39233805 |
| 6 | 2.59930519  | -2.43528884 | 3.86308951  |
| 6 | 4.08060948  | -0.72541555 | 2.88551146  |
| 6 | 4.52364928  | 1.37869457  | 1.02164021  |
| 6 | 3.71248089  | 2.81382926  | -0.80599373 |
| 6 | -4.32297059 | -3.19351620 | 1.37416905  |
| 6 | -5.15100693 | -1.73278663 | -0.42945440 |
| 6 | -4.71676988 | 0.38367048  | -2.28352791 |
| 6 | -3.23674725 | 2.09410459  | -3.26210815 |
| 6 | 2.37647340  | -3.48789860 | 4.79330419  |
| 6 | 3.85858084  | -1.77780660 | 3.81591948  |
| 6 | 4.74412614  | 2.42906696  | 0.08794108  |
| 6 | -4.53868462 | -4.24750265 | 2.30458533  |
| 6 | -5.36693753 | -2.78792452 | 0.49847980  |
| 6 | -5.97960660 | -0.26827478 | -2.22715499 |
| 6 | -4.49973393 | 1.44275166  | -3.20630987 |
| 6 | -6.19573078 | -1.32417164 | -1.30329919 |
| 6 | -2.23272079 | -3.99889577 | 3.13032437  |
| 6 | 0.07375642  | -3.74589767 | 3.96018000  |
| 6 | -3.49688044 | -4.64891078 | 3.17988146  |
| 6 | -1.18863739 | -4.39781658 | 4.00894018  |
| 6 | 3.43360891  | -3.88357429 | 5.68401658  |
| 6 | 1.11747381  | -4.14194458 | 4.84099732  |
| 6 | -5.81950048 | -4.90138537 | 2.35184021  |
| 6 | -6.64266522 | -3.44453749 | 0.55242342  |
| 6 | -7.47088828 | -1.98640151 | -1.24338269 |
| 6 | -7.66440528 | -3.02012764 | -0.32857338 |
| 6 | -6.83069179 | -4.49170732 | 1.48608170  |
| 6 | -5.55838076 | 1.85582825  | -4.08326503 |
| 6 | -7.03419734 | 0.14967094  | -3.11067992 |

|   |             |             |             |
|---|-------------|-------------|-------------|
| 6 | -8.29808123 | -0.53248710 | -3.02808504 |
| 6 | -6.80372199 | 1.19051136  | -4.00893129 |
| 6 | 3.17452742  | -4.95282034 | 6.61091578  |
| 6 | -8.50537452 | -1.54712570 | -2.14146146 |
| 1 | -9.10024187 | -0.21556895 | -3.70084048 |
| 6 | 0.88812160  | -5.20707194 | 5.77964448  |
| 6 | -1.41018028 | -5.46057090 | 4.94862421  |
| 6 | -3.71081799 | -5.71384228 | 4.12351129  |
| 6 | -6.00261553 | -5.96399286 | 3.30502009  |
| 6 | 3.93496301  | 3.86729595  | -1.74471388 |
| 6 | 1.60810558  | 3.62471602  | -2.57390872 |
| 6 | -0.70820277 | 3.39461374  | -3.37372263 |
| 6 | -3.02036856 | 3.15625907  | -4.18295920 |
| 6 | -5.31632478 | 2.91540876  | -4.99076182 |
| 6 | -4.08744641 | 3.56572426  | -5.05739928 |
| 6 | -1.76101696 | 3.80531282  | -4.23717254 |
| 6 | 0.55706827  | 4.04243774  | -3.42962922 |
| 6 | 5.21829528  | 4.53632698  | -1.77336232 |
| 6 | 2.87909622  | 4.27416282  | -2.63178795 |
| 6 | -5.00174632 | -6.34961862 | 4.14593136  |
| 6 | -0.35523264 | -5.83628501 | 5.81242967  |
| 6 | -2.67662259 | -6.09223058 | 4.97623733  |
| 6 | 1.96571891  | -5.58155041 | 6.65613099  |
| 1 | -7.61021960 | 1.50522353  | -4.67898409 |
| 1 | -6.12375143 | 3.23038688  | -5.65958065 |
| 6 | 4.66202300  | -3.22726865 | 5.62414905  |
| 6 | 4.90806721  | -2.17697347 | 4.71015570  |
| 6 | 5.33946933  | -0.06493949 | 2.84047209  |
| 6 | 5.55942178  | 0.98458980  | 1.91295858  |
| 6 | 6.01828483  | 3.09614894  | 0.05033776  |
| 6 | 6.22212727  | 4.12896293  | -0.88336865 |
| 6 | 7.03197118  | 2.68372905  | 0.95046208  |



|   |             |             |             |
|---|-------------|-------------|-------------|
| 6 | 6.83238806  | 1.65654604  | 1.86605258  |
| 6 | 6.38584670  | -0.46978009 | 3.74166876  |
| 6 | 6.15173664  | -1.50334384 | 4.64412562  |
| 6 | 7.64710019  | 0.22000568  | 3.66987468  |
| 6 | 7.85911790  | 1.22951480  | 2.78001397  |
| 6 | 5.43012621  | 5.55350057  | -2.78215563 |
| 6 | 3.08215375  | 5.35953979  | -3.56780213 |
| 6 | 0.76822638  | 5.11909836  | -4.36026119 |
| 6 | -1.53928727 | 4.88232807  | -5.16725975 |
| 6 | -3.83482890 | 4.64416503  | -5.97656069 |
| 6 | -2.62560906 | 5.26946548  | -6.02858144 |
| 6 | 2.02751789  | 5.74523744  | -4.40725534 |
| 6 | -0.29841746 | 5.50828551  | -5.20799379 |
| 6 | 4.40237629  | 5.94959198  | -3.64556087 |
| 1 | -2.45622863 | 6.08618263  | -6.73609710 |
| 1 | -0.13355797 | 6.32460575  | -5.91819478 |
| 1 | 2.19296717  | 6.55708048  | -5.12208428 |
| 1 | 4.57722926  | 6.74877227  | -4.36993545 |
| 1 | -4.64545939 | 4.95479904  | -6.64206898 |
| 1 | -5.16499168 | -7.15993198 | 4.86236616  |
| 1 | -2.84506240 | -6.90292468 | 5.69240813  |
| 1 | -0.52401495 | -6.64666102 | 6.52888361  |
| 1 | 1.79221324  | -6.39222759 | 7.36972606  |
| 1 | 8.44293216  | -0.08834040 | 4.35404633  |
| 1 | 6.95212388  | -1.80784208 | 5.32612943  |
| 1 | 5.46333084  | -3.53202324 | 6.30494550  |
| 1 | 3.97884830  | -5.25485204 | 7.28792699  |
| 1 | -6.97573049 | -6.46227633 | 3.34101525  |
| 1 | -7.80331232 | -4.99257316 | 1.52657980  |
| 1 | -8.63711608 | -3.52078697 | -0.28761238 |
| 1 | -9.47524345 | -2.05101135 | -2.09702722 |
| 1 | 8.82634860  | 1.73880346  | 2.74278649  |

|    |            |            |             |
|----|------------|------------|-------------|
| 1  | 8.00183229 | 3.18985796 | 0.91657299  |
| 1  | 7.19426237 | 4.62997507 | -0.92049025 |
| 1  | 6.40497298 | 6.04433193 | -2.83455790 |
| 42 | 4.89329452 | 3.68629858 | -4.13456464 |
| 8  | 4.48995349 | 1.78748680 | -4.52810513 |
| 8  | 6.76722384 | 3.28367027 | -4.41967091 |
| 8  | 4.83944636 | 4.02846584 | -6.04109618 |
| 8  | 4.80479185 | 4.26236484 | -7.18458443 |
| 8  | 7.90328664 | 3.06543042 | -4.57838185 |
| 8  | 4.24860530 | 0.67306454 | -4.75395663 |

### IIIa-W

|   |             |             |             |
|---|-------------|-------------|-------------|
| 6 | 1.03010600  | -0.35871870 | 0.93701762  |
| 6 | 1.25310348  | 0.70446929  | 0.00419584  |
| 6 | 0.19730832  | 1.11732821  | -0.88338280 |
| 6 | -1.07466354 | 0.46150315  | -0.83601455 |
| 6 | -1.29938046 | -0.60766404 | 0.10171401  |
| 6 | -0.24905450 | -1.01786345 | 0.98421644  |
| 6 | -0.48152827 | -2.05962506 | 1.93571276  |
| 6 | 2.06834967  | -0.74713973 | 1.83963882  |
| 6 | 2.51369847  | 1.37891162  | -0.02227786 |
| 6 | 0.40990241  | 2.19981214  | -1.79255779 |
| 6 | -2.13246027 | 0.89120469  | -1.69686750 |
| 6 | -2.57901533 | -1.24118816 | 0.17054856  |
| 6 | 1.82677511  | -1.78680587 | 2.77611036  |
| 6 | 3.31512858  | -0.07712760 | 1.80084098  |
| 6 | 2.71366420  | 2.44975731  | -0.93291299 |
| 6 | 3.53704264  | 0.98300887  | 0.87251955  |
| 6 | -0.64221589 | 2.61342098  | -2.64513505 |
| 6 | 1.66800839  | 2.85783430  | -1.81297755 |
| 6 | -1.75100033 | -2.68405277 | 1.99218791  |
| 6 | 0.55923435  | -2.43909943 | 2.82384888  |

6 -2.79684844 -2.27610313 1.11204422  
6 -3.61959848 -0.80903473 -0.69355076  
6 -3.39756054 0.25100835 -1.62168711  
6 -1.90983684 1.96091660 -2.59731086  
6 2.86196516 -2.17442017 3.67482980  
6 4.35085551 -0.46538201 2.70126377  
6 4.79476470 1.65519136 0.84483626  
6 3.97031946 3.12045179 -0.96034982  
6 -4.07357871 -2.90821924 1.17995203  
6 -4.89446921 -1.44122127 -0.62546884  
6 -4.45081771 0.67810164 -2.48076113  
6 -2.96491096 2.38835732 -3.45670929  
6 2.62869301 -3.21874001 4.61377599  
6 4.12222614 -1.51517470 3.63186599  
6 5.00835683 2.71827530 -0.07413895  
6 -4.29636529 -3.95077037 2.12190240  
6 -5.11626524 -2.49167171 0.30836842  
6 -5.72072900 0.03818342 -2.41433753  
6 -4.22988390 1.74280584 -3.39849072  
6 -5.94144357 -1.01620722 -1.49138819  
6 -1.98197984 -3.72411857 2.94054363  
6 0.32801069 -3.47836350 3.77054441  
6 -3.25468778 -4.35706790 2.99875046  
6 -0.94070055 -4.12043479 3.82312271  
6 3.68102464 -3.60741830 5.51423060  
6 1.36803087 -3.86740107 4.66139897  
6 -5.58435822 -4.58607744 2.18031459  
6 -6.40117227 -3.13014063 0.37493138  
6 -7.22416783 -1.66330846 -1.41965022  
6 -7.42336041 -2.69308957 -0.50174440  
6 -6.59615372 -4.16832405 1.31521088  
6 -5.29152245 2.17144861 -4.26589405

6 -6.77718669 0.47214535 -3.28888310  
6 -8.04760189 -0.19743187 -3.19752184  
6 -6.54277234 1.51409505 -4.18446029  
6 3.41267698 -4.66789084 6.44912705  
6 -8.25971981 -1.21084471 -2.31046665  
1 -8.85143272 0.12860580 -3.86391309  
6 1.12782092 -4.92116445 5.61069828  
6 -1.17247385 -5.16971988 4.77628106  
6 -3.47750771 -5.40786887 3.95381480  
6 -5.77519099 -5.63756638 3.14327313  
6 4.17984745 4.19222249 -1.87358581  
6 1.87991579 3.93596396 -2.71977388  
6 -0.42946143 3.69317394 -3.55239090  
6 -2.74511463 3.46042295 -4.36564022  
6 -5.04661111 3.23497432 -5.16524847  
6 -3.81204093 3.88153903 -5.23184469  
6 -1.48238654 4.11024989 -4.41332847  
6 0.83173914 4.34764958 -3.58957287  
6 5.45337745 4.86062795 -1.89832080  
6 3.13991036 4.59793033 -2.74892978  
6 -4.77532893 -6.02755809 3.98495708  
6 -0.11952850 -5.54206378 5.64635911  
6 -2.44390285 -5.78794762 4.81046296  
6 2.20102885 -5.29133389 6.49491170  
1 -7.35175903 1.83883479 -4.84670804  
1 -5.85474436 3.56105481 -5.82781562  
6 4.91066412 -2.95373665 5.45628335  
6 5.16624081 -1.90798382 4.53676402  
6 5.60634471 0.20257659 2.66395049  
6 5.82738498 1.25872204 1.73943225  
6 6.27585979 3.39337082 -0.10386639  
6 6.46058003 4.45162686 -1.02600795

|    |             |             |             |
|----|-------------|-------------|-------------|
| 6  | 7.28873152  | 2.97675509  | 0.79079981  |
| 6  | 7.09360655  | 1.93784951  | 1.70143019  |
| 6  | 6.64651631  | -0.19829792 | 3.57130441  |
| 6  | 6.40759973  | -1.23322793 | 4.47601214  |
| 6  | 7.90411658  | 0.49704510  | 3.50593472  |
| 6  | 8.11629208  | 1.51083325  | 2.61854201  |
| 6  | 5.63255712  | 5.93827474  | -2.83491409 |
| 6  | 3.34719520  | 5.68229584  | -3.67114292 |
| 6  | 1.04680104  | 5.43326609  | -4.50515242 |
| 6  | -1.25807918 | 5.19585163  | -5.32826299 |
| 6  | -3.55555903 | 4.96745332  | -6.13977085 |
| 6  | -2.34349431 | 5.59119539  | -6.18553256 |
| 6  | 2.31103388  | 6.07042060  | -4.51872911 |
| 6  | -0.01318938 | 5.82527703  | -5.35527265 |
| 6  | 4.63305057  | 6.32820118  | -3.67622924 |
| 1  | -2.17797730 | 6.41498595  | -6.88586847 |
| 1  | 0.15053921  | 6.65150028  | -6.05451999 |
| 1  | 2.47610710  | 6.89652887  | -5.21785063 |
| 1  | 4.79411439  | 7.15082487  | -4.37898727 |
| 1  | -4.36281486 | 5.29061604  | -6.80339717 |
| 1  | -4.95007968 | -6.82973132 | 4.70778224  |
| 1  | -2.62071996 | -6.58888633 | 5.53547034  |
| 1  | -0.29475473 | -6.34312969 | 6.37166983  |
| 1  | 2.02176687  | -6.09467464 | 7.21534927  |
| 1  | 8.70050608  | 0.19462854  | 4.19208756  |
| 1  | 7.20431397  | -1.53321319 | 5.16423742  |
| 1  | 5.70676989  | -3.25490745 | 6.14475040  |
| 1  | 4.21247457  | -4.96745985 | 7.13257599  |
| 74 | 0.60140075  | -1.26445582 | -1.30041491 |
| 6  | 1.47203885  | -2.98005622 | -0.96730525 |
| 6  | 1.92738774  | -0.97545096 | -2.70410376 |
| 6  | -0.47676145 | -2.18321200 | -2.64418299 |

|   |             |             |             |
|---|-------------|-------------|-------------|
| 8 | -1.15474808 | -2.71274189 | -3.43380649 |
| 8 | 2.72492064  | -0.76345531 | -3.53028494 |
| 8 | 1.99032157  | -3.99862420 | -0.72756667 |
| 1 | -6.75242654 | -6.12671599 | 3.19060459  |
| 1 | -7.57468871 | -4.65654094 | 1.36533647  |
| 1 | -8.40223287 | -3.18083136 | -0.45282489 |
| 1 | -9.23495598 | -1.70368846 | -2.26007126 |
| 1 | 9.08297228  | 2.02205308  | 2.59247508  |
| 1 | 8.25556925  | 3.48967353  | 0.76750831  |
| 1 | 7.42704503  | 4.96526442  | -1.05068986 |
| 1 | 6.60126716  | 6.44581427  | -2.85785612 |

**IIIb-W**

|   |              |              |              |
|---|--------------|--------------|--------------|
| 6 | 1.111662580  | -0.249532050 | 0.891853540  |
| 6 | 1.312689760  | 0.833316390  | -0.003781480 |
| 6 | 0.264796670  | 1.253575760  | -0.880824000 |
| 6 | -0.992229700 | 0.594281250  | -0.869357410 |
| 6 | -1.205336400 | -0.502010040 | 0.025561180  |
| 6 | -0.149706430 | -0.924670780 | 0.909988580  |
| 6 | -0.372191360 | -2.000944120 | 1.826277810  |
| 6 | 2.134365180  | -0.655400560 | 1.780961270  |
| 6 | 2.563652190  | 1.503466150  | -0.021183850 |
| 6 | 0.476085330  | 2.340971020  | -1.768178760 |
| 6 | -2.043024040 | 1.020318830  | -1.715132240 |
| 6 | -2.477471970 | -1.155781260 | 0.065219160  |
| 6 | 1.911288390  | -1.730978830 | 2.696367290  |
| 6 | 3.388369610  | 0.016411600  | 1.762646950  |
| 6 | 2.775736000  | 2.589620840  | -0.918651520 |
| 6 | 3.603159500  | 1.090782790  | 0.860646140  |
| 6 | -0.572310270 | 2.765957650  | -2.633479910 |
| 6 | 1.735500340  | 3.006973380  | -1.789102390 |
| 6 | -1.651824230 | -2.662308020 | 1.863315060  |

|   |              |              |              |
|---|--------------|--------------|--------------|
| 6 | 0.668038000  | -2.401012110 | 2.724510750  |
| 6 | -2.699382420 | -2.242401140 | 0.985169430  |
| 6 | -3.534643930 | -0.714849150 | -0.792649870 |
| 6 | -3.313377370 | 0.365106140  | -1.676047670 |
| 6 | -1.830528240 | 2.110218490  | -2.604742210 |
| 6 | 2.948248200  | -2.130313210 | 3.590603250  |
| 6 | 4.426062380  | -0.390832230 | 2.653573250  |
| 6 | 4.861424570  | 1.763640640  | 0.840901510  |
| 6 | 4.034867180  | 3.258849700  | -0.937982140 |
| 6 | -3.983850640 | -2.879365010 | 1.044176590  |
| 6 | -4.802213620 | -1.359642850 | -0.729055080 |
| 6 | -4.366868490 | 0.804404570  | -2.531225930 |
| 6 | -2.884651160 | 2.542289130  | -3.464131830 |
| 6 | 2.719361990  | -3.194197980 | 4.505281820  |
| 6 | 4.203515290  | -1.461955810 | 3.563732560  |
| 6 | 5.074417730  | 2.843184440  | -0.059828150 |
| 6 | -4.199337580 | -3.927195330 | 1.971035550  |
| 6 | -5.022128630 | -2.435558080 | 0.185582280  |
| 6 | -5.630890370 | 0.155720860  | -2.483054070 |
| 6 | -4.148229690 | 1.888781090  | -3.425333160 |
| 6 | -5.849247750 | -0.921044350 | -1.581802360 |
| 6 | -1.883668980 | -3.721542720 | 2.802767160  |
| 6 | 0.427088080  | -3.457408860 | 3.647661120  |
| 6 | -3.152979380 | -4.346736200 | 2.847275850  |
| 6 | -0.842953280 | -4.111876820 | 3.684104370  |
| 6 | 3.770574700  | -3.593932550 | 5.402158720  |
| 6 | 1.460968980  | -3.853563170 | 4.536536800  |
| 6 | -5.487108420 | -4.563088590 | 2.022054480  |
| 6 | -6.304830180 | -3.074764410 | 0.241835560  |
| 6 | -7.131249170 | -1.574223060 | -1.523510210 |
| 6 | -7.328813010 | -2.620925020 | -0.626954840 |
| 6 | -6.498024970 | -4.131551800 | 1.164022370  |

|   |              |              |              |
|---|--------------|--------------|--------------|
| 6 | -5.207330310 | 2.326349050  | -4.288522930 |
| 6 | -6.688029250 | 0.601794910  | -3.350564650 |
| 6 | -7.956341170 | -0.075631210 | -3.273873720 |
| 6 | -6.456443700 | 1.661505640  | -4.224383720 |
| 6 | 3.503984000  | -4.672970000 | 6.317571500  |
| 6 | -8.166912580 | -1.106392550 | -2.407375910 |
| 1 | -8.760358180 | 0.260276630  | -3.935140590 |
| 6 | 1.222361030  | -4.925127150 | 5.468403950  |
| 6 | -1.073646660 | -5.172981910 | 4.620952500  |
| 6 | -3.376935450 | -5.409227670 | 3.788743980  |
| 6 | -5.675374500 | -5.629495970 | 2.971465270  |
| 6 | 4.245766070  | 4.342021350  | -1.835116220 |
| 6 | 1.947488100  | 4.096391840  | -2.684593240 |
| 6 | -0.358358160 | 3.857978130  | -3.526888110 |
| 6 | -2.667651940 | 3.628083260  | -4.354885570 |
| 6 | -4.963913590 | 3.406902640  | -5.169592740 |
| 6 | -3.733012910 | 4.058439400  | -5.220352950 |
| 6 | -1.407445430 | 4.283277270  | -4.387087630 |
| 6 | 0.901089130  | 4.517684470  | -3.551858110 |
| 6 | 5.519413420  | 5.011299060  | -1.851538130 |
| 6 | 3.205458340  | 4.759447580  | -2.705562050 |
| 6 | -4.676233920 | -6.030140350 | 3.807982050  |
| 6 | -0.020411630 | -5.552445960 | 5.490494710  |
| 6 | -2.344191950 | -5.797454940 | 4.641550860  |
| 6 | 2.296021910  | -5.303393440 | 6.349813280  |
| 1 | -7.264476580 | 1.995689610  | -4.883053080 |
| 1 | -5.770891890 | 3.739836110  | -5.830199910 |
| 6 | 4.996016650  | -2.933166640 | 5.359630000  |
| 6 | 5.247338330  | -1.868125390 | 4.460231720  |
| 6 | 5.679063700  | 0.279134560  | 2.629470520  |
| 6 | 5.896578460  | 1.352636370  | 1.724622040  |
| 6 | 6.341059430  | 3.517610150  | -0.080724770 |



|   |              |              |              |
|---|--------------|--------------|--------------|
| 6 | 6.526426960  | 4.590135640  | -0.986351280 |
| 6 | 7.356379250  | 3.086707450  | 0.805722590  |
| 6 | 7.163044330  | 2.033204400  | 1.697431350  |
| 6 | 6.722328420  | -0.136626050 | 3.528354560  |
| 6 | 6.487460860  | -1.187692690 | 4.412842250  |
| 6 | 7.979422720  | 0.562109330  | 3.474571480  |
| 6 | 8.188497340  | 1.591333230  | 2.605610980  |
| 6 | 5.698484400  | 6.102462010  | -2.772956200 |
| 6 | 3.413754110  | 5.856222890  | -3.613356360 |
| 6 | 1.116121490  | 5.614151860  | -4.452526710 |
| 6 | -1.184132270 | 5.382544180  | -5.286878120 |
| 6 | -3.477285490 | 5.159154620  | -6.111662990 |
| 6 | -2.267811670 | 5.787057090  | -6.143379750 |
| 6 | 2.379047080  | 6.254311240  | -4.456509850 |
| 6 | 0.057473860  | 6.015447850  | -5.301373630 |
| 6 | 4.699415050  | 6.503339920  | -3.608909970 |
| 1 | -2.098293800 | 6.621714710  | -6.829796070 |
| 1 | 0.221834470  | 6.851365680  | -5.988922220 |
| 1 | 2.543366240  | 7.089676860  | -5.144755730 |
| 1 | 4.859860280  | 7.335848290  | -4.300091840 |
| 1 | -4.285439540 | 5.486195480  | -6.772304090 |
| 1 | -4.848427040 | -6.842172150 | 4.520283510  |
| 1 | -2.519519640 | -6.609057450 | 5.354758600  |
| 1 | -0.194345830 | -6.365099660 | 6.202974200  |
| 1 | 2.119560310  | -6.119741050 | 7.056128280  |
| 1 | 8.774813800  | 0.245687750  | 4.155559940  |
| 1 | 7.285211030  | -1.498675830 | 5.095009050  |
| 1 | 5.792645270  | -3.242836190 | 6.043689430  |
| 1 | 4.303348670  | -4.980269570 | 6.998117350  |
| 1 | -6.653051710 | -6.118495690 | 3.009435430  |
| 1 | -7.476157510 | -4.621125130 | 1.205066130  |
| 1 | -8.306815770 | -3.111062690 | -0.587398030 |

|    |              |              |              |
|----|--------------|--------------|--------------|
| 1  | -9.140692850 | -1.603074640 | -2.368609250 |
| 1  | 9.153038600  | 2.106851810  | 2.584176140  |
| 1  | 8.322813710  | 3.600733940  | 0.789193530  |
| 1  | 7.493221440  | 5.103500740  | -1.003170820 |
| 1  | 6.666942820  | 6.610800270  | -2.787974690 |
| 74 | -0.806295840 | -2.874237620 | -0.413966420 |
| 6  | 0.093761340  | -4.579901480 | -0.096218890 |
| 6  | 0.488388880  | -2.566505160 | -1.848105660 |
| 6  | -1.899900180 | -3.815172010 | -1.732868850 |
| 8  | -2.586452480 | -4.359765250 | -2.503956340 |
| 8  | 1.264514940  | -2.344825350 | -2.690941820 |
| 8  | 0.626964200  | -5.592291030 | 0.134631120  |

### TS(III)-W

|   |             |             |             |
|---|-------------|-------------|-------------|
| 6 | 1.05392509  | -0.27695144 | 0.98354528  |
| 6 | 1.26464345  | 0.79800678  | 0.06718292  |
| 6 | 0.22427440  | 1.19041765  | -0.82908933 |
| 6 | -1.05117519 | 0.54812991  | -0.77871912 |
| 6 | -1.26976563 | -0.51061203 | 0.16785839  |
| 6 | -0.21487358 | -0.93097330 | 1.04830519  |
| 6 | -0.44379234 | -1.98119186 | 1.98317054  |
| 6 | 2.09069919  | -0.67463957 | 1.87073982  |
| 6 | 2.51936823  | 1.44925446  | 0.02010143  |
| 6 | 0.43448397  | 2.25468191  | -1.74746086 |
| 6 | -2.10504999 | 0.95706792  | -1.64562355 |
| 6 | -2.52307618 | -1.20426672 | 0.17992858  |
| 6 | 1.86144611  | -1.71980727 | 2.80778441  |
| 6 | 3.34989014  | -0.01332433 | 1.82294728  |
| 6 | 2.73678845  | 2.50745260  | -0.91039689 |
| 6 | 3.56525515  | 1.04216596  | 0.89946048  |
| 6 | -0.61869099 | 2.66679474  | -2.61000412 |
| 6 | 1.69700368  | 2.91011258  | -1.78789372 |

|   |             |             |             |
|---|-------------|-------------|-------------|
| 6 | -1.71296516 | -2.62563571 | 2.03326386  |
| 6 | 0.59864687  | -2.37121858 | 2.86399449  |
| 6 | -2.74169080 | -2.24648036 | 1.13110295  |
| 6 | -3.57371960 | -0.77484159 | -0.68637263 |
| 6 | -3.36976624 | 0.30478092  | -1.58570011 |
| 6 | -1.88424421 | 2.02026611  | -2.55962417 |
| 6 | 2.90495050  | -2.11576087 | 3.69600609  |
| 6 | 4.39219721  | -0.41231960 | 2.71046138  |
| 6 | 4.82837502  | 1.70026124  | 0.85125942  |
| 6 | 4.00127792  | 3.16312798  | -0.95556446 |
| 6 | -4.00921836 | -2.89441961 | 1.17960045  |
| 6 | -4.83776349 | -1.42895489 | -0.63021662 |
| 6 | -4.41822810 | 0.71902054  | -2.45450048 |
| 6 | -2.93846006 | 2.43601710  | -3.42612267 |
| 6 | 2.67719618  | -3.16202436 | 4.63220664  |
| 6 | 4.16743612  | -1.46264589 | 3.64234449  |
| 6 | 5.04356622  | 2.75813316  | -0.07566811 |
| 6 | -4.23058762 | -3.93782745 | 2.12148142  |
| 6 | -5.04908695 | -2.48951097 | 0.29564102  |
| 6 | -5.67706489 | 0.05873989  | -2.40618026 |
| 6 | -4.20123873 | 1.78516559  | -3.37109636 |
| 6 | -5.88648741 | -1.00901150 | -1.49547860 |
| 6 | -1.93466069 | -3.67370269 | 2.97033817  |
| 6 | 0.37195666  | -3.41913361 | 3.80498287  |
| 6 | -3.19675951 | -4.32820829 | 3.01150014  |
| 6 | -0.89273133 | -4.06663121 | 3.85571521  |
| 6 | 3.73474628  | -3.55712750 | 5.52262840  |
| 6 | 1.41516965  | -3.81141771 | 4.68672091  |
| 6 | -5.51053778 | -4.59250583 | 2.16307746  |
| 6 | -6.32442737 | -3.14409285 | 0.34946754  |
| 6 | -7.15944594 | -1.67606065 | -1.43857859 |
| 6 | -7.34732527 | -2.71660653 | -0.53140112 |

6 -6.51511736 -4.18853732 1.28635699  
6 -5.25937019 2.20108333 -4.24673240  
6 -6.73259042 0.48240144 -3.28653032  
6 -7.99354472 -0.20705788 -3.20885941  
6 -6.50509698 1.53128924 -4.17540973  
6 3.47154594 -4.61975616 6.45671642  
6 -8.19630406 -1.23089229 -2.33186419  
1 -8.79762925 0.11178287 -3.87838946  
6 1.18185280 -4.87008627 5.63145965  
6 -1.11790291 -5.12397881 4.79947249  
6 -3.41452014 -5.38631523 3.96104134  
6 -5.69892459 -5.64804349 3.12305514  
6 4.21549298 4.22272312 -1.88061309  
6 1.91082258 3.97646165 -2.71010440  
6 -0.40308159 3.73514043 -3.53018897  
6 -2.71842081 3.49969137 -4.34254171  
6 -5.01564788 3.26303770 -5.14969382  
6 -3.78387686 3.91285082 -5.21538324  
6 -1.45510010 4.14678275 -4.39437096  
6 0.86165441 4.38428392 -3.57903222  
6 5.49443869 4.87975309 -1.92159068  
6 3.17335075 4.62905773 -2.75388236  
6 -4.70426841 -6.02484901 3.97578270  
6 -0.06360926 -5.49569020 5.66711066  
6 -2.38490272 -5.75615375 4.82425142  
6 2.26003691 -5.24286315 6.50852475  
1 -7.31204837 1.84829089 -4.84368700  
1 -5.82176914 3.58081530 -5.81870028  
6 4.96655441 -2.90779132 5.45520900  
6 5.21788305 -1.86260688 4.53529798  
6 5.65188984 0.24529127 2.66046664  
6 5.86968047 1.29699280 1.73296427

|   |             |             |             |
|---|-------------|-------------|-------------|
| 6 | 6.31587965  | 3.41890440  | -0.12309558 |
| 6 | 6.50418367  | 4.46874817  | -1.05411726 |
| 6 | 7.33614960  | 2.99726621  | 0.76330294  |
| 6 | 7.14248655  | 1.96487536  | 1.67855452  |
| 6 | 6.70046899  | -0.16342291 | 3.55668363  |
| 6 | 6.46445488  | -1.19529476 | 4.46253518  |
| 6 | 7.96341524  | 0.52196450  | 3.47642560  |
| 6 | 8.17310799  | 1.53168424  | 2.58497088  |
| 6 | 5.67635067  | 5.94768083  | -2.86914761 |
| 6 | 3.38391285  | 5.70255508  | -3.68824650 |
| 6 | 1.07873293  | 5.45830934  | -4.50645906 |
| 6 | -1.22933505 | 5.22286627  | -5.32088833 |
| 6 | -3.52668696 | 4.99216601  | -6.13168955 |
| 6 | -2.31430513 | 5.61371877  | -6.18172661 |
| 6 | 2.34613756  | 6.08877216  | -4.53375596 |
| 6 | 0.01687024  | 5.84673391  | -5.35697673 |
| 6 | 4.67486421  | 6.33840978  | -3.70732943 |
| 1 | -2.14315727 | 6.43133307  | -6.88792345 |
| 1 | 0.18229907  | 6.66505344  | -6.06514263 |
| 1 | 2.51198509  | 6.90629030  | -5.24266536 |
| 1 | 4.83800529  | 7.15320039  | -4.41867773 |
| 1 | -4.33523587 | 5.30730639  | -6.79757165 |
| 1 | -4.87224929 | -6.83109908 | 4.69566060  |
| 1 | -2.55645136 | -6.56300178 | 5.54384938  |
| 1 | -0.23385439 | -6.30261438 | 6.38702259  |
| 1 | 2.08534256  | -6.04882573 | 7.22711366  |
| 1 | 8.76292797  | 0.21119917  | 4.15518891  |
| 1 | 7.26595822  | -1.50207461 | 5.14214722  |
| 1 | 5.76769271  | -3.21385304 | 6.13566270  |
| 1 | 4.27586869  | -4.92203512 | 7.13361465  |
| 1 | -6.67063259 | -6.14925532 | 3.15421363  |
| 1 | -7.48765075 | -4.68977049 | 1.32340894  |

|    |             |             |             |
|----|-------------|-------------|-------------|
| 1  | -8.31872321 | -3.21984674 | -0.49185863 |
| 1  | -9.16416564 | -1.73890498 | -2.29227269 |
| 1  | 9.14222249  | 2.03721508  | 2.54306055  |
| 1  | 8.30717960  | 3.50139104  | 0.72577953  |
| 1  | 7.47579122  | 4.97185255  | -1.09036955 |
| 1  | 6.64918684  | 6.44662989  | -2.90291236 |
| 74 | -0.17357118 | -1.82951287 | -1.40225382 |
| 6  | -0.04741234 | -3.73710302 | -1.17891407 |
| 6  | 1.57224148  | -1.85708221 | -2.21916642 |
| 6  | -0.93930556 | -2.14951490 | -3.13896462 |
| 8  | -1.44102659 | -2.32625842 | -4.18373538 |
| 8  | 2.64538953  | -1.83516293 | -2.68988321 |
| 8  | 0.00271723  | -4.89629327 | -1.01071159 |

### TS'(III)-W

|   |             |             |             |
|---|-------------|-------------|-------------|
| 6 | 1.07865053  | -0.23407353 | 0.97253545  |
| 6 | 1.28722773  | 0.83039232  | 0.05159239  |
| 6 | 0.25053039  | 1.21083433  | -0.84829862 |
| 6 | -1.01163613 | 0.54589888  | -0.82087735 |
| 6 | -1.24745580 | -0.48867914 | 0.14461542  |
| 6 | -0.18186346 | -0.90224345 | 1.01626216  |
| 6 | -0.40649307 | -1.97264218 | 1.93461224  |
| 6 | 2.11349853  | -0.63716407 | 1.85256784  |
| 6 | 2.54208548  | 1.48821546  | 0.00969416  |
| 6 | 0.46214591  | 2.26967231  | -1.76930821 |
| 6 | -2.07144554 | 0.96263098  | -1.67727155 |
| 6 | -2.52207777 | -1.14662163 | 0.19057532  |
| 6 | 1.89344290  | -1.70330697 | 2.77330233  |
| 6 | 3.37130856  | 0.02739577  | 1.81163166  |
| 6 | 2.75922841  | 2.54321389  | -0.92108642 |
| 6 | 3.58509328  | 1.08725784  | 0.89268924  |
| 6 | -0.58628614 | 2.67065722  | -2.64709909 |

6 1.72085505 2.93490363 -1.80553481  
6 -1.68893342 -2.59859574 2.01281714  
6 0.64016609 -2.36703872 2.81643005  
6 -2.73361802 -2.20256153 1.13044303  
6 -3.56731374 -0.72601647 -0.68195713  
6 -3.34584735 0.33305765 -1.60269828  
6 -1.85057469 2.02348970 -2.59702217  
6 2.93878039 -2.10150658 3.65805720  
6 4.41527712 -0.37583127 2.69470708  
6 4.84701940 1.74922747 0.84841857  
6 4.02180218 3.20486994 -0.96251747  
6 -4.00775584 -2.83799138 1.19350662  
6 -4.83705286 -1.36705608 -0.61044439  
6 -4.39685656 0.74870723 -2.46872677  
6 -2.90579171 2.44140915 -3.46212564  
6 2.71732462 -3.16047631 4.58195459  
6 4.19617692 -1.43817349 3.61484516  
6 5.06163694 2.80699425 -0.07764228  
6 -4.22301508 -3.88491369 2.13156875  
6 -5.05220030 -2.41916950 0.32436322  
6 -5.66444491 0.10602902 -2.40242124  
6 -4.17366381 1.80151028 -3.39808241  
6 -5.88402427 -0.94719493 -1.47608273  
6 -1.90778936 -3.64795163 2.94439573  
6 0.41284618 -3.41752760 3.75359570  
6 -3.17819081 -4.28967327 3.00109326  
6 -0.85539487 -4.05748726 3.81213245  
6 3.77697703 -3.55867497 5.46949188  
6 1.45848578 -3.81437540 4.63171178  
6 -5.50907091 -4.52624139 2.18844960  
6 -6.33340901 -3.06335062 0.38991995  
6 -7.16346755 -1.59857631 -1.40374206

6 -7.35743109 -2.62943411 -0.48491728  
6 -6.52193622 -4.10789768 1.32786738  
6 -5.23283049 2.21952330 -4.27214043  
6 -6.71971526 0.53072745 -3.28141663  
6 -7.98876901 -0.14105633 -3.18712894  
6 -6.48463963 1.56530295 -4.18619779  
6 3.51879693 -4.63210251 6.39272432  
6 -8.19979395 -1.15131592 -2.29592324  
1 -8.79268635 0.17959102 -3.85597637  
6 1.22777224 -4.87917880 5.57041167  
6 -1.07864655 -5.11717479 4.75243454  
6 -3.39101944 -5.35168532 3.94622056  
6 -5.69231902 -5.58547011 3.14525162  
6 4.23577109 4.26047257 -1.89080961  
6 1.93639570 3.99623428 -2.73334171  
6 -0.36985085 3.73649829 -3.56922728  
6 -2.68324321 3.49943743 -4.38549783  
6 -4.98377243 3.27103120 -5.18635286  
6 -3.74871617 3.91188363 -5.26004240  
6 -1.41966138 4.14333315 -4.43950427  
6 0.89190808 4.39262518 -3.61292674  
6 5.51186073 4.92348744 -1.92807946  
6 3.19613889 4.65562081 -2.77270971  
6 -4.68695484 -5.97737738 3.97846747  
6 -0.01868774 -5.50117933 5.60860552  
6 -2.35130355 -5.73763541 4.79034419  
6 2.30899448 -5.25849981 6.44100272  
1 -7.29193153 1.88344285 -4.85350566  
1 -5.78996850 3.58920894 -5.85507498  
6 5.00380230 -2.90040617 5.41078057  
6 5.24838394 -1.84180815 4.50348146  
6 5.67220141 0.28758784 2.65099549



|   |             |             |             |
|---|-------------|-------------|-------------|
| 6 | 5.88749437  | 1.34659466  | 1.73033739  |
| 6 | 6.33237340  | 3.47246712  | -0.12143809 |
| 6 | 6.51969231  | 4.52064537  | -1.05410864 |
| 6 | 7.35083212  | 3.05447353  | 0.76826914  |
| 6 | 7.15807093  | 2.01896033  | 1.68083760  |
| 6 | 6.72187278  | -0.12366850 | 3.54431108  |
| 6 | 6.49047734  | -1.16606709 | 4.43981343  |
| 6 | 7.98141144  | 0.56864034  | 3.47171098  |
| 6 | 8.18830749  | 1.58536601  | 2.58736358  |
| 6 | 5.69362989  | 5.98747376  | -2.87988263 |
| 6 | 3.40779671  | 5.72418946  | -3.71189829 |
| 6 | 1.11012916  | 5.46240126  | -4.54439492 |
| 6 | -1.19192718 | 5.21585222  | -5.37053017 |
| 6 | -3.48786424 | 4.98359339  | -6.18413125 |
| 6 | -2.27424429 | 5.60208332  | -6.23650480 |
| 6 | 2.37368001  | 6.09956831  | -4.56694335 |
| 6 | 0.05212156  | 5.84226191  | -5.40420122 |
| 6 | 4.69502833  | 6.36754620  | -3.72642032 |
| 1 | -2.10046951 | 6.41508595  | -6.94734359 |
| 1 | 0.21909937  | 6.65746471  | -6.11558136 |
| 1 | 2.53972338  | 6.91397627  | -5.27942140 |
| 1 | 4.85771534  | 7.17924252  | -4.44141870 |
| 1 | -4.29314092 | 5.29864955  | -6.85398802 |
| 1 | -4.85065713 | -6.78663617 | 4.69589881  |
| 1 | -2.52009580 | -6.54724843 | 5.50746732  |
| 1 | -0.18796721 | -6.31181633 | 6.32450221  |
| 1 | 2.13733080  | -6.07114175 | 7.15275401  |
| 1 | 8.78113938  | 0.25686717  | 4.14977588  |
| 1 | 7.29315114  | -1.47532591 | 5.11694596  |
| 1 | 5.80657649  | -3.20861489 | 6.08831229  |
| 1 | 4.32462735  | -4.93875492 | 7.06569169  |
| 1 | -6.66814486 | -6.07753008 | 3.18988746  |

|    |             |             |             |
|----|-------------|-------------|-------------|
| 1  | -7.49826531 | -4.60065441 | 1.37562066  |
| 1  | -8.33387335 | -3.12191847 | -0.43623681 |
| 1  | -9.17388952 | -1.64621945 | -2.24482690 |
| 1  | 9.15534598  | 2.09528957  | 2.55069965  |
| 1  | 8.32034764  | 3.56173510  | 0.73436475  |
| 1  | 7.48910849  | 5.02811537  | -1.08812123 |
| 1  | 6.66379611  | 6.49180975  | -2.91052586 |
| 74 | -0.53653845 | -2.31246665 | -1.11514880 |
| 6  | -0.61216751 | -4.22357517 | -0.89399911 |
| 6  | 1.23217008  | -2.51747576 | -1.84895379 |
| 6  | -1.22429816 | -2.53625748 | -2.89851276 |
| 8  | -1.65915828 | -2.63391805 | -3.98304672 |
| 8  | 2.31749776  | -2.60564555 | -2.28311488 |
| 8  | -0.68088048 | -5.38045683 | -0.71672594 |

**IM(IIIa-b)-W**

|   |             |             |             |
|---|-------------|-------------|-------------|
| 6 | 1.08560834  | -0.28517731 | 0.95949130  |
| 6 | 1.29550311  | 0.78832871  | 0.04529825  |
| 6 | 0.25722670  | 1.18029590  | -0.84946879 |
| 6 | -1.00757783 | 0.52167610  | -0.81862261 |
| 6 | -1.23021294 | -0.54271510 | 0.12357759  |
| 6 | -0.17193268 | -0.95665273 | 1.00616091  |
| 6 | -0.40921796 | -1.99791824 | 1.94898371  |
| 6 | 2.11821270  | -0.67713100 | 1.85114674  |
| 6 | 2.54730198  | 1.44937565  | 0.00759259  |
| 6 | 0.46423774  | 2.24896319  | -1.76055580 |
| 6 | -2.06828631 | 0.93718656  | -1.67403940 |
| 6 | -2.50450512 | -1.20592958 | 0.16987868  |
| 6 | 1.89085819  | -1.72834653 | 2.78493273  |
| 6 | 3.37510347  | -0.01027052 | 1.81154755  |
| 6 | 2.76278799  | 2.51219140  | -0.91647173 |
| 6 | 3.59053035  | 1.04780879  | 0.89095292  |

|   |             |             |             |
|---|-------------|-------------|-------------|
| 6 | -0.58834860 | 2.65771028  | -2.62869983 |
| 6 | 1.72320044  | 2.91216445  | -1.79551541 |
| 6 | -1.68572466 | -2.62939925 | 2.01761663  |
| 6 | 0.63085299  | -2.38326090 | 2.83779224  |
| 6 | -2.72241661 | -2.24359519 | 1.12487011  |
| 6 | -3.55470460 | -0.77112649 | -0.69282380 |
| 6 | -3.34264366 | 0.30184639  | -1.60076390 |
| 6 | -1.85147856 | 2.00833879  | -2.58278796 |
| 6 | 2.93226664  | -2.11949524 | 3.67777532  |
| 6 | 4.41578415  | -0.40693126 | 2.70185544  |
| 6 | 4.85097529  | 1.71247061  | 0.85014141  |
| 6 | 4.02424225  | 3.17506885  | -0.95503339 |
| 6 | -3.99817369 | -2.87409039 | 1.19090086  |
| 6 | -4.82687765 | -1.40797419 | -0.61883799 |
| 6 | -4.39447304 | 0.72478584  | -2.45902191 |
| 6 | -2.90937152 | 2.43094478  | -3.44157303 |
| 6 | 2.70429265  | -3.16554380 | 4.61469510  |
| 6 | 4.19207844  | -1.46068577 | 3.63022210  |
| 6 | 5.06516700  | 2.77337447  | -0.07280007 |
| 6 | -4.22050026 | -3.91129030 | 2.13862562  |
| 6 | -5.04160430 | -2.45926269 | 0.31627229  |
| 6 | -5.66128438 | 0.07888832  | -2.39669310 |
| 6 | -4.17549231 | 1.78756205  | -3.37977120 |
| 6 | -5.87682255 | -0.98101265 | -1.47833751 |
| 6 | -1.91172148 | -3.66750900 | 2.96266356  |
| 6 | 0.40031235  | -3.42432174 | 3.78557354  |
| 6 | -3.18121171 | -4.30867233 | 3.01908374  |
| 6 | -0.86741313 | -4.06485360 | 3.84398915  |
| 6 | 3.76053346  | -3.55751586 | 5.50870055  |
| 6 | 1.44281870  | -3.81449820 | 4.66968774  |
| 6 | -5.50739802 | -4.55050573 | 2.19599296  |
| 6 | -6.32431250 | -3.09952661 | 0.38497391  |

6 -7.15682348 -1.63244680 -1.40584589  
6 -7.34920136 -2.66492100 -0.48976318  
6 -6.51670285 -4.13772174 1.32815103  
6 -5.23684577 2.21100446 -4.24753488  
6 -6.71901159 0.51000138 -3.27000075  
6 -7.98705546 -0.16461577 -3.17845075  
6 -6.48788485 1.55293833 -4.16545142  
6 3.49713253 -4.61903642 6.44404332  
6 -8.19531441 -1.18079689 -2.29365958  
1 -8.79260723 0.15974895 -3.84353190  
6 1.20745602 -4.86882724 5.61908225  
6 -1.09589378 -5.11486314 4.79481169  
6 -3.40112156 -5.35976424 3.97520032  
6 -5.69712406 -5.60042512 3.16157025  
6 4.23629900 4.23772787 -1.87643085  
6 1.93521821 3.98151084 -2.71450767  
6 -0.37482462 3.73118859 -3.54344243  
6 -2.69033021 3.49757231 -4.35537566  
6 -4.99187642 3.27133541 -5.15255323  
6 -3.75803304 3.91574838 -5.22341323  
6 -1.42738379 4.14393335 -4.40702162  
6 0.88710296 4.38625263 -3.58625773  
6 5.51211778 4.90124683 -1.91152778  
6 3.19484157 4.64045650 -2.75262336  
6 -4.69733410 -5.98455148 4.00520824  
6 -0.04010830 -5.48895741 5.66011070  
6 -2.36771350 -5.73615949 4.83157192  
6 2.28533821 -5.24122955 6.49671759  
1 -7.29693391 1.87576832 -4.82831054  
1 -5.80014258 3.59373615 -5.81672525  
6 4.99032508 -2.90497130 5.44444563  
6 5.24078189 -1.85763696 4.52631224

|   |             |             |             |
|---|-------------|-------------|-------------|
| 6 | 5.67303888  | 0.25619845  | 2.65847351  |
| 6 | 5.89019694  | 1.31176625  | 1.73480972  |
| 6 | 6.33476433  | 3.44055115  | -0.11368694 |
| 6 | 6.52118514  | 4.49341778  | -1.04138319 |
| 6 | 7.35331234  | 3.02127496  | 0.77550799  |
| 6 | 7.16033285  | 1.98533521  | 1.68725449  |
| 6 | 6.71999500  | -0.15028399 | 3.55729201  |
| 6 | 6.48472918  | -1.18545335 | 4.45979305  |
| 6 | 7.98031214  | 0.54057164  | 3.48398830  |
| 6 | 8.18921467  | 1.55390959  | 2.59637705  |
| 6 | 5.69193124  | 5.97194165  | -2.85625491 |
| 6 | 3.40364156  | 5.71678945  | -3.68382260 |
| 6 | 1.10238333  | 5.46374367  | -4.50983709 |
| 6 | -1.20326162 | 5.22408762  | -5.32982421 |
| 6 | -3.50131986 | 4.99609978  | -6.13867014 |
| 6 | -2.28866660 | 5.61678506  | -6.18933494 |
| 6 | 2.36664489  | 6.09999344  | -4.53189509 |
| 6 | 0.04110114  | 5.85086542  | -5.36214289 |
| 6 | 4.69135529  | 6.35918214  | -3.69723101 |
| 1 | -2.11793823 | 6.43603414  | -6.89372283 |
| 1 | 0.20556350  | 6.67197367  | -6.06732184 |
| 1 | 2.53077315  | 6.92008417  | -5.23824718 |
| 1 | 4.85275620  | 7.17623222  | -4.40639373 |
| 1 | -4.31091162 | 5.31342260  | -6.80222000 |
| 1 | -4.86640328 | -6.78620416 | 4.72993467  |
| 1 | -2.54118854 | -6.53773878 | 5.55651256  |
| 1 | -0.21248954 | -6.29149517 | 6.38438842  |
| 1 | 2.10959618  | -6.04526222 | 7.21718791  |
| 1 | 8.77843279  | 0.23117212  | 4.16502264  |
| 1 | 7.28479498  | -1.49043060 | 5.14192438  |
| 1 | 5.79048224  | -3.20849626 | 6.12720834  |
| 1 | 4.30102184  | -4.91993197 | 7.12205773  |

|    |             |             |             |
|----|-------------|-------------|-------------|
| 1  | -6.67369695 | -6.09114673 | 3.20508975  |
| 1  | -7.49425037 | -4.62802951 | 1.37724906  |
| 1  | -8.32609637 | -3.15638200 | -0.43922813 |
| 1  | -9.16888453 | -1.67682838 | -2.24355114 |
| 1  | 9.15632390  | 2.06368507  | 2.55983680  |
| 1  | 8.32228493  | 3.52970429  | 0.74336905  |
| 1  | 7.49030610  | 5.00158552  | -1.07317992 |
| 1  | 6.66229720  | 6.47595888  | -2.88563836 |
| 74 | -0.49122656 | -2.04086123 | -1.42847674 |
| 6  | -0.39151676 | -3.94805442 | -1.17571661 |
| 6  | 1.24308878  | -2.10011495 | -2.26858690 |
| 6  | -1.29409169 | -2.34997515 | -3.15230058 |
| 8  | -1.81341964 | -2.50869681 | -4.19114807 |
| 8  | 2.30904848  | -2.10071676 | -2.75588793 |
| 8  | -0.34808230 | -5.10327818 | -0.98154979 |

**IIId-W**

|   |              |              |              |
|---|--------------|--------------|--------------|
| 6 | 0.720869460  | -0.512147880 | 1.031002300  |
| 6 | 0.919517850  | 0.547510320  | 0.099252210  |
| 6 | -0.143509360 | 0.946441030  | -0.760655770 |
| 6 | -1.400672590 | 0.281950390  | -0.694237140 |
| 6 | -1.595347340 | -0.782785280 | 0.229944980  |
| 6 | -0.535139440 | -1.178158210 | 1.093767580  |
| 6 | -0.733123370 | -2.236617150 | 2.021949930  |
| 6 | 1.774907340  | -0.900622110 | 1.901201630  |
| 6 | 2.174807010  | 1.208693830  | 0.031723000  |
| 6 | 0.047217330  | 2.014331570  | -1.679178890 |
| 6 | -2.463507340 | 0.683897760  | -1.548025910 |
| 6 | -2.849832450 | -1.447690210 | 0.294099120  |
| 6 | 1.573981100  | -1.956868910 | 2.834320510  |
| 6 | 3.030367590  | -0.229579840 | 1.843005150  |
| 6 | 2.364578370  | 2.263497710  | -0.903789470 |

|   |              |              |              |
|---|--------------|--------------|--------------|
| 6 | 3.234124400  | 0.818682770  | 0.908150570  |
| 6 | -1.021122430 | 2.422026040  | -2.528621630 |
| 6 | 1.304915830  | 2.676843810  | -1.746833830 |
| 6 | -1.989119410 | -2.904529970 | 2.082814880  |
| 6 | 0.323406300  | -2.625810430 | 2.892179060  |
| 6 | -3.045090140 | -2.511499980 | 1.220147510  |
| 6 | -3.911747050 | -1.048229740 | -0.565564430 |
| 6 | -3.719411700 | 0.017058590  | -1.483408840 |
| 6 | -2.272403630 | 1.756605240  | -2.464823710 |
| 6 | 2.629550400  | -2.342261220 | 3.714161160  |
| 6 | 4.082589620  | -0.611406800 | 2.729429990  |
| 6 | 4.493660140  | 1.481994290  | 0.857959200  |
| 6 | 3.630245120  | 2.931850550  | -0.971545460 |
| 6 | -4.304001000 | -3.180066060 | 1.282389570  |
| 6 | -5.170590750 | -1.717129930 | -0.501572320 |
| 6 | -4.786343640 | 0.421305830  | -2.340495250 |
| 6 | -3.342281390 | 2.163000050  | -3.317915990 |
| 6 | 2.427056880  | -3.398942990 | 4.643999280  |
| 6 | 3.878960980  | -1.666668890 | 3.661730740  |
| 6 | 4.702712940  | 2.537495360  | -0.090085550 |
| 6 | -4.496880740 | -4.242071990 | 2.208384760  |
| 6 | -5.362625820 | -2.782113810 | 0.420602380  |
| 6 | -6.039280370 | -0.247951890 | -2.276055520 |
| 6 | -4.594795390 | 1.493167370  | -3.254753420 |
| 6 | -6.230707100 | -1.314979970 | -1.359787460 |
| 6 | -2.186550160 | -3.967735440 | 3.013583090  |
| 6 | 0.123296340  | -3.687204810 | 3.825321880  |
| 6 | -3.441347260 | -4.634491180 | 3.071737360  |
| 6 | -1.129808820 | -4.356296280 | 3.881714210  |
| 6 | 3.494730400  | -3.780433890 | 5.529336410  |
| 6 | 1.178182450  | -4.071161210 | 4.697835120  |
| 6 | -5.768324840 | -4.912797770 | 2.264572280  |

|   |              |              |              |
|---|--------------|--------------|--------------|
| 6 | -6.628956770 | -3.455386020 | 0.483561790  |
| 6 | -7.496448530 | -1.994658060 | -1.291113580 |
| 6 | -7.666238240 | -3.037786040 | -0.383230130 |
| 6 | -6.793656230 | -4.510968430 | 1.411630750  |
| 6 | -5.669422780 | 1.900882180  | -4.114833890 |
| 6 | -7.110150590 | 0.164396150  | -3.143582310 |
| 6 | -8.363803160 | -0.536120720 | -3.053043200 |
| 6 | -6.904978510 | 1.216714620  | -4.033134120 |
| 6 | 3.256661790  | -4.856239190 | 6.455103780  |
| 6 | -8.547081810 | -1.561311810 | -2.173798020 |
| 1 | -9.177826990 | -0.223853710 | -3.713642890 |
| 6 | 0.969983320  | -5.141981850 | 5.635218690  |
| 6 | -1.329694810 | -5.425192830 | 4.819051200  |
| 6 | -3.632930250 | -5.706508690 | 4.011922590  |
| 6 | -5.928399370 | -5.983076650 | 3.213162950  |
| 6 | 3.821977070  | 4.012287150  | -1.898024680 |
| 6 | 1.491604510  | 3.761904260  | -2.663692880 |
| 6 | -0.833887430 | 3.502396300  | -3.442673350 |
| 6 | -3.152368390 | 3.238390400  | -4.228244970 |
| 6 | -5.453776090 | 2.973379990  | -5.012309420 |
| 6 | -4.234706420 | 3.642769190  | -5.085197550 |
| 6 | -1.902486800 | 3.907743280  | -4.288660700 |
| 6 | 0.418537890  | 4.172086140  | -3.504416170 |
| 6 | 5.097599770  | 4.696138970  | -1.961839680 |
| 6 | 2.737440850  | 4.428872240  | -2.737951810 |
| 6 | -4.914765660 | -6.359804000 | 4.042728850  |
| 6 | -0.263199460 | -5.788968970 | 5.674320610  |
| 6 | -2.586475160 | -6.074488730 | 4.854378120  |
| 6 | 2.058212570  | -5.503083900 | 6.504743240  |
| 1 | -7.723521530 | 1.527234920  | -4.690442960 |
| 1 | -6.273519280 | 3.284666990  | -5.667771210 |
| 6 | 4.711207650  | -3.105254760 | 5.466718680  |



|   |              |              |              |
|---|--------------|--------------|--------------|
| 6 | 4.937194670  | -2.049033730 | 4.552797140  |
| 6 | 5.329925740  | 0.066702960  | 2.682962130  |
| 6 | 5.533168840  | 1.118369920  | 1.749122090  |
| 6 | 5.965883960  | 3.236588090  | -0.115520050 |
| 6 | 6.164421710  | 4.238438060  | -1.135604670 |
| 6 | 6.987405700  | 2.833583440  | 0.779346750  |
| 6 | 6.795561220  | 1.811692200  | 1.703505760  |
| 6 | 6.383321000  | -0.317413900 | 3.582749130  |
| 6 | 6.168091370  | -1.355242030 | 4.486260010  |
| 6 | 7.632025500  | 0.393683050  | 3.510044490  |
| 6 | 7.827607570  | 1.405381420  | 2.618289940  |
| 6 | 5.241258340  | 5.779322690  | -2.904064300 |
| 6 | 2.916729690  | 5.525845650  | -3.642239670 |
| 6 | 0.602816370  | 5.263420110  | -4.417875560 |
| 6 | -1.708169440 | 4.999597060  | -5.205449510 |
| 6 | -4.008746610 | 4.736387210  | -5.993033470 |
| 6 | -2.809766600 | 5.381083430  | -6.049694630 |
| 6 | 1.856145410  | 5.916639760  | -4.456695040 |
| 6 | -0.476854920 | 5.647175860  | -5.249058190 |
| 6 | 4.202075080  | 6.179044830  | -3.685880850 |
| 1 | -2.661135760 | 6.210013410  | -6.747680770 |
| 1 | -0.333965340 | 6.477742480  | -5.947532320 |
| 1 | 1.996323100  | 6.749610490  | -5.152618370 |
| 1 | 4.330105940  | 7.007535820  | -4.387556960 |
| 1 | -4.831474680 | 5.043302700  | -6.645322260 |
| 1 | -5.060492920 | -7.175956540 | 4.756309550  |
| 1 | -2.737848290 | -6.890329990 | 5.568510770  |
| 1 | -0.415720180 | -6.603875200 | 6.389288550  |
| 1 | 1.900537460  | -6.318329100 | 7.216828280  |
| 1 | 8.433226340  | 0.099946630  | 4.194228540  |
| 1 | 6.974362400  | -1.645701440 | 5.167320370  |
| 1 | 5.520003050  | -3.397838760 | 6.143903270  |

|    |              |              |              |
|----|--------------|--------------|--------------|
| 1  | 4.069204570  | -5.147578400 | 7.126936440  |
| 1  | -6.894490410 | -6.494390920 | 3.255339640  |
| 1  | -7.759253010 | -5.024671360 | 1.458938720  |
| 1  | -8.631725770 | -3.551605710 | -0.335266810 |
| 1  | -9.509478070 | -2.078758850 | -2.122888140 |
| 1  | 8.786560950  | 1.929829640  | 2.579649770  |
| 1  | 7.951633410  | 3.349522470  | 0.737842000  |
| 1  | 7.133593700  | 4.740802760  | -1.195159910 |
| 1  | 6.212396540  | 6.277605080  | -2.968109270 |
| 74 | 5.588612320  | 2.373409500  | -2.395428290 |
| 6  | 5.442424640  | 0.406980480  | -2.425176840 |
| 6  | 7.444133200  | 2.152723140  | -2.955649110 |
| 6  | 5.156377060  | 2.383425050  | -4.301512050 |
| 8  | 4.884706100  | 2.432464930  | -5.435322120 |
| 8  | 8.565629440  | 2.053986290  | -3.268729130 |
| 8  | 5.354614140  | -0.754407710 | -2.405008080 |

**TS(IIId-e)-W**

|   |             |             |             |
|---|-------------|-------------|-------------|
| 6 | 0.65218291  | -0.54756671 | 1.09308200  |
| 6 | 0.86373989  | 0.50402765  | 0.15768897  |
| 6 | -0.19002387 | 0.90446273  | -0.71264052 |
| 6 | -1.45268299 | 0.25231750  | -0.64721499 |
| 6 | -1.66324230 | -0.80079554 | 0.28721766  |
| 6 | -0.61098764 | -1.20027139 | 1.15750664  |
| 6 | -0.82182792 | -2.25106512 | 2.09178889  |
| 6 | 1.70262606  | -0.94614636 | 1.96438983  |
| 6 | 2.12553658  | 1.15474206  | 0.09393116  |
| 6 | 0.01877228  | 1.95757552  | -1.64578241 |
| 6 | -2.50634421 | 0.65264280  | -1.51468601 |
| 6 | -2.92484213 | -1.45282667 | 0.35189686  |
| 6 | 1.49009156  | -1.99825715 | 2.90047510  |
| 6 | 2.96503693  | -0.29341385 | 1.90044833  |

|   |             |             |             |
|---|-------------|-------------|-------------|
| 6 | 2.33632735  | 2.20868534  | -0.84280621 |
| 6 | 3.17664942  | 0.75564749  | 0.96594144  |
| 6 | -1.03771889 | 2.35952257  | -2.51189629 |
| 6 | 1.28238132  | 2.61044379  | -1.71164894 |
| 6 | -2.08482149 | -2.90379483 | 2.15533134  |
| 6 | 0.23068957  | -2.64962031 | 2.96365060  |
| 6 | -3.13464575 | -2.50545933 | 1.28662358  |
| 6 | -3.97825401 | -1.05224366 | -0.51796207 |
| 6 | -3.76952035 | -0.00105967 | -1.44893276 |
| 6 | -2.29791199 | 1.70754843  | -2.44664861 |
| 6 | 2.54377445  | -2.39768661 | 3.77500388  |
| 6 | 4.01805380  | -0.69436049 | 2.77685333  |
| 6 | 4.44430568  | 1.40830429  | 0.90240427  |
| 6 | 3.59961714  | 2.85826863  | -0.90554722 |
| 6 | -4.40089640 | -3.16002176 | 1.35063097  |
| 6 | -5.24388033 | -1.70729657 | -0.45274870 |
| 6 | -4.82624712 | 0.40131895  | -2.31888541 |
| 6 | -3.35679438 | 2.11056424  | -3.31443036 |
| 6 | 2.32969866  | -3.44924405 | 4.70890653  |
| 6 | 3.80463613  | -1.74435620 | 3.71098290  |
| 6 | 4.65858348  | 2.45644675  | -0.03399086 |
| 6 | -4.60810323 | -4.21171695 | 2.28547290  |
| 6 | -5.45162088 | -2.75951174 | 0.48075481  |
| 6 | -6.08724335 | -0.25380822 | -2.25227960 |
| 6 | -4.61698344 | 1.45603228  | -3.24882766 |
| 6 | -6.29522961 | -1.30503922 | -1.32241518 |
| 6 | -2.29566018 | -3.95866072 | 3.09283299  |
| 6 | 0.01840531  | -3.70407272 | 3.90097239  |
| 6 | -3.55852627 | -4.60982227 | 3.15414065  |
| 6 | -1.24372834 | -4.35580575 | 3.96277797  |
| 6 | 3.39747219  | -3.84698329 | 5.58777448  |
| 6 | 1.07115139  | -4.10046795 | 4.77149096  |

|   |             |             |             |
|---|-------------|-------------|-------------|
| 6 | -5.88669997 | -4.86745640 | 2.34418719  |
| 6 | -6.72537470 | -3.41863932 | 0.54547526  |
| 6 | -7.56879460 | -1.97046885 | -1.25165676 |
| 6 | -7.75429814 | -2.99991624 | -0.33143269 |
| 6 | -6.90532639 | -4.46215329 | 1.48356625  |
| 6 | -5.68164305 | 1.86127487  | -4.12308610 |
| 6 | -7.14822925 | 0.15696032  | -3.13269554 |
| 6 | -8.41006893 | -0.52789210 | -3.03901338 |
| 6 | -6.92561539 | 1.19253083  | -4.03775119 |
| 6 | 3.14640444  | -4.91463905 | 6.51942177  |
| 6 | -8.60975737 | -1.53813032 | -2.14592148 |
| 1 | -9.21683853 | -0.21641607 | -3.70880590 |
| 6 | 0.85020560  | -5.16493194 | 5.71397706  |
| 6 | -1.45651956 | -5.41725146 | 4.90580698  |
| 6 | -3.76393842 | -5.67255514 | 4.10114108  |
| 6 | -6.06149520 | -5.92722392 | 3.30135903  |
| 6 | 3.80149958  | 3.91485354  | -1.84787230 |
| 6 | 1.48642224  | 3.66789024  | -2.64666834 |
| 6 | -0.83206025 | 3.42021068  | -3.44353902 |
| 6 | -3.14822566 | 3.16798239  | -4.24248694 |
| 6 | -5.44795115 | 2.91496947  | -5.03738611 |
| 6 | -4.22002178 | 3.56921043  | -5.11408953 |
| 6 | -1.89124501 | 3.82181200  | -4.30592748 |
| 6 | 0.42752149  | 4.07383667  | -3.50684883 |
| 6 | 5.07456637  | 4.61249708  | -1.87633425 |
| 6 | 2.74864381  | 4.32214783  | -2.71294774 |
| 6 | -5.05344677 | -6.30953949 | 4.13573884  |
| 6 | -0.39236121 | -5.79251629 | 5.76044091  |
| 6 | -2.72146276 | -6.04897406 | 4.94630099  |
| 6 | 1.93706862  | -5.54028865 | 6.57921001  |
| 1 | -7.73634538 | 1.50162594  | -4.70529623 |
| 1 | -6.25956676 | 3.22409259  | -5.70384146 |

|   |             |             |             |
|---|-------------|-------------|-------------|
| 6 | 4.62618598  | -3.19610413 | 5.51188520  |
| 6 | 4.86514337  | -2.14682660 | 4.59180185  |
| 6 | 5.27907243  | -0.04155165 | 2.71265150  |
| 6 | 5.49196354  | 1.00616817  | 1.77856353  |
| 6 | 5.93932083  | 3.10222382  | -0.09484537 |
| 6 | 6.15360287  | 4.15647942  | -1.05498583 |
| 6 | 6.95741308  | 2.69153816  | 0.78273439  |
| 6 | 6.76422213  | 1.66522462  | 1.71144353  |
| 6 | 6.33595800  | -0.44906987 | 3.59731936  |
| 6 | 6.10896676  | -1.48138519 | 4.50775863  |
| 6 | 7.59823654  | 0.23078962  | 3.50454427  |
| 6 | 7.80252579  | 1.23756320  | 2.60669660  |
| 6 | 5.25111814  | 5.65975074  | -2.85833500 |
| 6 | 2.94032840  | 5.40683535  | -3.64425964 |
| 6 | 0.63026244  | 5.14816753  | -4.43869442 |
| 6 | -1.67786968 | 4.89367542  | -5.24008113 |
| 6 | -3.97531596 | 4.64275413  | -6.03938980 |
| 6 | -2.76769412 | 5.27251494  | -6.09899168 |
| 6 | 1.88898545  | 5.78889568  | -4.47719682 |
| 6 | -0.43759033 | 5.52733811  | -5.28485680 |
| 6 | 4.21971890  | 6.04437977  | -3.68523488 |
| 1 | -2.60456679 | 6.08691089  | -6.81071524 |
| 1 | -0.28070051 | 6.34422950  | -5.99635152 |
| 1 | 2.04376656  | 6.60807193  | -5.18618968 |
| 1 | 4.37950268  | 6.85116376  | -4.40562453 |
| 1 | -4.78960287 | 4.94762019  | -6.70309952 |
| 1 | -5.21015871 | -7.11821042 | 4.85546893  |
| 1 | -2.88333539 | -6.85857917 | 5.66518895  |
| 1 | -0.55475277 | -6.60205001 | 6.47928887  |
| 1 | 1.76982365  | -6.34977718 | 7.29565127  |
| 1 | 8.40375510  | -0.08092142 | 4.17564320  |
| 1 | 6.91804628  | -1.78825785 | 5.17825136  |

|    |             |             |             |
|----|-------------|-------------|-------------|
| 1  | 5.43535893  | -3.50272833 | 6.18237269  |
| 1  | 3.95792671  | -5.21767071 | 7.18730117  |
| 1  | -7.03366208 | -6.42663676 | 3.34614631  |
| 1  | -7.87659491 | -4.96486138 | 1.53254926  |
| 1  | -8.72542500 | -3.50284609 | -0.28207417 |
| 1  | -9.57810708 | -2.04412158 | -2.09307660 |
| 1  | 8.77278659  | 1.73888920  | 2.55002344  |
| 1  | 7.93366265  | 3.18294540  | 0.72661490  |
| 1  | 7.05518529  | 4.77008634  | -0.96645275 |
| 1  | 6.20603362  | 6.19314949  | -2.88484028 |
| 74 | 6.15976863  | 3.08438964  | -3.19818774 |
| 6  | 5.88794431  | 1.27686437  | -3.86702900 |
| 6  | 7.97964695  | 2.58099904  | -2.84739921 |
| 6  | 6.77610090  | 3.61976989  | -4.94149180 |
| 8  | 7.16188759  | 4.01258268  | -5.97653232 |
| 8  | 9.08776568  | 2.29298779  | -2.60089186 |
| 8  | 5.68634845  | 0.17656137  | -4.20772335 |

#### **Ille-W**

|   |             |             |             |
|---|-------------|-------------|-------------|
| 6 | 0.73959363  | -0.58499709 | 1.15723367  |
| 6 | 0.96048181  | 0.46712918  | 0.22335441  |
| 6 | -0.08362354 | 0.86940433  | -0.65376333 |
| 6 | -1.34976113 | 0.22005168  | -0.59811854 |
| 6 | -1.56857959 | -0.83483582 | 0.33129674  |
| 6 | -0.52382176 | -1.23736608 | 1.20905822  |
| 6 | -0.74366885 | -2.28977446 | 2.13970293  |
| 6 | 1.78009828  | -0.98285505 | 2.04000962  |
| 6 | 2.22452870  | 1.11869445  | 0.17133242  |
| 6 | 0.13499073  | 1.92385475  | -1.58406620 |
| 6 | -2.39675028 | 0.62653628  | -1.46920863 |
| 6 | -2.83198802 | -1.48518357 | 0.38513073  |
| 6 | 1.55871621  | -2.03478924 | 2.97253760  |

|   |             |             |             |
|---|-------------|-------------|-------------|
| 6 | 3.04258401  | -0.32570328 | 1.99296752  |
| 6 | 2.44660122  | 2.16650321  | -0.76511501 |
| 6 | 3.26434263  | 0.72238674  | 1.06097048  |
| 6 | -0.91754869 | 2.33383277  | -2.45229892 |
| 6 | 1.40158435  | 2.56920292  | -1.64299247 |
| 6 | -2.00797837 | -2.94263735 | 2.19057059  |
| 6 | 0.29931248  | -2.68868825 | 3.02091044  |
| 6 | -3.05005775 | -2.54112660 | 1.31498011  |
| 6 | -3.87815494 | -1.07913603 | -0.48900758 |
| 6 | -3.66150851 | -0.02342757 | -1.41341386 |
| 6 | -2.18022810 | 1.68674471  | -2.39491679 |
| 6 | 2.60259139  | -2.43177744 | 3.86045216  |
| 6 | 4.08324707  | -0.72047746 | 2.88453533  |
| 6 | 4.52735185  | 1.38246241  | 1.02011008  |
| 6 | 3.71922551  | 2.81344249  | -0.81064610 |
| 6 | -4.31728205 | -3.19420895 | 1.36725669  |
| 6 | -5.14601769 | -1.73209013 | -0.43471724 |
| 6 | -4.71303972 | 0.38692677  | -2.28607972 |
| 6 | -3.23388548 | 2.09896297  | -3.26299779 |
| 6 | 2.37999186  | -3.48490324 | 4.79031569  |
| 6 | 3.86109086  | -1.77301246 | 3.81488714  |
| 6 | 4.74862725  | 2.43175841  | 0.08489065  |
| 6 | -4.53254858 | -4.24928032 | 2.29665725  |
| 6 | -5.36139235 | -2.78838601 | 0.49192622  |
| 6 | -5.97575611 | -0.26553310 | -2.23025589 |
| 6 | -4.49685119 | 1.44736742  | -3.20727329 |
| 6 | -6.19112175 | -1.32292982 | -1.30780784 |
| 6 | -2.22719765 | -3.99945797 | 3.12339651  |
| 6 | 0.07834479  | -3.74492577 | 3.95486890  |
| 6 | -3.49093042 | -4.65058678 | 3.17187438  |
| 6 | -1.18338341 | -4.39803903 | 4.00239941  |
| 6 | 3.43630272  | -3.87962942 | 5.68202640  |

|   |             |             |             |
|---|-------------|-------------|-------------|
| 6 | 1.12158085  | -4.14036584 | 4.83647293  |
| 6 | -5.81300091 | -4.90420912 | 2.34288627  |
| 6 | -6.63677842 | -3.44585466 | 0.54503941  |
| 6 | -7.46585799 | -1.98580156 | -1.24865798 |
| 6 | -7.65868046 | -3.02107251 | -0.33516221 |
| 6 | -6.82420011 | -4.49439172 | 1.47749808  |
| 6 | -5.55620895 | 1.86156554  | -4.08272571 |
| 6 | -7.03075177 | 0.15319081  | -3.11252648 |
| 6 | -8.29415850 | -0.52960950 | -3.03080568 |
| 6 | -6.80098147 | 1.19593001  | -4.00917681 |
| 6 | 3.17766288  | -4.94946160 | 6.60812008  |
| 6 | -8.50072603 | -1.54585817 | -2.14570906 |
| 1 | -9.09664576 | -0.21203668 | -3.70285922 |
| 6 | 0.89257439  | -5.20607621 | 5.77437989  |
| 6 | -1.40462305 | -5.46161874 | 4.94131054  |
| 6 | -3.70445298 | -5.71655611 | 4.11459839  |
| 6 | -5.99563322 | -5.96799837 | 3.29490134  |
| 6 | 3.94323621  | 3.86711711  | -1.75201898 |
| 6 | 1.61169342  | 3.62561801  | -2.58107361 |
| 6 | -0.70545065 | 3.39892613  | -3.37595525 |
| 6 | -3.01843545 | 3.16280018  | -4.18235764 |
| 6 | -5.31505437 | 2.92322599  | -4.98854536 |
| 6 | -4.08675105 | 3.57377503  | -5.05493148 |
| 6 | -1.75942734 | 3.81145762  | -4.23696545 |
| 6 | 0.56067022  | 4.04566995  | -3.43326082 |
| 6 | 5.22760072  | 4.53770834  | -1.77899724 |
| 6 | 2.88507492  | 4.27491910  | -2.64090796 |
| 6 | -4.99484263 | -6.35356336 | 4.13582563  |
| 6 | -0.35028881 | -5.83674948 | 5.80567238  |
| 6 | -2.67058843 | -6.09460892 | 4.96757454  |
| 6 | 1.96950370  | -5.57975581 | 6.65175412  |
| 1 | -7.60787773 | 1.51150077  | -4.67833973 |



|   |             |             |             |
|---|-------------|-------------|-------------|
| 1 | -6.12317013 | 3.23916939  | -5.65607897 |
| 6 | 4.66413253  | -3.22151002 | 5.62382855  |
| 6 | 4.90970034  | -2.17099280 | 4.71057167  |
| 6 | 5.34157182  | -0.05855074 | 2.84122554  |
| 6 | 5.56180027  | 0.99027525  | 1.91370074  |
| 6 | 6.02330549  | 3.10066845  | 0.04943835  |
| 6 | 6.23009258  | 4.13048931  | -0.88380054 |
| 6 | 7.03525427  | 2.69005267  | 0.95345882  |
| 6 | 6.83465432  | 1.66392707  | 1.86885545  |
| 6 | 6.38694425  | -0.46197825 | 3.74456308  |
| 6 | 6.15282699  | -1.49548407 | 4.64645120  |
| 6 | 7.64759814  | 0.22940431  | 3.67503846  |
| 6 | 7.86009095  | 1.23867594  | 2.78527604  |
| 6 | 5.44459635  | 5.54416709  | -2.79826207 |
| 6 | 3.08718121  | 5.36269604  | -3.57681539 |
| 6 | 0.77057187  | 5.12497333  | -4.36306767 |
| 6 | -1.53887794 | 4.89067714  | -5.16574000 |
| 6 | -3.83549731 | 4.65419052  | -5.97235319 |
| 6 | -2.62655258 | 5.27962618  | -6.02472534 |
| 6 | 2.02794915  | 5.75002506  | -4.41357700 |
| 6 | -0.29875327 | 5.51635317  | -5.20760194 |
| 6 | 4.41212540  | 5.94204344  | -3.66553695 |
| 1 | -2.45805797 | 6.09775071  | -6.73081901 |
| 1 | -0.13499889 | 6.33399689  | -5.91647821 |
| 1 | 2.19251667  | 6.56296977  | -5.12730360 |
| 1 | 4.59089183  | 6.73218916  | -4.39827229 |
| 1 | -4.64707217 | 4.96597712  | -6.63616190 |
| 1 | -5.15763292 | -7.16471707 | 4.85140919  |
| 1 | -2.83865709 | -6.90600247 | 5.68303635  |
| 1 | -0.51881719 | -6.64770986 | 6.52152089  |
| 1 | 1.79625548  | -6.39097862 | 7.36478414  |
| 1 | 8.44241566  | -0.07775679 | 4.36091309  |

|    |             |             |             |
|----|-------------|-------------|-------------|
| 1  | 6.95245906  | -1.79899778 | 5.32978223  |
| 1  | 5.46498933  | -3.52537385 | 6.30554751  |
| 1  | 3.98162061  | -5.25080772 | 7.28586320  |
| 1  | -6.96835280 | -6.46711828 | 3.32993498  |
| 1  | -7.79648189 | -4.99597347 | 1.51719488  |
| 1  | -8.63109480 | -3.52235354 | -0.29483576 |
| 1  | -9.47031727 | -2.05032112 | -2.10189261 |
| 1  | 8.82673603  | 1.74917886  | 2.74962534  |
| 1  | 8.00461197  | 3.19717134  | 0.92122879  |
| 1  | 7.20184602  | 4.63226360  | -0.91961202 |
| 1  | 6.42290288  | 6.02620189  | -2.85938970 |
| 74 | 4.86066753  | 3.68270483  | -4.09740310 |
| 6  | 4.39403354  | 1.78367900  | -4.41659939 |
| 6  | 6.72795985  | 3.22074023  | -4.38452774 |
| 6  | 4.78309974  | 3.97285923  | -6.01889714 |
| 8  | 4.72205178  | 4.18457754  | -7.16719549 |
| 8  | 7.86083500  | 2.97060081  | -4.52992725 |
| 8  | 4.10333270  | 0.66903169  | -4.58440424 |
