# Supplementary material for: Organometallic chemistry of new carbon materials. Structure and dynamic behavior of group 6 metal tricabonyl complexes of graphene and perforated graphene: a DFT study
Source: Royal Society of Chemistry journal article supplement (doi:10.1039/c9nj02187f), 2019-01-01
Supplement: c9nj02187f2.pdf [file c9nj02187f2.pdf]

## SUPPLEMENTARY INFORMATION

### Organometallic Chemistry of New Carbon Material IV. Structure and Dynamic Behavior of Group 6 metal Tricarbonyl Complexes of Graphene and Perforated Graphene: A DFT Study

*N. S. Zhulyaev, I. P. Gloriov, M. S. Nechaev, F. Gam, Yu. F. Oprunenko, J.-Y. Saillard*

Table S1. Selected bond lengths (Å) and angles (°) for the optimized structure of coronene **I**, comparison with previous DFT, X ray and electron diffraction data.

Table S2. Selected bond lengths (Å) and angles (°) for the optimized structure of kekulene **II** and comparison with X ray and previous DFT calculations.

Table S3. Calculated and experimental chemical shifts <sup>1</sup>H and <sup>13</sup>C (ppm) for **I**, **II**, **Ia,b-M** and **IIa,b-M** (M=Cr,Mo). Atoms numbering as in Fig.3. Data for W were not calculated.

Table S4. Symmetrical (*A*) and unsymmetrical (*E*)  $\nu_{\text{CO}}$  vibrational frequencies (in cm<sup>-1</sup>) complexes **Ia,b-M** **IIa,b-M**. Vibrational frequencies of ( $\eta^6$ -naphthalene)M(CO)<sub>3</sub> **V** (M=Cr, Mo, W) are presented for comparison.

Table S5. NICS (1) data calculated for **I** and **II**. In brackets: NICS (0) extracted from literature.

Table S6. Selected computed data for the optimized structures of **Ia,b-M**. Relative energies in kcal/mol, bond lengths in Å.

Table S7. Selected computed data for the optimized structures **IIa,b-M**. Relative energies in kcal/mol; bond lengths in Å, for all **IIa-M**  $\Delta G=0$  kcal/mol; for **IIb-M**  $\Delta G=1.6$  kcal/mol (Mo)  $\Delta G=3.1$  kcal/mol (W).

Table S8. Selected bond lengths in **TS(Ia-b)**, **IM(Ia-b)**, **TS' (Ia-b)** for Mo and W complexes, Å.

Table S9. Selected bond lengths in **TS(Ia-a)** for Cr, Mo, W complexes, Å.

Table S10. Selected bond lengths in **TS(IIa-b)** for Cr, Mo, W complexes, Å. Table.

S11. Experimental for related complexes and calculated IR  $\nu_{\text{CO}}$  values for metal tricarbonyl complexes of graphene (cm<sup>-1</sup>). Table S12. Computed bond lengths (Å) in model graphene **III**.

Table S1. Selected bond lengths (Å) and angles (°) for the optimized structure of coronene **I**, comparison with previous DFT, X ray and electron diffraction data.

| Bond lengths | PBE/L2 | X ray  | $\Delta$ | B3LYP/6-31G | $\Delta$ (DFT) | Electron diffraction |
|--------------|--------|--------|----------|-------------|----------------|----------------------|
| C1-C4        | 1.423  | 1.405  | 0.018    | 1.426       | -0.003         | 1.444                |
| C1-C2        | 1.425  | 1.413  | 0.012    | 1.424       | 0.001          | 1.381                |
| C2-C3        | 1.426  | 1.412  | 0.014    | 1.423       | 0.003          | 1.438                |
| C4-C5        | 1.375  | 1.360  | 0.015    | 1.375       | 0.000          | 1.362                |
| C-H          | 1.092  | 0.983  | 0.109    | 1.093       | -0.001         | 1.090                |
| C4-C1-C2     | 118.76 | 118.74 | 0.02     | 118.77      | -0.01          |                      |
| C1-C2-C3     | 120.00 | 118.84 | 1.16     | 120.00      | 0.00           |                      |
| C5-C4-C1     | 121.26 | 122.02 | -0.76    | 121.22      | 0.040          |                      |

$\Delta$ : Difference between X ray and our DFT results, J. M. Robertson and J. G. White, *J. Chem. Soc. (Resumed)*, 1945, 607.

$\Delta$ (DFT): Difference between our DFT results and DFT from the literature (G.R. Jenness and K.D. Jordan, *J. Phys. Chem. C*, 2009, **113**, 10242).

Table S2. Selected bond lengths (Å) and angles (°) for the optimized structure of kekulene **II** and comparison with X ray and previous DFT calculations.

| Bond lengths       | PBE/L2 | X ray | $\Delta$ | B3LYP/6-31G | $\Delta$ (DFT) |
|--------------------|--------|-------|----------|-------------|----------------|
| C1-C2              | 1.439  | 1.445 | -0.006   | 1.441       | -0.002         |
| C1-C6              | 1.366  | 1.350 | 0.016    | 1.362       | 0.004          |
| C3-C4              | 1.457  | 1.456 | 0.001    | 1.460       | -0.003         |
| C4-C5              | 1.395  | 1.394 | 0.001    | 1.394       | 0.001          |
| C-H <sub>in</sub>  | 1.085  | -     | -        | -           | -              |
| C-H <sub>out</sub> | 1.093  | -     | -        | -           | -              |
| C6-C1-C2           | 121.8  | 122.0 | -0.2     | -           | -              |
| C2-C3-C4           | 119.9  | 119.9 | 0.0      | -           | -              |
| C4-C5-C7           | 123.5  | 123.7 | -0.2     | -           | -              |
| C5-C7-C8           | 118.4  | 118.3 | 0.1      | -           | -              |

$\Delta$ : Difference between X ray and our DFT results (H. A. Staab, F. Diederich, C. Krieger and D. Schweitzer, *Chem. Ber.*, 1983, **116**, 3504).

$\Delta$ (DFT): Difference between our DFT and DFT from the literature (H. Jiao, P.V.R. Schleyer, *Angew. Chem. Int. Ed. in English*, 1996, **35**, 2383).

Table S3. Calculated and experimental chemical shifts  $^1\text{H}$  and  $^{13}\text{C}$  (ppm) for **I**, **II**, **Ia,b-M** and **IIa,b-M** (M=Cr,Mo). Atoms numbering as in Fig.3. Data for W were not calculated.

| Atom                                             | Ligand (exp.)                                    |                                 | Cr              |              | Mo                 |              |                            |                |
|--------------------------------------------------|--------------------------------------------------|---------------------------------|-----------------|--------------|--------------------|--------------|----------------------------|----------------|
|                                                  | I <sup>a</sup>                                   | II <sup>b</sup>                 | I               | II           | I                  | II           |                            |                |
| <b>a</b>                                         | C1                                               | 128.8                           | 135.2           | 95.1         | 111.2              | 96.6         | 113.6                      |                |
|                                                  | C2                                               | 128.8                           | 138.4           | 95.2         | 110.5              | 96.8         | 114.7                      |                |
|                                                  | C3                                               | 132.2                           | 133.0           | 109.1        | 95.1               | 112.2        | 95.6                       |                |
|                                                  | C4                                               | 135.9                           | 138.4           | 106.0        | 107.8              | 109.2        | 110.7                      |                |
|                                                  | C5                                               | 135.9                           | 135.2           | 106.0        | 108.3              | 109.1        | 109.6                      |                |
|                                                  | C6                                               | -                               | 119.7           | -            | 81.8               | -            | 84.6                       |                |
|                                                  | C <sub>CO</sub>                                  | -                               | -               | 219.4; 227.7 | 228.2/ 228.5/229.4 | 220.3; 226.8 | 230.4/230.7                |                |
|                                                  | C <sub>npoc</sub>                                | -                               | 10.48           | 131.6-137.5  | 8.87               | 130.1-136.3  | 10.1/10.7/10.9             |                |
|                                                  | H <sub>coord(I)/</sub><br>H <sub>inner(II)</sub> | -                               | 8.67;<br>9.05   | 6.41         | 6.68/7.64/<br>8.04 | 6.54         | 6.76/7.44/<br>7.89/8.1-8.7 |                |
|                                                  | H <sub>other(I)/</sub><br>H <sub>outer(II)</sub> | 9.32                            | 135.2           | 8.50-8.86    | 111.2              | 8.31-8.67    | 113.6                      |                |
| <b>b</b>                                         | C1                                               | 135.9                           | 134.26          | 103.5        | 95.7               | 107.6        | 96.2                       |                |
|                                                  | C2                                               | 135.9                           | 134.26          | 95.7         | 95.5               | 100.8        | 96.2                       |                |
|                                                  | C3                                               | 132.2                           | 138.4           | 142.8        | 113.4              | 138.8        | 116.5                      |                |
|                                                  | C4                                               | 128.8                           | 135.2           | 131.8        | 110.3              | 131.5        | 113.3                      |                |
|                                                  | C5                                               | 128.8                           | 135.2           | 134.5        | 135.6              | 134.3        | 113.3                      |                |
|                                                  | C6                                               | -                               | 138.4           | -            | 110.4              | -            | 116.5                      |                |
|                                                  | C <sub>CO</sub>                                  | -                               | -               | 225.5        | 223.4/ 227.6       | 228.1        | 224.1/228.7                |                |
|                                                  | H(I)/<br>H <sub>inner(II)</sub>                  | 9.32                            | 10.48           | 9.96; 9.77   | 10.83              | 9.30; 9.49   | 10.3/10.7/10.8             |                |
|                                                  | H <sub>outer(II)</sub>                           |                                 | 8.67;<br>9.05   |              | 6.64/ 6.65         |              | 6.5/8.1-8.7                |                |
|                                                  | <b>a</b>                                         | Atom                            | Ligand (exp.)   |              | Cr                 |              | Mo                         |                |
| I <sup>a</sup>                                   |                                                  |                                 | II <sup>b</sup> | I            | II                 | I            | II                         |                |
| C1                                               |                                                  | 128.8                           | 135.2           | 95.1         | 111.2              | 96.6         | 113.6                      |                |
| C2                                               |                                                  | 128.8                           | 138.4           | 95.2         | 110.5              | 96.8         | 114.7                      |                |
| C3                                               |                                                  | 132.2                           | 133.0           | 109.1        | 95.1               | 112.2        | 95.6                       |                |
| C4                                               |                                                  | 135.9                           | 138.4           | 106.0        | 107.8              | 109.2        | 110.7                      |                |
| C5                                               |                                                  | 135.9                           | 135.2           | 106.0        | 108.3              | 109.1        | 109.6                      |                |
| C6                                               |                                                  | -                               | 119.7           | -            | 81.8               | -            | 84.6                       |                |
| C <sub>CO</sub>                                  |                                                  | -                               | -               | 219.4; 227.7 | 228.2/ 228.5/229.4 | 220.3; 226.8 | 230.4/230.7                |                |
| C <sub>npoc</sub>                                |                                                  | -                               | 10.48           | 131.6-137.5  | 8.87               | 130.1-136.3  | 10.1/10.7/10.9             |                |
| H <sub>coord(I)/</sub><br>H <sub>inner(II)</sub> |                                                  | -                               | 8.67;<br>9.05   | 6.41         | 6.68/7.64/<br>8.04 | 6.54         | 6.76/7.44/<br>7.89/8.1-8.7 |                |
| H <sub>other(I)/</sub><br>H <sub>outer(II)</sub> |                                                  | 9.32                            | 135.2           | 8.50-8.86    | 111.2              | 8.31-8.67    | 113.6                      |                |
| <b>b</b>                                         |                                                  | C1                              | 135.9           | 134.26       | 103.5              | 95.7         | 107.6                      | 96.2           |
|                                                  |                                                  | C2                              | 135.9           | 134.26       | 95.7               | 95.5         | 100.8                      | 96.2           |
|                                                  |                                                  | C3                              | 132.2           | 138.4        | 142.8              | 113.4        | 138.8                      | 116.5          |
|                                                  |                                                  | C4                              | 128.8           | 135.2        | 131.8              | 110.3        | 131.5                      | 113.3          |
|                                                  |                                                  | C5                              | 128.8           | 135.2        | 134.5              | 135.6        | 134.3                      | 113.3          |
|                                                  |                                                  | C6                              | -               | 138.4        | -                  | 110.4        | -                          | 116.5          |
|                                                  |                                                  | C <sub>CO</sub>                 | -               | -            | 225.5              | 223.4/ 227.6 | 228.1                      | 224.1/228.7    |
|                                                  |                                                  | H(I)/<br>H <sub>inner(II)</sub> | 9.32            | 10.48        | 9.96; 9.77         | 10.83        | 9.30; 9.49                 | 10.3/10.7/10.8 |
| H <sub>outer(II)</sub>                           |                                                  | 8.67;<br>9.05                   |                 | 6.64/ 6.65   |                    | 6.5/8.1-8.7  |                            |                |

a) J. M. Robertson and J. G. White, *J. Chem. Soc. (Resumed)*, 1945, 607. b) H. A. Staab, F. Diederich, C. Krieger and D. Schweitzer, *Chem. Ber.*, 1983, **116**, 3504.

Table S4. Symmetrical (*A*) and unsymmetrical (*E*)  $\nu_{\text{CO}}$  vibrational frequencies (in  $\text{cm}^{-1}$ ) complexes **Ia,b-M** **IIa,b-M**. Vibrational frequencies of ( $\eta^6$ -naphthalene) $\text{M}(\text{CO})_3$  **V** ( $\text{M}=\text{Cr}, \text{Mo}, \text{W}$ ) are presented for comparison.

| PBE/L2                                    | <b>Ia-M</b>        | <b>Ib-M</b> | <b>IIa-M</b> | <b>IIb-M</b> | <b>V</b><br>Experiment* | <b>V</b><br>BLYP/JMW** |
|-------------------------------------------|--------------------|-------------|--------------|--------------|-------------------------|------------------------|
| M=Cr<br>$\nu_{\text{CO}}, \text{sm}^{-1}$ | <i>E</i> : 1922.98 | 1915.93     | 1930.37      | 1919.61      | 1893 <sup>a</sup>       | 1917.6                 |
|                                           | <i>E</i> : 1931.55 | 1916.34     | 1936.16      | 1934.49      | 1908                    | 1928.3                 |
|                                           | <i>A</i> : 1977.10 | 1969.46     | 1978.37      | 1978.07      | 1971                    | 1978.2                 |
| M=Mo<br>$\nu_{\text{CO}}, \text{sm}^{-1}$ | <i>E</i> : 1912.74 | 1906.30     | 1919.46      | 1910.37      | 1859 <sup>b</sup>       | -                      |
|                                           | <i>E</i> : 1925.27 | 1906.32     | 1926.99      | 1925.79      | 1883                    | -                      |
|                                           | <i>A</i> : 1975.23 | 1966.35     | 1974.12      | 1974.88      | 1960                    | -                      |
| M=W<br>$\nu_{\text{CO}}, \text{sm}^{-1}$  | <i>E</i> : 1916.02 | 1910.20     | 1922.40      | 1912.80      | 1854 <sup>b</sup>       | -                      |
|                                           | <i>E</i> : 1925.68 | 1910.32     | 1929.83      | 1924.65      | 1879                    | -                      |
|                                           | <i>A</i> : 1974.91 | 1966.76     | 1976.42      | 1973.07      | 1956                    | -                      |

\* a) Yu.F. Oprunenko, N.G. Akhmedov, D.N. Laikov, S.G. Malyugina, V.I. Mstislavsky, V.A. Roznyatovsky and N.A. Ustynyuk, *J. Organomet. Chem.*, 1999, **583**, 136. b) data for **V** (Mo, W) were taken from Oprunenko, *Doctor of Science (Habilitation) Thesis*, Department of Chemistry, M.V. Lomonosov Moscow State University, 1999, Moscow

\*\* B.V. Lokshin, N.E. Borisova, B.M. Senyavin and M.D. Reshetova, *Russ. Chem. Bull.*, 2002, **51**, 1656.

Table S5. NICS (1) data calculated for **I** and **II**. In brackets: NICS (0) extracted from literature

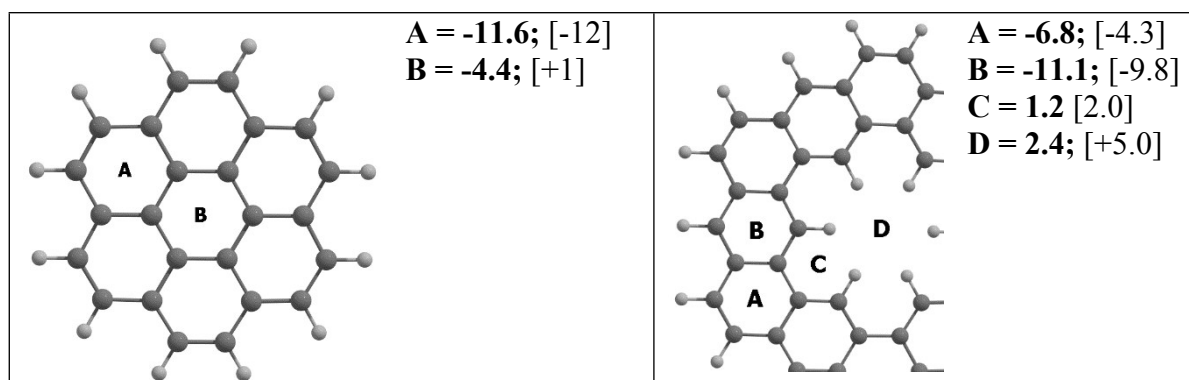

a) H. Jiao, P.V.R. Schleyer, *Angew. Chem. Int. Ed.in English*, 1996, **35**, 2383. b) F. De Proft and P. Geerlings, *Chem. Rev.*, 2001, **101**, 1451. c) J. M. Martin, *Chem. Phys. Lett.*, 1996, **262**, 97.

Table S6. Selected computed data for the optimized structures of **Ia,b-M**. Relative energies in kcal/mol, bond lengths in Å.

|            | <b>Ia-M</b> |       |       | <b>Ib-M</b> |       |       |
|------------|-------------|-------|-------|-------------|-------|-------|
|            | Cr          | Mo    | W     | Cr          | Mo    | W     |
| $\Delta E$ | 0.0         | 0.0   | 0.0   | 12.0        | 11.0  | 12.5  |
| $\Delta G$ | 0.0         | 0.0   | 0.0   | 12.7        | 10.1  | 12.4  |
| M-ligand   | 1.768       | 1.909 | 1.880 | 1.811       | 2,025 | 1.991 |
| C1-C2      | 1.403       | 1.403 | 1.408 | 1.436       | 1,438 | 1.440 |
| C2-C3      | 1.436       | 1.441 | 1.443 | 1.438       | 1,435 | 1.439 |
| C3-C4      | 1.434       | 1.435 | 1.437 | 1.416       | 1.417 | 1.416 |
| C4-C5      | 1.443       | 1.447 | 1.449 | 1.383       | 1.380 | 1.381 |

Table S7. Selected computed data for the optimized structures **IIa,b-M**. Relative energies in kcal/mol; bond lengths in Å, for all **IIa-M**  $\Delta G=0$  kcal/mol; for **IIb-M**  $\Delta G=1.6$  kcal/mol (Mo)  $\Delta G=3.1$  kcal/mol (W).

| Parameter  | <b>IIa-M</b>   |                |                | <b>IIb-M</b>   |                |                |
|------------|----------------|----------------|----------------|----------------|----------------|----------------|
|            | Cr             | Mo             | W              | Cr             | Mo             | W              |
| $\Delta G$ | 0.0            | 0.0            | 0.0            | 5.9            | 1.6            | 3.1            |
| M-C1       | 2.313          | 2.478          | 2.438          | 2.206          | 2.356          | 2.337          |
| M-C2       | 2.304          | 2.468          | 2.421          | 2.206          | 2.356          | 2.337          |
| M-C3       | 2.202          | 2.362          | 2.372          | 2.342          | 2.501          | 2.477          |
| M-C4       | 2.255          | 2.401          | 2.406          | 2.366          | 2.535          | 2.498          |
| A          | $\sim 6^\circ$ | $\sim 6^\circ$ | $\sim 8^\circ$ | $\sim 1^\circ$ | $\sim 2^\circ$ | $\sim 2^\circ$ |
| C1-C2      | 1.432          | 1.433          | 1.440          | 1.402          | 1.402          | 1.408          |
| C2-C3      | 1.437          | 1.440          | 1.436          | 1.443          | 1.448          | 1.449          |
| C3-C4      | 1.423          | 1.424          | 1.433          | 1.442          | 1.443          | 1.445          |
| C4-C5      | 1.445          | 1.450          | 1.444          | 1.466          | 1.470          | 1.471          |

A: deviation of coordinated ring plane with respect to the uncoordinated part of the ligand ( $^\circ$ )

Table S8. Selected bond lengths in **TS(Ia-b)**, **IM(Ia-b)**, **TS' (Ia-b)** for Mo and W complexes, Å.

|            | Mo                                       | W                                        |
|------------|------------------------------------------|------------------------------------------|
| <b>TS</b>  | a=2.404<br>b=2.941<br>c=2.745<br>d=2.694 | a=2.334<br>b=2.894<br>c=2.687<br>d=2.606 |
| <b>IM</b>  | a=2.373<br>b=2.735<br>c=2.842<br>d=2.736 | a=2.298<br>b=2.679<br>c=2.761<br>d=2.677 |
| <b>TS'</b> | a=2.381<br>b=2.719<br>c=2.885<br>d=2.718 | a=2.316<br>b=2.640<br>c=2.848<br>d=2.640 |

Table S9. Selected bond lengths in **TS(Ia-a)** for Cr, Mo, W complexes, Å.

|   | Cr    | Mo    | W     |
|---|-------|-------|-------|
| a | 2.155 | 2.335 | 2.273 |
| b | 2.495 | 2.647 | 2.605 |
| c | 2.495 | 2.647 | 2.605 |
| d | 2.640 | 2.837 | 2.722 |

Table S10. Selected bond lengths in **TS(IIa-b)** for Cr, Mo, W complexes, Å.

|   | Cr    | Mo    | W     |
|---|-------|-------|-------|
| a | 2.159 | 2.353 | 2.301 |
| b | 2.296 | 2.445 | 2.356 |
| c | 2.485 | 2.677 | 2.612 |
| d | 2.745 | 2.962 | 2.930 |

Table. S11. Experimental (related complexes) and calculated IR  $\nu_{\text{CO}}$  values for **IIIa** and **IIIe** complexes ( $\text{cm}^{-1}$ ).

|             | <b>Cr</b>                           |                           | <b>Mo</b>                           |                           | <b>W</b>                            |                           |
|-------------|-------------------------------------|---------------------------|-------------------------------------|---------------------------|-------------------------------------|---------------------------|
|             | DFT                                 | Experiment*               | DFT                                 | Experiment**              | DFT                                 | Experiment**              |
| <b>IIIa</b> | E:1948,91;<br>1948.93<br>A: 1988.50 | E:1893;<br>1908<br>A:1971 | E:1938,02;<br>1938.17<br>A: 1984.62 | E:1859;<br>1883<br>A:1960 | E:1943.63;<br>1943.65<br>A: 1987.43 | E:1856;<br>1879<br>A:1956 |
| <b>IIIe</b> | E:1941.96;<br>1955.15<br>A:1992.35  | E:1893;<br>1908<br>A:1971 | E:1932.24;<br>1948.37<br>A:1990.95  | E:1859;<br>1883<br>A:1960 | E:1936.92;<br>1951.12<br>A:1992.10  | E:1856;<br>1879<br>A:1956 |

\* Oprunenko Yu.F., Doctor of science thesis (Habilitation), Department of Chemistry, M.V. Lomonosov Moscow State University, **1999**, Moscow, 350c; \*\* R.S. Armstrong, M.J. Aroney, C.M. Barnes, K.W. Nugent, *Appl. Organomet. Chem.*, 1990, **4**, 569.

Table S12. Computed bond lengths ( $\text{\AA}$ ) in model graphene **III**.

|       |       |
|-------|-------|
| C1-C2 | 1.422 |
| C2-C3 | 1.424 |
| C3-C4 | 1.427 |
| C4-C5 | 1.423 |
| C5-C6 | 1.439 |
| C6-C7 | 1.394 |
| C6-C8 | 1.440 |
| C8-C9 | 1.364 |
| C8-H  | 1.094 |
